# Supplementary material for: Characterization of gene promoters in pig: conservative elements, regulatory motifs and evolutionary trend
Source: PeerJ. 2019 Jun 25;7:e7204. doi: 10.7717/peerj.7204 (PMC6598670; doi:10.7717/peerj.7204)
Supplement: Supplemental Information 7 — Lists of all paired HK and TS genes. [file peerj-07-7204-s007.xls]

## Sheet: Sheet1
HK Gene_ID	TS Gene_ID
ENSSSCG00000000004	ENSSSCG00000000031
ENSSSCG00000000005	ENSSSCG00000000064
ENSSSCG00000000007	ENSSSCG00000000138
ENSSSCG00000000019	ENSSSCG00000000175
ENSSSCG00000000037	ENSSSCG00000000236
ENSSSCG00000000039	ENSSSCG00000000242
ENSSSCG00000000045	ENSSSCG00000000248
ENSSSCG00000000047	ENSSSCG00000000281
ENSSSCG00000000059	ENSSSCG00000000324
ENSSSCG00000000060	ENSSSCG00000000353
ENSSSCG00000000066	ENSSSCG00000000359
ENSSSCG00000000078	ENSSSCG00000000478
ENSSSCG00000000083	ENSSSCG00000000515
ENSSSCG00000000093	ENSSSCG00000000550
ENSSSCG00000000095	ENSSSCG00000000604
ENSSSCG00000000097	ENSSSCG00000000619
ENSSSCG00000000108	ENSSSCG00000000629
ENSSSCG00000000110	ENSSSCG00000000635
ENSSSCG00000000119	ENSSSCG00000000641
ENSSSCG00000000120	ENSSSCG00000000643
ENSSSCG00000000152	ENSSSCG00000000648
ENSSSCG00000000158	ENSSSCG00000000668
ENSSSCG00000000161	ENSSSCG00000000719
ENSSSCG00000000164	ENSSSCG00000000759
ENSSSCG00000000165	ENSSSCG00000000789
ENSSSCG00000000167	ENSSSCG00000000857
ENSSSCG00000000169	ENSSSCG00000000919
ENSSSCG00000000170	ENSSSCG00000000961
ENSSSCG00000000185	ENSSSCG00000001021
ENSSSCG00000000189	ENSSSCG00000001049
ENSSSCG00000000202	ENSSSCG00000001083
ENSSSCG00000000205	ENSSSCG00000001085
ENSSSCG00000000209	ENSSSCG00000001236
ENSSSCG00000000215	ENSSSCG00000001252
ENSSSCG00000000259	ENSSSCG00000001258
ENSSSCG00000000266	ENSSSCG00000001294
ENSSSCG00000000267	ENSSSCG00000001342
ENSSSCG00000000268	ENSSSCG00000001370
ENSSSCG00000000282	ENSSSCG00000001376
ENSSSCG00000000290	ENSSSCG00000001388
ENSSSCG00000000359	ENSSSCG00000001389
ENSSSCG00000000364	ENSSSCG00000001394
ENSSSCG00000000377	ENSSSCG00000001398
ENSSSCG00000000383	ENSSSCG00000001410
ENSSSCG00000000406	ENSSSCG00000001411
ENSSSCG00000000408	ENSSSCG00000001413
ENSSSCG00000000417	ENSSSCG00000001414
ENSSSCG00000000426	ENSSSCG00000001423
ENSSSCG00000000444	ENSSSCG00000001433
ENSSSCG00000000458	ENSSSCG00000001435
ENSSSCG00000000469	ENSSSCG00000001437
ENSSSCG00000000490	ENSSSCG00000001444
ENSSSCG00000000491	ENSSSCG00000001447
ENSSSCG00000000508	ENSSSCG00000001453
ENSSSCG00000000512	ENSSSCG00000001454
ENSSSCG00000000520	ENSSSCG00000001476
ENSSSCG00000000523	ENSSSCG00000001575
ENSSSCG00000000524	ENSSSCG00000001651
ENSSSCG00000000529	ENSSSCG00000001703
ENSSSCG00000000534	ENSSSCG00000001738
ENSSSCG00000000536	ENSSSCG00000001739
ENSSSCG00000000543	ENSSSCG00000001745
ENSSSCG00000000552	ENSSSCG00000001749
ENSSSCG00000000553	ENSSSCG00000001750
ENSSSCG00000000572	ENSSSCG00000001787
ENSSSCG00000000579	ENSSSCG00000001790
ENSSSCG00000000587	ENSSSCG00000001830
ENSSSCG00000000611	ENSSSCG00000001831
ENSSSCG00000000662	ENSSSCG00000001832
ENSSSCG00000000684	ENSSSCG00000001993
ENSSSCG00000000691	ENSSSCG00000002045
ENSSSCG00000000695	ENSSSCG00000002048
ENSSSCG00000000696	ENSSSCG00000002049
ENSSSCG00000000722	ENSSSCG00000002063
ENSSSCG00000000723	ENSSSCG00000002097
ENSSSCG00000000728	ENSSSCG00000002164
ENSSSCG00000000742	ENSSSCG00000002169
ENSSSCG00000000745	ENSSSCG00000002251
ENSSSCG00000000746	ENSSSCG00000002285
ENSSSCG00000000753	ENSSSCG00000002479
ENSSSCG00000000766	ENSSSCG00000002481
ENSSSCG00000000793	ENSSSCG00000002505
ENSSSCG00000000840	ENSSSCG00000002542
ENSSSCG00000000841	ENSSSCG00000002555
ENSSSCG00000000842	ENSSSCG00000002579
ENSSSCG00000000843	ENSSSCG00000002586
ENSSSCG00000000846	ENSSSCG00000002696
ENSSSCG00000000848	ENSSSCG00000002700
ENSSSCG00000000870	ENSSSCG00000002706
ENSSSCG00000000877	ENSSSCG00000002762
ENSSSCG00000000879	ENSSSCG00000002776
ENSSSCG00000000895	ENSSSCG00000002778
ENSSSCG00000000900	ENSSSCG00000002863
ENSSSCG00000000902	ENSSSCG00000002883
ENSSSCG00000000910	ENSSSCG00000002886
ENSSSCG00000000912	ENSSSCG00000002893
ENSSSCG00000000925	ENSSSCG00000002917
ENSSSCG00000000927	ENSSSCG00000002918
ENSSSCG00000000941	ENSSSCG00000002950
ENSSSCG00000000942	ENSSSCG00000002979
ENSSSCG00000000970	ENSSSCG00000002983
ENSSSCG00000000972	ENSSSCG00000003068
ENSSSCG00000000980	ENSSSCG00000003076
ENSSSCG00000000998	ENSSSCG00000003119
ENSSSCG00000000999	ENSSSCG00000003120
ENSSSCG00000001005	ENSSSCG00000003219
ENSSSCG00000001010	ENSSSCG00000003222
ENSSSCG00000001024	ENSSSCG00000003226
ENSSSCG00000001030	ENSSSCG00000003236
ENSSSCG00000001038	ENSSSCG00000003250
ENSSSCG00000001049	ENSSSCG00000003284
ENSSSCG00000001056	ENSSSCG00000003314
ENSSSCG00000001057	ENSSSCG00000003315
ENSSSCG00000001062	ENSSSCG00000003338
ENSSSCG00000001094	ENSSSCG00000003428
ENSSSCG00000001095	ENSSSCG00000003440
ENSSSCG00000001156	ENSSSCG00000003441
ENSSSCG00000001197	ENSSSCG00000003443
ENSSSCG00000001201	ENSSSCG00000003444
ENSSSCG00000001204	ENSSSCG00000003446
ENSSSCG00000001206	ENSSSCG00000003451
ENSSSCG00000001347	ENSSSCG00000003459
ENSSSCG00000001373	ENSSSCG00000003460
ENSSSCG00000001376	ENSSSCG00000003481
ENSSSCG00000001379	ENSSSCG00000003503
ENSSSCG00000001383	ENSSSCG00000003553
ENSSSCG00000001412	ENSSSCG00000003577
ENSSSCG00000001431	ENSSSCG00000003586
ENSSSCG00000001477	ENSSSCG00000003617
ENSSSCG00000001497	ENSSSCG00000003775
ENSSSCG00000001501	ENSSSCG00000003779
ENSSSCG00000001504	ENSSSCG00000003783
ENSSSCG00000001505	ENSSSCG00000003799
ENSSSCG00000001508	ENSSSCG00000003801
ENSSSCG00000001511	ENSSSCG00000003802
ENSSSCG00000001515	ENSSSCG00000003824
ENSSSCG00000001517	ENSSSCG00000003825
ENSSSCG00000001531	ENSSSCG00000003908
ENSSSCG00000001532	ENSSSCG00000003970
ENSSSCG00000001533	ENSSSCG00000004169
ENSSSCG00000001536	ENSSSCG00000004189
ENSSSCG00000001537	ENSSSCG00000004190
ENSSSCG00000001539	ENSSSCG00000004244
ENSSSCG00000001564	ENSSSCG00000004270
ENSSSCG00000001578	ENSSSCG00000004284
ENSSSCG00000001611	ENSSSCG00000004334
ENSSSCG00000001626	ENSSSCG00000004357
ENSSSCG00000001638	ENSSSCG00000004361
ENSSSCG00000001646	ENSSSCG00000004366
ENSSSCG00000001656	ENSSSCG00000004421
ENSSSCG00000001658	ENSSSCG00000004468
ENSSSCG00000001675	ENSSSCG00000004477
ENSSSCG00000001679	ENSSSCG00000004486
ENSSSCG00000001686	ENSSSCG00000004520
ENSSSCG00000001692	ENSSSCG00000004600
ENSSSCG00000001696	ENSSSCG00000004747
ENSSSCG00000001697	ENSSSCG00000004898
ENSSSCG00000001701	ENSSSCG00000004910
ENSSSCG00000001706	ENSSSCG00000004934
ENSSSCG00000001708	ENSSSCG00000004961
ENSSSCG00000001731	ENSSSCG00000004979
ENSSSCG00000001756	ENSSSCG00000005077
ENSSSCG00000001769	ENSSSCG00000005078
ENSSSCG00000001773	ENSSSCG00000005118
ENSSSCG00000001774	ENSSSCG00000005119
ENSSSCG00000001820	ENSSSCG00000005121
ENSSSCG00000001821	ENSSSCG00000005194
ENSSSCG00000001824	ENSSSCG00000005207
ENSSSCG00000001859	ENSSSCG00000005211
ENSSSCG00000001861	ENSSSCG00000005225
ENSSSCG00000001865	ENSSSCG00000005229
ENSSSCG00000001866	ENSSSCG00000005310
ENSSSCG00000001868	ENSSSCG00000005370
ENSSSCG00000001871	ENSSSCG00000005459
ENSSSCG00000001876	ENSSSCG00000005462
ENSSSCG00000001877	ENSSSCG00000005464
ENSSSCG00000001880	ENSSSCG00000005484
ENSSSCG00000001884	ENSSSCG00000005501
ENSSSCG00000001898	ENSSSCG00000005549
ENSSSCG00000001903	ENSSSCG00000005551
ENSSSCG00000001904	ENSSSCG00000005593
ENSSSCG00000001941	ENSSSCG00000005656
ENSSSCG00000001947	ENSSSCG00000005657
ENSSSCG00000001955	ENSSSCG00000005756
ENSSSCG00000001960	ENSSSCG00000005757
ENSSSCG00000001966	ENSSSCG00000005768
ENSSSCG00000001968	ENSSSCG00000005791
ENSSSCG00000001970	ENSSSCG00000005793
ENSSSCG00000001972	ENSSSCG00000005872
ENSSSCG00000001973	ENSSSCG00000005874
ENSSSCG00000001992	ENSSSCG00000005899
ENSSSCG00000001997	ENSSSCG00000005906
ENSSSCG00000002016	ENSSSCG00000005934
ENSSSCG00000002020	ENSSSCG00000005967
ENSSSCG00000002021	ENSSSCG00000005969
ENSSSCG00000002036	ENSSSCG00000005977
ENSSSCG00000002040	ENSSSCG00000006003
ENSSSCG00000002051	ENSSSCG00000006059
ENSSSCG00000002081	ENSSSCG00000006061
ENSSSCG00000002127	ENSSSCG00000006105
ENSSSCG00000002137	ENSSSCG00000006160
ENSSSCG00000002138	ENSSSCG00000006161
ENSSSCG00000002143	ENSSSCG00000006203
ENSSSCG00000002145	ENSSSCG00000006213
ENSSSCG00000002245	ENSSSCG00000006215
ENSSSCG00000002247	ENSSSCG00000006328
ENSSSCG00000002285	ENSSSCG00000006381
ENSSSCG00000002290	ENSSSCG00000006398
ENSSSCG00000002295	ENSSSCG00000006422
ENSSSCG00000002307	ENSSSCG00000006423
ENSSSCG00000002328	ENSSSCG00000006425
ENSSSCG00000002330	ENSSSCG00000006427
ENSSSCG00000002337	ENSSSCG00000006428
ENSSSCG00000002353	ENSSSCG00000006450
ENSSSCG00000002367	ENSSSCG00000006525
ENSSSCG00000002372	ENSSSCG00000006529
ENSSSCG00000002377	ENSSSCG00000006578
ENSSSCG00000002378	ENSSSCG00000006581
ENSSSCG00000002381	ENSSSCG00000006582
ENSSSCG00000002390	ENSSSCG00000006589
ENSSSCG00000002392	ENSSSCG00000006592
ENSSSCG00000002406	ENSSSCG00000006594
ENSSSCG00000002408	ENSSSCG00000006610
ENSSSCG00000002410	ENSSSCG00000006618
ENSSSCG00000002411	ENSSSCG00000006703
ENSSSCG00000002427	ENSSSCG00000006713
ENSSSCG00000002431	ENSSSCG00000006725
ENSSSCG00000002433	ENSSSCG00000006852
ENSSSCG00000002434	ENSSSCG00000006911
ENSSSCG00000002445	ENSSSCG00000006924
ENSSSCG00000002448	ENSSSCG00000006939
ENSSSCG00000002455	ENSSSCG00000006978
ENSSSCG00000002458	ENSSSCG00000007100
ENSSSCG00000002459	ENSSSCG00000007112
ENSSSCG00000002460	ENSSSCG00000007122
ENSSSCG00000002469	ENSSSCG00000007153
ENSSSCG00000002499	ENSSSCG00000007183
ENSSSCG00000002502	ENSSSCG00000007185
ENSSSCG00000002509	ENSSSCG00000007187
ENSSSCG00000002517	ENSSSCG00000007198
ENSSSCG00000002528	ENSSSCG00000007219
ENSSSCG00000002530	ENSSSCG00000007260
ENSSSCG00000002532	ENSSSCG00000007261
ENSSSCG00000002535	ENSSSCG00000007263
ENSSSCG00000002546	ENSSSCG00000007368
ENSSSCG00000002629	ENSSSCG00000007430
ENSSSCG00000002633	ENSSSCG00000007440
ENSSSCG00000002640	ENSSSCG00000007448
ENSSSCG00000002645	ENSSSCG00000007451
ENSSSCG00000002652	ENSSSCG00000007473
ENSSSCG00000002655	ENSSSCG00000007474
ENSSSCG00000002663	ENSSSCG00000007481
ENSSSCG00000002667	ENSSSCG00000007482
ENSSSCG00000002670	ENSSSCG00000007492
ENSSSCG00000002672	ENSSSCG00000007493
ENSSSCG00000002680	ENSSSCG00000007495
ENSSSCG00000002703	ENSSSCG00000007496
ENSSSCG00000002706	ENSSSCG00000007503
ENSSSCG00000002707	ENSSSCG00000007507
ENSSSCG00000002714	ENSSSCG00000007520
ENSSSCG00000002719	ENSSSCG00000007538
ENSSSCG00000002723	ENSSSCG00000007540
ENSSSCG00000002724	ENSSSCG00000007646
ENSSSCG00000002725	ENSSSCG00000007718
ENSSSCG00000002729	ENSSSCG00000007774
ENSSSCG00000002738	ENSSSCG00000007776
ENSSSCG00000002740	ENSSSCG00000007830
ENSSSCG00000002746	ENSSSCG00000007864
ENSSSCG00000002748	ENSSSCG00000007922
ENSSSCG00000002753	ENSSSCG00000007954
ENSSSCG00000002758	ENSSSCG00000007962
ENSSSCG00000002759	ENSSSCG00000007978
ENSSSCG00000002760	ENSSSCG00000008003
ENSSSCG00000002762	ENSSSCG00000008054
ENSSSCG00000002790	ENSSSCG00000008066
ENSSSCG00000002793	ENSSSCG00000008111
ENSSSCG00000002806	ENSSSCG00000008127
ENSSSCG00000002820	ENSSSCG00000008185
ENSSSCG00000002822	ENSSSCG00000008193
ENSSSCG00000002843	ENSSSCG00000008194
ENSSSCG00000002846	ENSSSCG00000008205
ENSSSCG00000002853	ENSSSCG00000008208
ENSSSCG00000002854	ENSSSCG00000008250
ENSSSCG00000002860	ENSSSCG00000008281
ENSSSCG00000002865	ENSSSCG00000008385
ENSSSCG00000002867	ENSSSCG00000008456
ENSSSCG00000002876	ENSSSCG00000008533
ENSSSCG00000002877	ENSSSCG00000008545
ENSSSCG00000002885	ENSSSCG00000008601
ENSSSCG00000002896	ENSSSCG00000008623
ENSSSCG00000002905	ENSSSCG00000008662
ENSSSCG00000002906	ENSSSCG00000008720
ENSSSCG00000002923	ENSSSCG00000008721
ENSSSCG00000002926	ENSSSCG00000008742
ENSSSCG00000002930	ENSSSCG00000008769
ENSSSCG00000002931	ENSSSCG00000008820
ENSSSCG00000002936	ENSSSCG00000008824
ENSSSCG00000002937	ENSSSCG00000008833
ENSSSCG00000002952	ENSSSCG00000008866
ENSSSCG00000002956	ENSSSCG00000008909
ENSSSCG00000002959	ENSSSCG00000008933
ENSSSCG00000002972	ENSSSCG00000008994
ENSSSCG00000002995	ENSSSCG00000008995
ENSSSCG00000002998	ENSSSCG00000009079
ENSSSCG00000002999	ENSSSCG00000009087
ENSSSCG00000003000	ENSSSCG00000009088
ENSSSCG00000003016	ENSSSCG00000009090
ENSSSCG00000003030	ENSSSCG00000009197
ENSSSCG00000003046	ENSSSCG00000009259
ENSSSCG00000003055	ENSSSCG00000009268
ENSSSCG00000003058	ENSSSCG00000009313
ENSSSCG00000003070	ENSSSCG00000009316
ENSSSCG00000003076	ENSSSCG00000009319
ENSSSCG00000003077	ENSSSCG00000009422
ENSSSCG00000003085	ENSSSCG00000009471
ENSSSCG00000003089	ENSSSCG00000009563
ENSSSCG00000003091	ENSSSCG00000009609
ENSSSCG00000003093	ENSSSCG00000009610
ENSSSCG00000003098	ENSSSCG00000009652
ENSSSCG00000003100	ENSSSCG00000009698
ENSSSCG00000003103	ENSSSCG00000009738
ENSSSCG00000003107	ENSSSCG00000009768
ENSSSCG00000003110	ENSSSCG00000009798
ENSSSCG00000003111	ENSSSCG00000009812
ENSSSCG00000003114	ENSSSCG00000009817
ENSSSCG00000003120	ENSSSCG00000009839
ENSSSCG00000003121	ENSSSCG00000009876
ENSSSCG00000003134	ENSSSCG00000009996
ENSSSCG00000003141	ENSSSCG00000010056
ENSSSCG00000003146	ENSSSCG00000010114
ENSSSCG00000003150	ENSSSCG00000010128
ENSSSCG00000003152	ENSSSCG00000010146
ENSSSCG00000003169	ENSSSCG00000010148
ENSSSCG00000003182	ENSSSCG00000010298
ENSSSCG00000003192	ENSSSCG00000010330
ENSSSCG00000003197	ENSSSCG00000010331
ENSSSCG00000003211	ENSSSCG00000010350
ENSSSCG00000003217	ENSSSCG00000010359
ENSSSCG00000003233	ENSSSCG00000010385
ENSSSCG00000003235	ENSSSCG00000010400
ENSSSCG00000003262	ENSSSCG00000010411
ENSSSCG00000003263	ENSSSCG00000010475
ENSSSCG00000003264	ENSSSCG00000010497
ENSSSCG00000003265	ENSSSCG00000010580
ENSSSCG00000003288	ENSSSCG00000010608
ENSSSCG00000003317	ENSSSCG00000010626
ENSSSCG00000003324	ENSSSCG00000010702
ENSSSCG00000003332	ENSSSCG00000010707
ENSSSCG00000003339	ENSSSCG00000010711
ENSSSCG00000003343	ENSSSCG00000010716
ENSSSCG00000003347	ENSSSCG00000010734
ENSSSCG00000003348	ENSSSCG00000010742
ENSSSCG00000003354	ENSSSCG00000010752
ENSSSCG00000003359	ENSSSCG00000010816
ENSSSCG00000003360	ENSSSCG00000010839
ENSSSCG00000003363	ENSSSCG00000010869
ENSSSCG00000003369	ENSSSCG00000010908
ENSSSCG00000003378	ENSSSCG00000010968
ENSSSCG00000003382	ENSSSCG00000010972
ENSSSCG00000003383	ENSSSCG00000011013
ENSSSCG00000003384	ENSSSCG00000011106
ENSSSCG00000003393	ENSSSCG00000011141
ENSSSCG00000003404	ENSSSCG00000011256
ENSSSCG00000003405	ENSSSCG00000011270
ENSSSCG00000003412	ENSSSCG00000011300
ENSSSCG00000003413	ENSSSCG00000011317
ENSSSCG00000003420	ENSSSCG00000011363
ENSSSCG00000003428	ENSSSCG00000011386
ENSSSCG00000003432	ENSSSCG00000011463
ENSSSCG00000003461	ENSSSCG00000011491
ENSSSCG00000003462	ENSSSCG00000011559
ENSSSCG00000003478	ENSSSCG00000011569
ENSSSCG00000003490	ENSSSCG00000011592
ENSSSCG00000003493	ENSSSCG00000011657
ENSSSCG00000003522	ENSSSCG00000011692
ENSSSCG00000003531	ENSSSCG00000011695
ENSSSCG00000003553	ENSSSCG00000011701
ENSSSCG00000003554	ENSSSCG00000011723
ENSSSCG00000003556	ENSSSCG00000011725
ENSSSCG00000003566	ENSSSCG00000011735
ENSSSCG00000003570	ENSSSCG00000011743
ENSSSCG00000003580	ENSSSCG00000011752
ENSSSCG00000003583	ENSSSCG00000011795
ENSSSCG00000003588	ENSSSCG00000011817
ENSSSCG00000003591	ENSSSCG00000011887
ENSSSCG00000003596	ENSSSCG00000011906
ENSSSCG00000003611	ENSSSCG00000011933
ENSSSCG00000003612	ENSSSCG00000011946
ENSSSCG00000003621	ENSSSCG00000011968
ENSSSCG00000003626	ENSSSCG00000012018
ENSSSCG00000003627	ENSSSCG00000012046
ENSSSCG00000003630	ENSSSCG00000012102
ENSSSCG00000003634	ENSSSCG00000012110
ENSSSCG00000003643	ENSSSCG00000012123
ENSSSCG00000003645	ENSSSCG00000012125
ENSSSCG00000003652	ENSSSCG00000012126
ENSSSCG00000003653	ENSSSCG00000012130
ENSSSCG00000003664	ENSSSCG00000012131
ENSSSCG00000003667	ENSSSCG00000012134
ENSSSCG00000003699	ENSSSCG00000012147
ENSSSCG00000003701	ENSSSCG00000012148
ENSSSCG00000003713	ENSSSCG00000012151
ENSSSCG00000003727	ENSSSCG00000012155
ENSSSCG00000003730	ENSSSCG00000012161
ENSSSCG00000003731	ENSSSCG00000012165
ENSSSCG00000003742	ENSSSCG00000012167
ENSSSCG00000003747	ENSSSCG00000012172
ENSSSCG00000003749	ENSSSCG00000012198
ENSSSCG00000003757	ENSSSCG00000012199
ENSSSCG00000003772	ENSSSCG00000012219
ENSSSCG00000003779	ENSSSCG00000012220
ENSSSCG00000003791	ENSSSCG00000012233
ENSSSCG00000003792	ENSSSCG00000012237
ENSSSCG00000003815	ENSSSCG00000012241
ENSSSCG00000003830	ENSSSCG00000012257
ENSSSCG00000003842	ENSSSCG00000012262
ENSSSCG00000003843	ENSSSCG00000012269
ENSSSCG00000003844	ENSSSCG00000012280
ENSSSCG00000003849	ENSSSCG00000012282
ENSSSCG00000003850	ENSSSCG00000012287
ENSSSCG00000003858	ENSSSCG00000012288
ENSSSCG00000003862	ENSSSCG00000012306
ENSSSCG00000003863	ENSSSCG00000012307
ENSSSCG00000003867	ENSSSCG00000012317
ENSSSCG00000003868	ENSSSCG00000012319
ENSSSCG00000003885	ENSSSCG00000012327
ENSSSCG00000003902	ENSSSCG00000012334
ENSSSCG00000003904	ENSSSCG00000012345
ENSSSCG00000003918	ENSSSCG00000012347
ENSSSCG00000003922	ENSSSCG00000012362
ENSSSCG00000003935	ENSSSCG00000012378
ENSSSCG00000003941	ENSSSCG00000012381
ENSSSCG00000003942	ENSSSCG00000012384
ENSSSCG00000003973	ENSSSCG00000012386
ENSSSCG00000003976	ENSSSCG00000012394
ENSSSCG00000003982	ENSSSCG00000012403
ENSSSCG00000003984	ENSSSCG00000012434
ENSSSCG00000003985	ENSSSCG00000012440
ENSSSCG00000003987	ENSSSCG00000012448
ENSSSCG00000003988	ENSSSCG00000012456
ENSSSCG00000003998	ENSSSCG00000012459
ENSSSCG00000004004	ENSSSCG00000012463
ENSSSCG00000004010	ENSSSCG00000012485
ENSSSCG00000004012	ENSSSCG00000012491
ENSSSCG00000004032	ENSSSCG00000012492
ENSSSCG00000004042	ENSSSCG00000012494
ENSSSCG00000004043	ENSSSCG00000012495
ENSSSCG00000004047	ENSSSCG00000012508
ENSSSCG00000004063	ENSSSCG00000012509
ENSSSCG00000004064	ENSSSCG00000012512
ENSSSCG00000004071	ENSSSCG00000012520
ENSSSCG00000004088	ENSSSCG00000012531
ENSSSCG00000004134	ENSSSCG00000012534
ENSSSCG00000004135	ENSSSCG00000012569
ENSSSCG00000004140	ENSSSCG00000012590
ENSSSCG00000004144	ENSSSCG00000012601
ENSSSCG00000004165	ENSSSCG00000012602
ENSSSCG00000004196	ENSSSCG00000012613
ENSSSCG00000004203	ENSSSCG00000012619
ENSSSCG00000004220	ENSSSCG00000012631
ENSSSCG00000004221	ENSSSCG00000012638
ENSSSCG00000004224	ENSSSCG00000012639
ENSSSCG00000004238	ENSSSCG00000012649
ENSSSCG00000004247	ENSSSCG00000012653
ENSSSCG00000004253	ENSSSCG00000012657
ENSSSCG00000004263	ENSSSCG00000012660
ENSSSCG00000004272	ENSSSCG00000012665
ENSSSCG00000004276	ENSSSCG00000012669
ENSSSCG00000004293	ENSSSCG00000012671
ENSSSCG00000004307	ENSSSCG00000012695
ENSSSCG00000004311	ENSSSCG00000012703
ENSSSCG00000004324	ENSSSCG00000012718
ENSSSCG00000004327	ENSSSCG00000012723
ENSSSCG00000004329	ENSSSCG00000012724
ENSSSCG00000004339	ENSSSCG00000012727
ENSSSCG00000004342	ENSSSCG00000012734
ENSSSCG00000004350	ENSSSCG00000012735
ENSSSCG00000004353	ENSSSCG00000012743
ENSSSCG00000004358	ENSSSCG00000012753
ENSSSCG00000004360	ENSSSCG00000012758
ENSSSCG00000004368	ENSSSCG00000012770
ENSSSCG00000004385	ENSSSCG00000012773
ENSSSCG00000004390	ENSSSCG00000012784
ENSSSCG00000004392	ENSSSCG00000012791
ENSSSCG00000004394	ENSSSCG00000012794
ENSSSCG00000004395	ENSSSCG00000012795
ENSSSCG00000004403	ENSSSCG00000012812
ENSSSCG00000004423	ENSSSCG00000012827
ENSSSCG00000004456	ENSSSCG00000012835
ENSSSCG00000004498	ENSSSCG00000012840
ENSSSCG00000004500	ENSSSCG00000012852
ENSSSCG00000004508	ENSSSCG00000012974
ENSSSCG00000004517	ENSSSCG00000012999
ENSSSCG00000004524	ENSSSCG00000013007
ENSSSCG00000004538	ENSSSCG00000013013
ENSSSCG00000004543	ENSSSCG00000013050
ENSSSCG00000004546	ENSSSCG00000013057
ENSSSCG00000004556	ENSSSCG00000013118
ENSSSCG00000004561	ENSSSCG00000013131
ENSSSCG00000004563	ENSSSCG00000013139
ENSSSCG00000004583	ENSSSCG00000013148
ENSSSCG00000004589	ENSSSCG00000013174
ENSSSCG00000004590	ENSSSCG00000013237
ENSSSCG00000004592	ENSSSCG00000013242
ENSSSCG00000004603	ENSSSCG00000013287
ENSSSCG00000004610	ENSSSCG00000013297
ENSSSCG00000004624	ENSSSCG00000013327
ENSSSCG00000004625	ENSSSCG00000013351
ENSSSCG00000004647	ENSSSCG00000013413
ENSSSCG00000004648	ENSSSCG00000013572
ENSSSCG00000004652	ENSSSCG00000013578
ENSSSCG00000004684	ENSSSCG00000013606
ENSSSCG00000004691	ENSSSCG00000013612
ENSSSCG00000004693	ENSSSCG00000013639
ENSSSCG00000004697	ENSSSCG00000013655
ENSSSCG00000004701	ENSSSCG00000013696
ENSSSCG00000004709	ENSSSCG00000013766
ENSSSCG00000004710	ENSSSCG00000013775
ENSSSCG00000004716	ENSSSCG00000013813
ENSSSCG00000004717	ENSSSCG00000013829
ENSSSCG00000004724	ENSSSCG00000013836
ENSSSCG00000004730	ENSSSCG00000013841
ENSSSCG00000004737	ENSSSCG00000013842
ENSSSCG00000004741	ENSSSCG00000013853
ENSSSCG00000004745	ENSSSCG00000013888
ENSSSCG00000004752	ENSSSCG00000013978
ENSSSCG00000004753	ENSSSCG00000014010
ENSSSCG00000004757	ENSSSCG00000014028
ENSSSCG00000004762	ENSSSCG00000014047
ENSSSCG00000004764	ENSSSCG00000014048
ENSSSCG00000004772	ENSSSCG00000014070
ENSSSCG00000004785	ENSSSCG00000014131
ENSSSCG00000004792	ENSSSCG00000014143
ENSSSCG00000004799	ENSSSCG00000014177
ENSSSCG00000004821	ENSSSCG00000014184
ENSSSCG00000004832	ENSSSCG00000014223
ENSSSCG00000004845	ENSSSCG00000014232
ENSSSCG00000004847	ENSSSCG00000014320
ENSSSCG00000004852	ENSSSCG00000014351
ENSSSCG00000004861	ENSSSCG00000014414
ENSSSCG00000004884	ENSSSCG00000014416
ENSSSCG00000004895	ENSSSCG00000014421
ENSSSCG00000004899	ENSSSCG00000014424
ENSSSCG00000004901	ENSSSCG00000014427
ENSSSCG00000004926	ENSSSCG00000014460
ENSSSCG00000004936	ENSSSCG00000014538
ENSSSCG00000004946	ENSSSCG00000014564
ENSSSCG00000004955	ENSSSCG00000014608
ENSSSCG00000004984	ENSSSCG00000014614
ENSSSCG00000004989	ENSSSCG00000014618
ENSSSCG00000004997	ENSSSCG00000014632
ENSSSCG00000005004	ENSSSCG00000014639
ENSSSCG00000005005	ENSSSCG00000014643
ENSSSCG00000005007	ENSSSCG00000014648
ENSSSCG00000005015	ENSSSCG00000014661
ENSSSCG00000005016	ENSSSCG00000014672
ENSSSCG00000005038	ENSSSCG00000014681
ENSSSCG00000005058	ENSSSCG00000014708
ENSSSCG00000005062	ENSSSCG00000014710
ENSSSCG00000005064	ENSSSCG00000014722
ENSSSCG00000005065	ENSSSCG00000014725
ENSSSCG00000005072	ENSSSCG00000014726
ENSSSCG00000005073	ENSSSCG00000014729
ENSSSCG00000005097	ENSSSCG00000014764
ENSSSCG00000005102	ENSSSCG00000014787
ENSSSCG00000005104	ENSSSCG00000014875
ENSSSCG00000005105	ENSSSCG00000014927
ENSSSCG00000005113	ENSSSCG00000014933
ENSSSCG00000005127	ENSSSCG00000014955
ENSSSCG00000005171	ENSSSCG00000014984
ENSSSCG00000005174	ENSSSCG00000014996
ENSSSCG00000005196	ENSSSCG00000015037
ENSSSCG00000005219	ENSSSCG00000015063
ENSSSCG00000005220	ENSSSCG00000015085
ENSSSCG00000005227	ENSSSCG00000015150
ENSSSCG00000005234	ENSSSCG00000015173
ENSSSCG00000005235	ENSSSCG00000015195
ENSSSCG00000005245	ENSSSCG00000015227
ENSSSCG00000005252	ENSSSCG00000015279
ENSSSCG00000005255	ENSSSCG00000015281
ENSSSCG00000005271	ENSSSCG00000015362
ENSSSCG00000005274	ENSSSCG00000015364
ENSSSCG00000005276	ENSSSCG00000015367
ENSSSCG00000005282	ENSSSCG00000015368
ENSSSCG00000005302	ENSSSCG00000015378
ENSSSCG00000005310	ENSSSCG00000015405
ENSSSCG00000005315	ENSSSCG00000015430
ENSSSCG00000005320	ENSSSCG00000015472
ENSSSCG00000005322	ENSSSCG00000015537
ENSSSCG00000005354	ENSSSCG00000015563
ENSSSCG00000005355	ENSSSCG00000015592
ENSSSCG00000005364	ENSSSCG00000015595
ENSSSCG00000005366	ENSSSCG00000015597
ENSSSCG00000005370	ENSSSCG00000015629
ENSSSCG00000005373	ENSSSCG00000015644
ENSSSCG00000005383	ENSSSCG00000015688
ENSSSCG00000005386	ENSSSCG00000015732
ENSSSCG00000005387	ENSSSCG00000015775
ENSSSCG00000005388	ENSSSCG00000015782
ENSSSCG00000005399	ENSSSCG00000015807
ENSSSCG00000005427	ENSSSCG00000015808
ENSSSCG00000005440	ENSSSCG00000015815
ENSSSCG00000005441	ENSSSCG00000015926
ENSSSCG00000005460	ENSSSCG00000015951
ENSSSCG00000005507	ENSSSCG00000015979
ENSSSCG00000005508	ENSSSCG00000015980
ENSSSCG00000005532	ENSSSCG00000015996
ENSSSCG00000005575	ENSSSCG00000016067
ENSSSCG00000005576	ENSSSCG00000016122
ENSSSCG00000005577	ENSSSCG00000016138
ENSSSCG00000005582	ENSSSCG00000016153
ENSSSCG00000005585	ENSSSCG00000016164
ENSSSCG00000005590	ENSSSCG00000016173
ENSSSCG00000005596	ENSSSCG00000016230
ENSSSCG00000005597	ENSSSCG00000016233
ENSSSCG00000005615	ENSSSCG00000016254
ENSSSCG00000005621	ENSSSCG00000016255
ENSSSCG00000005626	ENSSSCG00000016270
ENSSSCG00000005644	ENSSSCG00000016284
ENSSSCG00000005645	ENSSSCG00000016288
ENSSSCG00000005646	ENSSSCG00000016289
ENSSSCG00000005649	ENSSSCG00000016345
ENSSSCG00000005650	ENSSSCG00000016391
ENSSSCG00000005652	ENSSSCG00000016458
ENSSSCG00000005659	ENSSSCG00000016459
ENSSSCG00000005662	ENSSSCG00000016472
ENSSSCG00000005666	ENSSSCG00000016504
ENSSSCG00000005667	ENSSSCG00000016561
ENSSSCG00000005679	ENSSSCG00000016581
ENSSSCG00000005683	ENSSSCG00000016589
ENSSSCG00000005704	ENSSSCG00000016613
ENSSSCG00000005706	ENSSSCG00000016732
ENSSSCG00000005711	ENSSSCG00000016850
ENSSSCG00000005720	ENSSSCG00000016885
ENSSSCG00000005725	ENSSSCG00000016907
ENSSSCG00000005729	ENSSSCG00000016979
ENSSSCG00000005731	ENSSSCG00000016996
ENSSSCG00000005733	ENSSSCG00000017008
ENSSSCG00000005739	ENSSSCG00000017022
ENSSSCG00000005749	ENSSSCG00000017038
ENSSSCG00000005763	ENSSSCG00000017077
ENSSSCG00000005773	ENSSSCG00000017167
ENSSSCG00000005774	ENSSSCG00000017186
ENSSSCG00000005779	ENSSSCG00000017204
ENSSSCG00000005786	ENSSSCG00000017234
ENSSSCG00000005787	ENSSSCG00000017236
ENSSSCG00000005826	ENSSSCG00000017277
ENSSSCG00000005833	ENSSSCG00000017414
ENSSSCG00000005837	ENSSSCG00000017437
ENSSSCG00000005841	ENSSSCG00000017455
ENSSSCG00000005842	ENSSSCG00000017461
ENSSSCG00000005846	ENSSSCG00000017475
ENSSSCG00000005855	ENSSSCG00000017496
ENSSSCG00000005859	ENSSSCG00000017498
ENSSSCG00000005860	ENSSSCG00000017543
ENSSSCG00000005890	ENSSSCG00000017555
ENSSSCG00000005895	ENSSSCG00000017578
ENSSSCG00000005901	ENSSSCG00000017636
ENSSSCG00000005908	ENSSSCG00000017637
ENSSSCG00000005917	ENSSSCG00000017645
ENSSSCG00000005918	ENSSSCG00000017702
ENSSSCG00000005920	ENSSSCG00000017705
ENSSSCG00000005925	ENSSSCG00000017775
ENSSSCG00000005927	ENSSSCG00000017840
ENSSSCG00000005968	ENSSSCG00000017884
ENSSSCG00000005969	ENSSSCG00000017983
ENSSSCG00000005973	ENSSSCG00000018093
ENSSSCG00000005987	ENSSSCG00000018104
ENSSSCG00000005996	ENSSSCG00000018162
ENSSSCG00000006017	ENSSSCG00000018175
ENSSSCG00000006024	ENSSSCG00000018214
ENSSSCG00000006029	ENSSSCG00000018244
ENSSSCG00000006037	ENSSSCG00000018253
ENSSSCG00000006039	ENSSSCG00000018285
ENSSSCG00000006048	ENSSSCG00000018305
ENSSSCG00000006049	ENSSSCG00000018306
ENSSSCG00000006065	ENSSSCG00000018307
ENSSSCG00000006066	ENSSSCG00000018309
ENSSSCG00000006067	ENSSSCG00000018364
ENSSSCG00000006070	ENSSSCG00000018377
ENSSSCG00000006080	ENSSSCG00000018389
ENSSSCG00000006084	ENSSSCG00000018425
ENSSSCG00000006093	ENSSSCG00000018435
ENSSSCG00000006098	ENSSSCG00000018439
ENSSSCG00000006110	ENSSSCG00000018451
ENSSSCG00000006120	ENSSSCG00000018453
ENSSSCG00000006144	ENSSSCG00000018475
ENSSSCG00000006145	ENSSSCG00000018477
ENSSSCG00000006151	ENSSSCG00000018485
ENSSSCG00000006155	ENSSSCG00000018490
ENSSSCG00000006157	ENSSSCG00000018520
ENSSSCG00000006177	ENSSSCG00000018524
ENSSSCG00000006184	ENSSSCG00000018533
ENSSSCG00000006194	ENSSSCG00000018558
ENSSSCG00000006203	ENSSSCG00000018563
ENSSSCG00000006209	ENSSSCG00000018576
ENSSSCG00000006214	ENSSSCG00000018579
ENSSSCG00000006220	ENSSSCG00000018581
ENSSSCG00000006239	ENSSSCG00000018590
ENSSSCG00000006242	ENSSSCG00000018596
ENSSSCG00000006251	ENSSSCG00000018598
ENSSSCG00000006280	ENSSSCG00000018604
ENSSSCG00000006285	ENSSSCG00000018610
ENSSSCG00000006294	ENSSSCG00000018614
ENSSSCG00000006301	ENSSSCG00000018617
ENSSSCG00000006302	ENSSSCG00000018620
ENSSSCG00000006310	ENSSSCG00000018635
ENSSSCG00000006318	ENSSSCG00000018638
ENSSSCG00000006340	ENSSSCG00000018651
ENSSSCG00000006342	ENSSSCG00000018694
ENSSSCG00000006347	ENSSSCG00000018695
ENSSSCG00000006360	ENSSSCG00000018702
ENSSSCG00000006361	ENSSSCG00000018716
ENSSSCG00000006366	ENSSSCG00000018726
ENSSSCG00000006371	ENSSSCG00000018731
ENSSSCG00000006386	ENSSSCG00000018738
ENSSSCG00000006467	ENSSSCG00000018750
ENSSSCG00000006468	ENSSSCG00000018751
ENSSSCG00000006469	ENSSSCG00000018793
ENSSSCG00000006470	ENSSSCG00000018823
ENSSSCG00000006471	ENSSSCG00000018834
ENSSSCG00000006480	ENSSSCG00000018872
ENSSSCG00000006481	ENSSSCG00000018879
ENSSSCG00000006487	ENSSSCG00000018884
ENSSSCG00000006490	ENSSSCG00000018886
ENSSSCG00000006493	ENSSSCG00000018891
ENSSSCG00000006494	ENSSSCG00000018918
ENSSSCG00000006499	ENSSSCG00000018925
ENSSSCG00000006500	ENSSSCG00000018938
ENSSSCG00000006504	ENSSSCG00000019045
ENSSSCG00000006507	ENSSSCG00000019048
ENSSSCG00000006508	ENSSSCG00000019051
ENSSSCG00000006510	ENSSSCG00000019061
ENSSSCG00000006519	ENSSSCG00000019078
ENSSSCG00000006520	ENSSSCG00000019121
ENSSSCG00000006522	ENSSSCG00000019140
ENSSSCG00000006523	ENSSSCG00000019142
ENSSSCG00000006536	ENSSSCG00000019160
ENSSSCG00000006540	ENSSSCG00000019179
ENSSSCG00000006544	ENSSSCG00000019216
ENSSSCG00000006552	ENSSSCG00000019224
ENSSSCG00000006562	ENSSSCG00000019225
ENSSSCG00000006571	ENSSSCG00000019227
ENSSSCG00000006619	ENSSSCG00000019255
ENSSSCG00000006623	ENSSSCG00000019270
ENSSSCG00000006626	ENSSSCG00000019292
ENSSSCG00000006627	ENSSSCG00000019295
ENSSSCG00000006628	ENSSSCG00000019296
ENSSSCG00000006630	ENSSSCG00000019307
ENSSSCG00000006632	ENSSSCG00000019309
ENSSSCG00000006661	ENSSSCG00000019316
ENSSSCG00000006663	ENSSSCG00000019334
ENSSSCG00000006665	ENSSSCG00000019354
ENSSSCG00000006667	ENSSSCG00000019364
ENSSSCG00000006689	ENSSSCG00000019380
ENSSSCG00000006691	ENSSSCG00000019397
ENSSSCG00000006697	ENSSSCG00000019416
ENSSSCG00000006718	ENSSSCG00000019427
ENSSSCG00000006721	ENSSSCG00000019430
ENSSSCG00000006727	ENSSSCG00000019492
ENSSSCG00000006730	ENSSSCG00000019526
ENSSSCG00000006751	ENSSSCG00000019575
ENSSSCG00000006756	ENSSSCG00000019588
ENSSSCG00000006762	ENSSSCG00000019590
ENSSSCG00000006766	ENSSSCG00000019601
ENSSSCG00000006768	ENSSSCG00000019619
ENSSSCG00000006779	ENSSSCG00000019632
ENSSSCG00000006783	ENSSSCG00000019644
ENSSSCG00000006799	ENSSSCG00000019673
ENSSSCG00000006826	ENSSSCG00000019683
ENSSSCG00000006828	ENSSSCG00000019714
ENSSSCG00000006830	ENSSSCG00000019715
ENSSSCG00000006835	ENSSSCG00000019726
ENSSSCG00000006839	ENSSSCG00000019773
ENSSSCG00000006841	ENSSSCG00000019811
ENSSSCG00000006843	ENSSSCG00000019821
ENSSSCG00000006845	ENSSSCG00000019827
ENSSSCG00000006859	ENSSSCG00000019843
ENSSSCG00000006865	ENSSSCG00000019846
ENSSSCG00000006866	ENSSSCG00000019849
ENSSSCG00000006869	ENSSSCG00000019853
ENSSSCG00000006870	ENSSSCG00000019861
ENSSSCG00000006873	ENSSSCG00000019897
ENSSSCG00000006883	ENSSSCG00000019921
ENSSSCG00000006892	ENSSSCG00000019971
ENSSSCG00000006896	ENSSSCG00000019976
ENSSSCG00000006903	ENSSSCG00000019977
ENSSSCG00000006913	ENSSSCG00000019978
ENSSSCG00000006926	ENSSSCG00000019991
ENSSSCG00000006927	ENSSSCG00000019992
ENSSSCG00000006939	ENSSSCG00000020042
ENSSSCG00000006956	ENSSSCG00000020066
ENSSSCG00000006959	ENSSSCG00000020075
ENSSSCG00000006988	ENSSSCG00000020079
ENSSSCG00000006993	ENSSSCG00000020129
ENSSSCG00000006994	ENSSSCG00000020149
ENSSSCG00000006996	ENSSSCG00000020189
ENSSSCG00000007004	ENSSSCG00000020231
ENSSSCG00000007019	ENSSSCG00000020243
ENSSSCG00000007031	ENSSSCG00000020250
ENSSSCG00000007046	ENSSSCG00000020275
ENSSSCG00000007077	ENSSSCG00000020289
ENSSSCG00000007089	ENSSSCG00000020321
ENSSSCG00000007093	ENSSSCG00000020336
ENSSSCG00000007095	ENSSSCG00000020344
ENSSSCG00000007098	ENSSSCG00000020437
ENSSSCG00000007108	ENSSSCG00000020444
ENSSSCG00000007117	ENSSSCG00000020445
ENSSSCG00000007119	ENSSSCG00000020471
ENSSSCG00000007142	ENSSSCG00000020582
ENSSSCG00000007160	ENSSSCG00000020591
ENSSSCG00000007168	ENSSSCG00000020608
ENSSSCG00000007170	ENSSSCG00000020631
ENSSSCG00000007178	ENSSSCG00000020688
ENSSSCG00000007187	ENSSSCG00000020702
ENSSSCG00000007188	ENSSSCG00000020741
ENSSSCG00000007203	ENSSSCG00000020756
ENSSSCG00000007206	ENSSSCG00000020828
ENSSSCG00000007237	ENSSSCG00000020863
ENSSSCG00000007244	ENSSSCG00000020881
ENSSSCG00000007246	ENSSSCG00000020883
ENSSSCG00000007248	ENSSSCG00000020903
ENSSSCG00000007251	ENSSSCG00000020922
ENSSSCG00000007270	ENSSSCG00000020960
ENSSSCG00000007279	ENSSSCG00000020961
ENSSSCG00000007282	ENSSSCG00000020985
ENSSSCG00000007284	ENSSSCG00000021000
ENSSSCG00000007289	ENSSSCG00000021120
ENSSSCG00000007301	ENSSSCG00000021127
ENSSSCG00000007308	ENSSSCG00000021130
ENSSSCG00000007311	ENSSSCG00000021143
ENSSSCG00000007312	ENSSSCG00000021204
ENSSSCG00000007323	ENSSSCG00000021226
ENSSSCG00000007330	ENSSSCG00000021278
ENSSSCG00000007337	ENSSSCG00000021285
ENSSSCG00000007340	ENSSSCG00000021326
ENSSSCG00000007342	ENSSSCG00000021334
ENSSSCG00000007345	ENSSSCG00000021339
ENSSSCG00000007349	ENSSSCG00000021362
ENSSSCG00000007352	ENSSSCG00000021413
ENSSSCG00000007360	ENSSSCG00000021415
ENSSSCG00000007395	ENSSSCG00000021444
ENSSSCG00000007422	ENSSSCG00000021458
ENSSSCG00000007425	ENSSSCG00000021474
ENSSSCG00000007426	ENSSSCG00000021475
ENSSSCG00000007427	ENSSSCG00000021507
ENSSSCG00000007428	ENSSSCG00000021612
ENSSSCG00000007432	ENSSSCG00000021635
ENSSSCG00000007433	ENSSSCG00000021647
ENSSSCG00000007438	ENSSSCG00000021655
ENSSSCG00000007451	ENSSSCG00000021661
ENSSSCG00000007452	ENSSSCG00000021698
ENSSSCG00000007459	ENSSSCG00000021777
ENSSSCG00000007460	ENSSSCG00000021803
ENSSSCG00000007465	ENSSSCG00000021818
ENSSSCG00000007466	ENSSSCG00000021822
ENSSSCG00000007475	ENSSSCG00000021866
ENSSSCG00000007487	ENSSSCG00000021872
ENSSSCG00000007496	ENSSSCG00000021911
ENSSSCG00000007513	ENSSSCG00000021938
ENSSSCG00000007540	ENSSSCG00000021941
ENSSSCG00000007550	ENSSSCG00000021957
ENSSSCG00000007558	ENSSSCG00000021987
ENSSSCG00000007576	ENSSSCG00000022035
ENSSSCG00000007580	ENSSSCG00000022080
ENSSSCG00000007594	ENSSSCG00000022093
ENSSSCG00000007615	ENSSSCG00000022107
ENSSSCG00000007622	ENSSSCG00000022142
ENSSSCG00000007637	ENSSSCG00000022143
ENSSSCG00000007643	ENSSSCG00000022175
ENSSSCG00000007646	ENSSSCG00000022177
ENSSSCG00000007664	ENSSSCG00000022215
ENSSSCG00000007669	ENSSSCG00000022228
ENSSSCG00000007672	ENSSSCG00000022230
ENSSSCG00000007684	ENSSSCG00000022254
ENSSSCG00000007686	ENSSSCG00000022262
ENSSSCG00000007704	ENSSSCG00000022276
ENSSSCG00000007705	ENSSSCG00000022309
ENSSSCG00000007708	ENSSSCG00000022372
ENSSSCG00000007709	ENSSSCG00000022380
ENSSSCG00000007732	ENSSSCG00000022409
ENSSSCG00000007733	ENSSSCG00000022410
ENSSSCG00000007735	ENSSSCG00000022420
ENSSSCG00000007736	ENSSSCG00000022426
ENSSSCG00000007746	ENSSSCG00000022435
ENSSSCG00000007767	ENSSSCG00000022459
ENSSSCG00000007780	ENSSSCG00000022493
ENSSSCG00000007782	ENSSSCG00000022594
ENSSSCG00000007785	ENSSSCG00000022597
ENSSSCG00000007786	ENSSSCG00000022663
ENSSSCG00000007789	ENSSSCG00000022692
ENSSSCG00000007801	ENSSSCG00000022701
ENSSSCG00000007808	ENSSSCG00000022722
ENSSSCG00000007815	ENSSSCG00000022725
ENSSSCG00000007826	ENSSSCG00000022779
ENSSSCG00000007840	ENSSSCG00000022789
ENSSSCG00000007853	ENSSSCG00000022816
ENSSSCG00000007854	ENSSSCG00000022823
ENSSSCG00000007878	ENSSSCG00000022873
ENSSSCG00000007879	ENSSSCG00000022876
ENSSSCG00000007881	ENSSSCG00000022893
ENSSSCG00000007914	ENSSSCG00000022928
ENSSSCG00000007931	ENSSSCG00000022930
ENSSSCG00000007935	ENSSSCG00000022940
ENSSSCG00000007943	ENSSSCG00000022965
ENSSSCG00000007952	ENSSSCG00000022966
ENSSSCG00000007955	ENSSSCG00000022972
ENSSSCG00000007958	ENSSSCG00000022981
ENSSSCG00000007962	ENSSSCG00000022997
ENSSSCG00000007963	ENSSSCG00000023006
ENSSSCG00000007965	ENSSSCG00000023025
ENSSSCG00000007967	ENSSSCG00000023029
ENSSSCG00000007970	ENSSSCG00000023036
ENSSSCG00000007981	ENSSSCG00000023037
ENSSSCG00000007984	ENSSSCG00000023038
ENSSSCG00000007986	ENSSSCG00000023042
ENSSSCG00000007992	ENSSSCG00000023066
ENSSSCG00000007993	ENSSSCG00000023091
ENSSSCG00000008004	ENSSSCG00000023099
ENSSSCG00000008016	ENSSSCG00000023100
ENSSSCG00000008020	ENSSSCG00000023102
ENSSSCG00000008022	ENSSSCG00000023121
ENSSSCG00000008026	ENSSSCG00000023136
ENSSSCG00000008030	ENSSSCG00000023151
ENSSSCG00000008031	ENSSSCG00000023165
ENSSSCG00000008035	ENSSSCG00000023180
ENSSSCG00000008040	ENSSSCG00000023189
ENSSSCG00000008043	ENSSSCG00000023215
ENSSSCG00000008047	ENSSSCG00000023224
ENSSSCG00000008060	ENSSSCG00000023253
ENSSSCG00000008061	ENSSSCG00000023293
ENSSSCG00000008068	ENSSSCG00000023316
ENSSSCG00000008069	ENSSSCG00000023343
ENSSSCG00000008076	ENSSSCG00000023352
ENSSSCG00000008079	ENSSSCG00000023410
ENSSSCG00000008080	ENSSSCG00000023429
ENSSSCG00000008096	ENSSSCG00000023430
ENSSSCG00000008099	ENSSSCG00000023433
ENSSSCG00000008107	ENSSSCG00000023443
ENSSSCG00000008113	ENSSSCG00000023454
ENSSSCG00000008114	ENSSSCG00000023483
ENSSSCG00000008129	ENSSSCG00000023500
ENSSSCG00000008133	ENSSSCG00000023512
ENSSSCG00000008143	ENSSSCG00000023522
ENSSSCG00000008172	ENSSSCG00000023545
ENSSSCG00000008180	ENSSSCG00000023551
ENSSSCG00000008181	ENSSSCG00000023556
ENSSSCG00000008183	ENSSSCG00000023570
ENSSSCG00000008185	ENSSSCG00000023575
ENSSSCG00000008194	ENSSSCG00000023578
ENSSSCG00000008202	ENSSSCG00000023590
ENSSSCG00000008221	ENSSSCG00000023612
ENSSSCG00000008222	ENSSSCG00000023679
ENSSSCG00000008232	ENSSSCG00000023701
ENSSSCG00000008235	ENSSSCG00000023731
ENSSSCG00000008267	ENSSSCG00000023732
ENSSSCG00000008268	ENSSSCG00000023739
ENSSSCG00000008270	ENSSSCG00000023748
ENSSSCG00000008300	ENSSSCG00000023766
ENSSSCG00000008305	ENSSSCG00000023770
ENSSSCG00000008332	ENSSSCG00000023796
ENSSSCG00000008334	ENSSSCG00000023801
ENSSSCG00000008339	ENSSSCG00000023804
ENSSSCG00000008346	ENSSSCG00000023813
ENSSSCG00000008347	ENSSSCG00000023815
ENSSSCG00000008352	ENSSSCG00000023833
ENSSSCG00000008372	ENSSSCG00000023839
ENSSSCG00000008376	ENSSSCG00000023853
ENSSSCG00000008377	ENSSSCG00000023877
ENSSSCG00000008382	ENSSSCG00000023897
ENSSSCG00000008387	ENSSSCG00000023926
ENSSSCG00000008398	ENSSSCG00000023937
ENSSSCG00000008399	ENSSSCG00000023958
ENSSSCG00000008414	ENSSSCG00000023960
ENSSSCG00000008415	ENSSSCG00000023970
ENSSSCG00000008436	ENSSSCG00000023990
ENSSSCG00000008440	ENSSSCG00000023999
ENSSSCG00000008459	ENSSSCG00000024031
ENSSSCG00000008464	ENSSSCG00000024064
ENSSSCG00000008470	ENSSSCG00000024086
ENSSSCG00000008475	ENSSSCG00000024091
ENSSSCG00000008476	ENSSSCG00000024099
ENSSSCG00000008478	ENSSSCG00000024126
ENSSSCG00000008479	ENSSSCG00000024127
ENSSSCG00000008482	ENSSSCG00000024258
ENSSSCG00000008487	ENSSSCG00000024289
ENSSSCG00000008493	ENSSSCG00000024291
ENSSSCG00000008497	ENSSSCG00000024296
ENSSSCG00000008508	ENSSSCG00000024310
ENSSSCG00000008514	ENSSSCG00000024315
ENSSSCG00000008515	ENSSSCG00000024347
ENSSSCG00000008516	ENSSSCG00000024409
ENSSSCG00000008517	ENSSSCG00000024423
ENSSSCG00000008536	ENSSSCG00000024435
ENSSSCG00000008537	ENSSSCG00000024458
ENSSSCG00000008538	ENSSSCG00000024483
ENSSSCG00000008540	ENSSSCG00000024487
ENSSSCG00000008542	ENSSSCG00000024506
ENSSSCG00000008546	ENSSSCG00000024514
ENSSSCG00000008548	ENSSSCG00000024580
ENSSSCG00000008549	ENSSSCG00000024585
ENSSSCG00000008553	ENSSSCG00000024650
ENSSSCG00000008554	ENSSSCG00000024660
ENSSSCG00000008559	ENSSSCG00000024680
ENSSSCG00000008573	ENSSSCG00000024682
ENSSSCG00000008579	ENSSSCG00000024728
ENSSSCG00000008580	ENSSSCG00000024730
ENSSSCG00000008581	ENSSSCG00000024790
ENSSSCG00000008587	ENSSSCG00000024813
ENSSSCG00000008600	ENSSSCG00000024821
ENSSSCG00000008602	ENSSSCG00000024865
ENSSSCG00000008605	ENSSSCG00000024889
ENSSSCG00000008608	ENSSSCG00000024890
ENSSSCG00000008621	ENSSSCG00000024900
ENSSSCG00000008635	ENSSSCG00000024908
ENSSSCG00000008636	ENSSSCG00000024913
ENSSSCG00000008637	ENSSSCG00000024921
ENSSSCG00000008640	ENSSSCG00000024934
ENSSSCG00000008668	ENSSSCG00000024940
ENSSSCG00000008675	ENSSSCG00000024947
ENSSSCG00000008678	ENSSSCG00000024950
ENSSSCG00000008681	ENSSSCG00000024975
ENSSSCG00000008685	ENSSSCG00000025005
ENSSSCG00000008691	ENSSSCG00000025026
ENSSSCG00000008693	ENSSSCG00000025044
ENSSSCG00000008697	ENSSSCG00000025050
ENSSSCG00000008713	ENSSSCG00000025051
ENSSSCG00000008724	ENSSSCG00000025069
ENSSSCG00000008728	ENSSSCG00000025074
ENSSSCG00000008732	ENSSSCG00000025077
ENSSSCG00000008735	ENSSSCG00000025084
ENSSSCG00000008748	ENSSSCG00000025113
ENSSSCG00000008750	ENSSSCG00000025156
ENSSSCG00000008756	ENSSSCG00000025163
ENSSSCG00000008772	ENSSSCG00000025193
ENSSSCG00000008788	ENSSSCG00000025209
ENSSSCG00000008790	ENSSSCG00000025268
ENSSSCG00000008808	ENSSSCG00000025278
ENSSSCG00000008821	ENSSSCG00000025298
ENSSSCG00000008836	ENSSSCG00000025356
ENSSSCG00000008860	ENSSSCG00000025362
ENSSSCG00000008866	ENSSSCG00000025366
ENSSSCG00000008878	ENSSSCG00000025370
ENSSSCG00000008881	ENSSSCG00000025371
ENSSSCG00000008890	ENSSSCG00000025397
ENSSSCG00000008892	ENSSSCG00000025466
ENSSSCG00000008900	ENSSSCG00000025529
ENSSSCG00000008909	ENSSSCG00000025546
ENSSSCG00000008911	ENSSSCG00000025575
ENSSSCG00000008920	ENSSSCG00000025585
ENSSSCG00000008924	ENSSSCG00000025595
ENSSSCG00000008947	ENSSSCG00000025598
ENSSSCG00000008974	ENSSSCG00000025610
ENSSSCG00000008980	ENSSSCG00000025621
ENSSSCG00000008990	ENSSSCG00000025633
ENSSSCG00000009015	ENSSSCG00000025643
ENSSSCG00000009029	ENSSSCG00000025658
ENSSSCG00000009030	ENSSSCG00000025701
ENSSSCG00000009035	ENSSSCG00000025712
ENSSSCG00000009043	ENSSSCG00000025722
ENSSSCG00000009044	ENSSSCG00000025730
ENSSSCG00000009047	ENSSSCG00000025732
ENSSSCG00000009061	ENSSSCG00000025817
ENSSSCG00000009069	ENSSSCG00000025839
ENSSSCG00000009071	ENSSSCG00000025879
ENSSSCG00000009074	ENSSSCG00000025887
ENSSSCG00000009075	ENSSSCG00000025901
ENSSSCG00000009084	ENSSSCG00000025925
ENSSSCG00000009090	ENSSSCG00000025931
ENSSSCG00000009096	ENSSSCG00000025938
ENSSSCG00000009113	ENSSSCG00000025950
ENSSSCG00000009119	ENSSSCG00000025961
ENSSSCG00000009128	ENSSSCG00000025963
ENSSSCG00000009139	ENSSSCG00000025967
ENSSSCG00000009142	ENSSSCG00000025976
ENSSSCG00000009164	ENSSSCG00000025979
ENSSSCG00000009176	ENSSSCG00000025982
ENSSSCG00000009186	ENSSSCG00000025985
ENSSSCG00000009211	ENSSSCG00000026005
ENSSSCG00000009226	ENSSSCG00000026033
ENSSSCG00000009234	ENSSSCG00000026046
ENSSSCG00000009236	ENSSSCG00000026056
ENSSSCG00000009241	ENSSSCG00000026069
ENSSSCG00000009242	ENSSSCG00000026116
ENSSSCG00000009243	ENSSSCG00000026135
ENSSSCG00000009259	ENSSSCG00000026173
ENSSSCG00000009276	ENSSSCG00000026231
ENSSSCG00000009302	ENSSSCG00000026256
ENSSSCG00000009305	ENSSSCG00000026301
ENSSSCG00000009309	ENSSSCG00000026327
ENSSSCG00000009320	ENSSSCG00000026343
ENSSSCG00000009327	ENSSSCG00000026354
ENSSSCG00000009345	ENSSSCG00000026368
ENSSSCG00000009353	ENSSSCG00000026389
ENSSSCG00000009356	ENSSSCG00000026399
ENSSSCG00000009359	ENSSSCG00000026412
ENSSSCG00000009370	ENSSSCG00000026432
ENSSSCG00000009372	ENSSSCG00000026436
ENSSSCG00000009381	ENSSSCG00000026443
ENSSSCG00000009390	ENSSSCG00000026448
ENSSSCG00000009400	ENSSSCG00000026499
ENSSSCG00000009401	ENSSSCG00000026509
ENSSSCG00000009407	ENSSSCG00000026512
ENSSSCG00000009414	ENSSSCG00000026516
ENSSSCG00000009419	ENSSSCG00000026530
ENSSSCG00000009420	ENSSSCG00000026573
ENSSSCG00000009425	ENSSSCG00000026575
ENSSSCG00000009427	ENSSSCG00000026602
ENSSSCG00000009435	ENSSSCG00000026609
ENSSSCG00000009436	ENSSSCG00000026630
ENSSSCG00000009437	ENSSSCG00000026669
ENSSSCG00000009441	ENSSSCG00000026675
ENSSSCG00000009449	ENSSSCG00000026681
ENSSSCG00000009460	ENSSSCG00000026695
ENSSSCG00000009466	ENSSSCG00000026719
ENSSSCG00000009492	ENSSSCG00000026738
ENSSSCG00000009508	ENSSSCG00000026747
ENSSSCG00000009509	ENSSSCG00000026752
ENSSSCG00000009513	ENSSSCG00000026770
ENSSSCG00000009531	ENSSSCG00000026815
ENSSSCG00000009532	ENSSSCG00000026839
ENSSSCG00000009533	ENSSSCG00000026884
ENSSSCG00000009534	ENSSSCG00000026887
ENSSSCG00000009541	ENSSSCG00000026888
ENSSSCG00000009551	ENSSSCG00000026899
ENSSSCG00000009553	ENSSSCG00000026906
ENSSSCG00000009563	ENSSSCG00000026965
ENSSSCG00000009568	ENSSSCG00000026975
ENSSSCG00000009569	ENSSSCG00000027008
ENSSSCG00000009574	ENSSSCG00000027016
ENSSSCG00000009620	ENSSSCG00000027032
ENSSSCG00000009640	ENSSSCG00000027039
ENSSSCG00000009657	ENSSSCG00000027080
ENSSSCG00000009663	ENSSSCG00000027084
ENSSSCG00000009692	ENSSSCG00000027114
ENSSSCG00000009713	ENSSSCG00000027121
ENSSSCG00000009732	ENSSSCG00000027127
ENSSSCG00000009733	ENSSSCG00000027158
ENSSSCG00000009739	ENSSSCG00000027170
ENSSSCG00000009743	ENSSSCG00000027171
ENSSSCG00000009744	ENSSSCG00000027174
ENSSSCG00000009746	ENSSSCG00000027180
ENSSSCG00000009758	ENSSSCG00000027331
ENSSSCG00000009763	ENSSSCG00000027335
ENSSSCG00000009769	ENSSSCG00000027337
ENSSSCG00000009771	ENSSSCG00000027343
ENSSSCG00000009772	ENSSSCG00000027381
ENSSSCG00000009774	ENSSSCG00000027420
ENSSSCG00000009777	ENSSSCG00000027424
ENSSSCG00000009781	ENSSSCG00000027451
ENSSSCG00000009782	ENSSSCG00000027476
ENSSSCG00000009783	ENSSSCG00000027539
ENSSSCG00000009801	ENSSSCG00000027582
ENSSSCG00000009808	ENSSSCG00000027588
ENSSSCG00000009811	ENSSSCG00000027589
ENSSSCG00000009814	ENSSSCG00000027603
ENSSSCG00000009820	ENSSSCG00000027621
ENSSSCG00000009823	ENSSSCG00000027625
ENSSSCG00000009826	ENSSSCG00000027634
ENSSSCG00000009849	ENSSSCG00000027650
ENSSSCG00000009851	ENSSSCG00000027651
ENSSSCG00000009858	ENSSSCG00000027653
ENSSSCG00000009866	ENSSSCG00000027669
ENSSSCG00000009890	ENSSSCG00000027682
ENSSSCG00000009901	ENSSSCG00000027749
ENSSSCG00000009917	ENSSSCG00000027764
ENSSSCG00000009930	ENSSSCG00000027797
ENSSSCG00000009933	ENSSSCG00000027806
ENSSSCG00000009940	ENSSSCG00000027807
ENSSSCG00000009946	ENSSSCG00000027809
ENSSSCG00000009953	ENSSSCG00000027830
ENSSSCG00000009971	ENSSSCG00000027849
ENSSSCG00000010000	ENSSSCG00000027921
ENSSSCG00000010002	ENSSSCG00000027938
ENSSSCG00000010010	ENSSSCG00000027981
ENSSSCG00000010016	ENSSSCG00000027989
ENSSSCG00000010027	ENSSSCG00000027996
ENSSSCG00000010029	ENSSSCG00000028044
ENSSSCG00000010030	ENSSSCG00000028054
ENSSSCG00000010031	ENSSSCG00000028063
ENSSSCG00000010032	ENSSSCG00000028075
ENSSSCG00000010033	ENSSSCG00000028142
ENSSSCG00000010055	ENSSSCG00000028166
ENSSSCG00000010062	ENSSSCG00000028173
ENSSSCG00000010083	ENSSSCG00000028182
ENSSSCG00000010094	ENSSSCG00000028203
ENSSSCG00000010095	ENSSSCG00000028268
ENSSSCG00000010098	ENSSSCG00000028294
ENSSSCG00000010103	ENSSSCG00000028299
ENSSSCG00000010108	ENSSSCG00000028380
ENSSSCG00000010110	ENSSSCG00000028382
ENSSSCG00000010111	ENSSSCG00000028404
ENSSSCG00000010114	ENSSSCG00000028412
ENSSSCG00000010130	ENSSSCG00000028422
ENSSSCG00000010131	ENSSSCG00000028427
ENSSSCG00000010134	ENSSSCG00000028484
ENSSSCG00000010136	ENSSSCG00000028493
ENSSSCG00000010137	ENSSSCG00000028498
ENSSSCG00000010154	ENSSSCG00000028513
ENSSSCG00000010156	ENSSSCG00000028527
ENSSSCG00000010157	ENSSSCG00000028544
ENSSSCG00000010161	ENSSSCG00000028564
ENSSSCG00000010167	ENSSSCG00000028574
ENSSSCG00000010169	ENSSSCG00000028591
ENSSSCG00000010175	ENSSSCG00000028596
ENSSSCG00000010176	ENSSSCG00000028648
ENSSSCG00000010183	ENSSSCG00000028681
ENSSSCG00000010185	ENSSSCG00000028686
ENSSSCG00000010186	ENSSSCG00000028761
ENSSSCG00000010188	ENSSSCG00000028762
ENSSSCG00000010196	ENSSSCG00000028793
ENSSSCG00000010211	ENSSSCG00000028799
ENSSSCG00000010219	ENSSSCG00000028834
ENSSSCG00000010223	ENSSSCG00000028865
ENSSSCG00000010238	ENSSSCG00000028895
ENSSSCG00000010243	ENSSSCG00000028953
ENSSSCG00000010246	ENSSSCG00000028982
ENSSSCG00000010250	ENSSSCG00000028998
ENSSSCG00000010251	ENSSSCG00000029032
ENSSSCG00000010258	ENSSSCG00000029049
ENSSSCG00000010260	ENSSSCG00000029071
ENSSSCG00000010289	ENSSSCG00000029082
ENSSSCG00000010294	ENSSSCG00000029106
ENSSSCG00000010296	ENSSSCG00000029115
ENSSSCG00000010297	ENSSSCG00000029122
ENSSSCG00000010310	ENSSSCG00000029160
ENSSSCG00000010314	ENSSSCG00000029163
ENSSSCG00000010316	ENSSSCG00000029234
ENSSSCG00000010319	ENSSSCG00000029252
ENSSSCG00000010327	ENSSSCG00000029275
ENSSSCG00000010351	ENSSSCG00000029309
ENSSSCG00000010360	ENSSSCG00000029361
ENSSSCG00000010416	ENSSSCG00000029392
ENSSSCG00000010433	ENSSSCG00000029397
ENSSSCG00000010438	ENSSSCG00000029440
ENSSSCG00000010441	ENSSSCG00000029455
ENSSSCG00000010465	ENSSSCG00000029465
ENSSSCG00000010468	ENSSSCG00000029472
ENSSSCG00000010469	ENSSSCG00000029496
ENSSSCG00000010470	ENSSSCG00000029511
ENSSSCG00000010473	ENSSSCG00000029556
ENSSSCG00000010502	ENSSSCG00000029559
ENSSSCG00000010508	ENSSSCG00000029569
ENSSSCG00000010511	ENSSSCG00000029608
ENSSSCG00000010514	ENSSSCG00000029610
ENSSSCG00000010518	ENSSSCG00000029645
ENSSSCG00000010519	ENSSSCG00000029682
ENSSSCG00000010520	ENSSSCG00000029718
ENSSSCG00000010528	ENSSSCG00000029744
ENSSSCG00000010531	ENSSSCG00000029770
ENSSSCG00000010539	ENSSSCG00000029788
ENSSSCG00000010550	ENSSSCG00000029796
ENSSSCG00000010551	ENSSSCG00000029810
ENSSSCG00000010560	ENSSSCG00000029821
ENSSSCG00000010564	ENSSSCG00000029827
ENSSSCG00000010566	ENSSSCG00000029830
ENSSSCG00000010569	ENSSSCG00000029885
ENSSSCG00000010571	ENSSSCG00000029916
ENSSSCG00000010574	ENSSSCG00000029931
ENSSSCG00000010575	ENSSSCG00000029946
ENSSSCG00000010576	ENSSSCG00000029976
ENSSSCG00000010587	ENSSSCG00000029987
ENSSSCG00000010605	ENSSSCG00000030023
ENSSSCG00000010620	ENSSSCG00000030026
ENSSSCG00000010627	ENSSSCG00000030047
ENSSSCG00000010628	ENSSSCG00000030116
ENSSSCG00000010634	ENSSSCG00000030117
ENSSSCG00000010648	ENSSSCG00000030158
ENSSSCG00000010669	ENSSSCG00000030159
ENSSSCG00000010676	ENSSSCG00000030175
ENSSSCG00000010680	ENSSSCG00000030197
ENSSSCG00000010699	ENSSSCG00000030198
ENSSSCG00000010719	ENSSSCG00000030221
ENSSSCG00000010721	ENSSSCG00000030229
ENSSSCG00000010726	ENSSSCG00000030230
ENSSSCG00000010737	ENSSSCG00000030237
ENSSSCG00000010741	ENSSSCG00000030262
ENSSSCG00000010743	ENSSSCG00000030310
ENSSSCG00000010748	ENSSSCG00000030319
ENSSSCG00000010759	ENSSSCG00000030346
ENSSSCG00000010774	ENSSSCG00000030347
ENSSSCG00000010793	ENSSSCG00000030357
ENSSSCG00000010797	ENSSSCG00000030451
ENSSSCG00000010799	ENSSSCG00000030461
ENSSSCG00000010802	ENSSSCG00000030463
ENSSSCG00000010805	ENSSSCG00000030571
ENSSSCG00000010821	ENSSSCG00000030660
ENSSSCG00000010822	ENSSSCG00000030719
ENSSSCG00000010823	ENSSSCG00000030749
ENSSSCG00000010824	ENSSSCG00000030752
ENSSSCG00000010833	ENSSSCG00000030780
ENSSSCG00000010836	ENSSSCG00000030781
ENSSSCG00000010844	ENSSSCG00000030788
ENSSSCG00000010862	ENSSSCG00000030794
ENSSSCG00000010863	ENSSSCG00000030803
ENSSSCG00000010866	ENSSSCG00000030804
ENSSSCG00000010871	ENSSSCG00000030815
ENSSSCG00000010874	ENSSSCG00000030827
ENSSSCG00000010876	ENSSSCG00000030845
ENSSSCG00000010880	ENSSSCG00000030857
ENSSSCG00000010881	ENSSSCG00000030894
ENSSSCG00000010884	ENSSSCG00000030900
ENSSSCG00000010897	ENSSSCG00000030908
ENSSSCG00000010900	ENSSSCG00000030914
ENSSSCG00000010930	ENSSSCG00000030920
ENSSSCG00000010931	ENSSSCG00000030958
ENSSSCG00000010935	ENSSSCG00000030970
ENSSSCG00000010956	ENSSSCG00000030982
ENSSSCG00000010973	ENSSSCG00000030987
ENSSSCG00000010981	ENSSSCG00000031013
ENSSSCG00000010993	ENSSSCG00000031017
ENSSSCG00000010996	ENSSSCG00000031019
ENSSSCG00000010999	ENSSSCG00000031029
ENSSSCG00000011001	ENSSSCG00000031038
ENSSSCG00000011018	ENSSSCG00000031042
ENSSSCG00000011023	ENSSSCG00000031052
ENSSSCG00000011036
ENSSSCG00000011052
ENSSSCG00000011064
ENSSSCG00000011068
ENSSSCG00000011081
ENSSSCG00000011085
ENSSSCG00000011105
ENSSSCG00000011107
ENSSSCG00000011127
ENSSSCG00000011162
ENSSSCG00000011167
ENSSSCG00000011169
ENSSSCG00000011183
ENSSSCG00000011194
ENSSSCG00000011233
ENSSSCG00000011252
ENSSSCG00000011253
ENSSSCG00000011258
ENSSSCG00000011271
ENSSSCG00000011282
ENSSSCG00000011284
ENSSSCG00000011292
ENSSSCG00000011294
ENSSSCG00000011302
ENSSSCG00000011304
ENSSSCG00000011306
ENSSSCG00000011307
ENSSSCG00000011308
ENSSSCG00000011347
ENSSSCG00000011352
ENSSSCG00000011358
ENSSSCG00000011359
ENSSSCG00000011373
ENSSSCG00000011382
ENSSSCG00000011394
ENSSSCG00000011406
ENSSSCG00000011411
ENSSSCG00000011415
ENSSSCG00000011420
ENSSSCG00000011433
ENSSSCG00000011446
ENSSSCG00000011447
ENSSSCG00000011448
ENSSSCG00000011449
ENSSSCG00000011454
ENSSSCG00000011458
ENSSSCG00000011459
ENSSSCG00000011465
ENSSSCG00000011466
ENSSSCG00000011468
ENSSSCG00000011473
ENSSSCG00000011474
ENSSSCG00000011485
ENSSSCG00000011491
ENSSSCG00000011506
ENSSSCG00000011510
ENSSSCG00000011518
ENSSSCG00000011529
ENSSSCG00000011531
ENSSSCG00000011534
ENSSSCG00000011535
ENSSSCG00000011540
ENSSSCG00000011548
ENSSSCG00000011549
ENSSSCG00000011551
ENSSSCG00000011555
ENSSSCG00000011558
ENSSSCG00000011562
ENSSSCG00000011567
ENSSSCG00000011569
ENSSSCG00000011572
ENSSSCG00000011575
ENSSSCG00000011593
ENSSSCG00000011594
ENSSSCG00000011613
ENSSSCG00000011615
ENSSSCG00000011616
ENSSSCG00000011620
ENSSSCG00000011623
ENSSSCG00000011632
ENSSSCG00000011637
ENSSSCG00000011642
ENSSSCG00000011645
ENSSSCG00000011658
ENSSSCG00000011662
ENSSSCG00000011670
ENSSSCG00000011677
ENSSSCG00000011684
ENSSSCG00000011708
ENSSSCG00000011710
ENSSSCG00000011725
ENSSSCG00000011739
ENSSSCG00000011746
ENSSSCG00000011762
ENSSSCG00000011763
ENSSSCG00000011767
ENSSSCG00000011772
ENSSSCG00000011779
ENSSSCG00000011783
ENSSSCG00000011788
ENSSSCG00000011794
ENSSSCG00000011797
ENSSSCG00000011798
ENSSSCG00000011827
ENSSSCG00000011841
ENSSSCG00000011845
ENSSSCG00000011853
ENSSSCG00000011873
ENSSSCG00000011881
ENSSSCG00000011897
ENSSSCG00000011913
ENSSSCG00000011924
ENSSSCG00000011929
ENSSSCG00000011930
ENSSSCG00000011943
ENSSSCG00000011953
ENSSSCG00000011955
ENSSSCG00000011956
ENSSSCG00000011961
ENSSSCG00000011977
ENSSSCG00000011997
ENSSSCG00000012036
ENSSSCG00000012059
ENSSSCG00000012061
ENSSSCG00000012063
ENSSSCG00000012084
ENSSSCG00000012088
ENSSSCG00000012179
ENSSSCG00000012252
ENSSSCG00000012264
ENSSSCG00000012265
ENSSSCG00000012314
ENSSSCG00000012326
ENSSSCG00000012391
ENSSSCG00000012410
ENSSSCG00000012419
ENSSSCG00000012433
ENSSSCG00000012489
ENSSSCG00000012556
ENSSSCG00000012560
ENSSSCG00000012564
ENSSSCG00000012578
ENSSSCG00000012603
ENSSSCG00000012617
ENSSSCG00000012621
ENSSSCG00000012622
ENSSSCG00000012655
ENSSSCG00000012682
ENSSSCG00000012691
ENSSSCG00000012732
ENSSSCG00000012741
ENSSSCG00000012767
ENSSSCG00000012783
ENSSSCG00000012811
ENSSSCG00000012849
ENSSSCG00000012850
ENSSSCG00000012857
ENSSSCG00000012861
ENSSSCG00000012874
ENSSSCG00000012878
ENSSSCG00000012879
ENSSSCG00000012902
ENSSSCG00000012904
ENSSSCG00000012910
ENSSSCG00000012927
ENSSSCG00000012939
ENSSSCG00000012963
ENSSSCG00000012966
ENSSSCG00000012969
ENSSSCG00000012978
ENSSSCG00000012979
ENSSSCG00000012980
ENSSSCG00000012984
ENSSSCG00000012995
ENSSSCG00000013001
ENSSSCG00000013003
ENSSSCG00000013005
ENSSSCG00000013011
ENSSSCG00000013013
ENSSSCG00000013019
ENSSSCG00000013029
ENSSSCG00000013033
ENSSSCG00000013035
ENSSSCG00000013038
ENSSSCG00000013039
ENSSSCG00000013063
ENSSSCG00000013066
ENSSSCG00000013082
ENSSSCG00000013083
ENSSSCG00000013085
ENSSSCG00000013094
ENSSSCG00000013125
ENSSSCG00000013176
ENSSSCG00000013177
ENSSSCG00000013225
ENSSSCG00000013226
ENSSSCG00000013238
ENSSSCG00000013239
ENSSSCG00000013245
ENSSSCG00000013257
ENSSSCG00000013258
ENSSSCG00000013264
ENSSSCG00000013270
ENSSSCG00000013282
ENSSSCG00000013284
ENSSSCG00000013291
ENSSSCG00000013298
ENSSSCG00000013304
ENSSSCG00000013305
ENSSSCG00000013308
ENSSSCG00000013312
ENSSSCG00000013322
ENSSSCG00000013331
ENSSSCG00000013347
ENSSSCG00000013349
ENSSSCG00000013367
ENSSSCG00000013371
ENSSSCG00000013383
ENSSSCG00000013389
ENSSSCG00000013392
ENSSSCG00000013397
ENSSSCG00000013402
ENSSSCG00000013404
ENSSSCG00000013406
ENSSSCG00000013416
ENSSSCG00000013419
ENSSSCG00000013423
ENSSSCG00000013442
ENSSSCG00000013444
ENSSSCG00000013445
ENSSSCG00000013446
ENSSSCG00000013453
ENSSSCG00000013455
ENSSSCG00000013460
ENSSSCG00000013463
ENSSSCG00000013467
ENSSSCG00000013468
ENSSSCG00000013470
ENSSSCG00000013475
ENSSSCG00000013478
ENSSSCG00000013492
ENSSSCG00000013499
ENSSSCG00000013500
ENSSSCG00000013510
ENSSSCG00000013534
ENSSSCG00000013539
ENSSSCG00000013570
ENSSSCG00000013573
ENSSSCG00000013582
ENSSSCG00000013600
ENSSSCG00000013601
ENSSSCG00000013607
ENSSSCG00000013619
ENSSSCG00000013631
ENSSSCG00000013647
ENSSSCG00000013656
ENSSSCG00000013662
ENSSSCG00000013670
ENSSSCG00000013721
ENSSSCG00000013722
ENSSSCG00000013723
ENSSSCG00000013728
ENSSSCG00000013736
ENSSSCG00000013737
ENSSSCG00000013744
ENSSSCG00000013745
ENSSSCG00000013748
ENSSSCG00000013755
ENSSSCG00000013756
ENSSSCG00000013758
ENSSSCG00000013761
ENSSSCG00000013763
ENSSSCG00000013764
ENSSSCG00000013771
ENSSSCG00000013780
ENSSSCG00000013784
ENSSSCG00000013837
ENSSSCG00000013838
ENSSSCG00000013855
ENSSSCG00000013859
ENSSSCG00000013861
ENSSSCG00000013862
ENSSSCG00000013863
ENSSSCG00000013879
ENSSSCG00000013891
ENSSSCG00000013904
ENSSSCG00000013906
ENSSSCG00000013908
ENSSSCG00000013913
ENSSSCG00000013930
ENSSSCG00000013978
ENSSSCG00000013983
ENSSSCG00000013984
ENSSSCG00000013991
ENSSSCG00000014033
ENSSSCG00000014035
ENSSSCG00000014036
ENSSSCG00000014038
ENSSSCG00000014043
ENSSSCG00000014044
ENSSSCG00000014045
ENSSSCG00000014058
ENSSSCG00000014061
ENSSSCG00000014068
ENSSSCG00000014071
ENSSSCG00000014075
ENSSSCG00000014094
ENSSSCG00000014098
ENSSSCG00000014112
ENSSSCG00000014116
ENSSSCG00000014119
ENSSSCG00000014121
ENSSSCG00000014126
ENSSSCG00000014129
ENSSSCG00000014132
ENSSSCG00000014135
ENSSSCG00000014148
ENSSSCG00000014168
ENSSSCG00000014190
ENSSSCG00000014194
ENSSSCG00000014197
ENSSSCG00000014199
ENSSSCG00000014203
ENSSSCG00000014211
ENSSSCG00000014217
ENSSSCG00000014218
ENSSSCG00000014220
ENSSSCG00000014223
ENSSSCG00000014235
ENSSSCG00000014239
ENSSSCG00000014264
ENSSSCG00000014269
ENSSSCG00000014288
ENSSSCG00000014292
ENSSSCG00000014295
ENSSSCG00000014296
ENSSSCG00000014298
ENSSSCG00000014306
ENSSSCG00000014307
ENSSSCG00000014325
ENSSSCG00000014327
ENSSSCG00000014331
ENSSSCG00000014337
ENSSSCG00000014342
ENSSSCG00000014364
ENSSSCG00000014365
ENSSSCG00000014367
ENSSSCG00000014376
ENSSSCG00000014388
ENSSSCG00000014396
ENSSSCG00000014397
ENSSSCG00000014409
ENSSSCG00000014416
ENSSSCG00000014427
ENSSSCG00000014440
ENSSSCG00000014539
ENSSSCG00000014557
ENSSSCG00000014558
ENSSSCG00000014568
ENSSSCG00000014577
ENSSSCG00000014579
ENSSSCG00000014598
ENSSSCG00000014623
ENSSSCG00000014768
ENSSSCG00000014791
ENSSSCG00000014799
ENSSSCG00000014800
ENSSSCG00000014804
ENSSSCG00000014811
ENSSSCG00000014830
ENSSSCG00000014831
ENSSSCG00000014835
ENSSSCG00000014841
ENSSSCG00000014842
ENSSSCG00000014850
ENSSSCG00000014865
ENSSSCG00000014868
ENSSSCG00000014873
ENSSSCG00000014882
ENSSSCG00000014884
ENSSSCG00000014889
ENSSSCG00000014900
ENSSSCG00000014914
ENSSSCG00000014915
ENSSSCG00000014949
ENSSSCG00000014955
ENSSSCG00000014961
ENSSSCG00000014989
ENSSSCG00000014999
ENSSSCG00000015011
ENSSSCG00000015023
ENSSSCG00000015031
ENSSSCG00000015044
ENSSSCG00000015050
ENSSSCG00000015074
ENSSSCG00000015077
ENSSSCG00000015095
ENSSSCG00000015107
ENSSSCG00000015110
ENSSSCG00000015112
ENSSSCG00000015117
ENSSSCG00000015145
ENSSSCG00000015195
ENSSSCG00000015201
ENSSSCG00000015213
ENSSSCG00000015242
ENSSSCG00000015261
ENSSSCG00000015262
ENSSSCG00000015288
ENSSSCG00000015305
ENSSSCG00000015306
ENSSSCG00000015313
ENSSSCG00000015315
ENSSSCG00000015325
ENSSSCG00000015343
ENSSSCG00000015360
ENSSSCG00000015372
ENSSSCG00000015378
ENSSSCG00000015393
ENSSSCG00000015414
ENSSSCG00000015424
ENSSSCG00000015427
ENSSSCG00000015428
ENSSSCG00000015430
ENSSSCG00000015432
ENSSSCG00000015441
ENSSSCG00000015446
ENSSSCG00000015473
ENSSSCG00000015486
ENSSSCG00000015492
ENSSSCG00000015504
ENSSSCG00000015509
ENSSSCG00000015524
ENSSSCG00000015530
ENSSSCG00000015534
ENSSSCG00000015552
ENSSSCG00000015553
ENSSSCG00000015558
ENSSSCG00000015564
ENSSSCG00000015576
ENSSSCG00000015583
ENSSSCG00000015587
ENSSSCG00000015592
ENSSSCG00000015599
ENSSSCG00000015601
ENSSSCG00000015611
ENSSSCG00000015613
ENSSSCG00000015614
ENSSSCG00000015637
ENSSSCG00000015659
ENSSSCG00000015667
ENSSSCG00000015668
ENSSSCG00000015669
ENSSSCG00000015683
ENSSSCG00000015689
ENSSSCG00000015690
ENSSSCG00000015692
ENSSSCG00000015694
ENSSSCG00000015695
ENSSSCG00000015712
ENSSSCG00000015714
ENSSSCG00000015718
ENSSSCG00000015721
ENSSSCG00000015729
ENSSSCG00000015730
ENSSSCG00000015734
ENSSSCG00000015737
ENSSSCG00000015753
ENSSSCG00000015755
ENSSSCG00000015756
ENSSSCG00000015757
ENSSSCG00000015769
ENSSSCG00000015777
ENSSSCG00000015779
ENSSSCG00000015793
ENSSSCG00000015794
ENSSSCG00000015798
ENSSSCG00000015817
ENSSSCG00000015826
ENSSSCG00000015827
ENSSSCG00000015836
ENSSSCG00000015842
ENSSSCG00000015845
ENSSSCG00000015847
ENSSSCG00000015851
ENSSSCG00000015853
ENSSSCG00000015859
ENSSSCG00000015860
ENSSSCG00000015862
ENSSSCG00000015934
ENSSSCG00000015936
ENSSSCG00000015943
ENSSSCG00000015948
ENSSSCG00000015951
ENSSSCG00000015958
ENSSSCG00000015963
ENSSSCG00000015964
ENSSSCG00000015965
ENSSSCG00000015972
ENSSSCG00000015988
ENSSSCG00000015996
ENSSSCG00000015997
ENSSSCG00000016004
ENSSSCG00000016005
ENSSSCG00000016017
ENSSSCG00000016020
ENSSSCG00000016026
ENSSSCG00000016036
ENSSSCG00000016041
ENSSSCG00000016043
ENSSSCG00000016044
ENSSSCG00000016071
ENSSSCG00000016079
ENSSSCG00000016087
ENSSSCG00000016088
ENSSSCG00000016091
ENSSSCG00000016097
ENSSSCG00000016098
ENSSSCG00000016116
ENSSSCG00000016134
ENSSSCG00000016170
ENSSSCG00000016177
ENSSSCG00000016191
ENSSSCG00000016193
ENSSSCG00000016202
ENSSSCG00000016207
ENSSSCG00000016208
ENSSSCG00000016211
ENSSSCG00000016226
ENSSSCG00000016232
ENSSSCG00000016234
ENSSSCG00000016243
ENSSSCG00000016248
ENSSSCG00000016266
ENSSSCG00000016275
ENSSSCG00000016289
ENSSSCG00000016300
ENSSSCG00000016317
ENSSSCG00000016323
ENSSSCG00000016336
ENSSSCG00000016339
ENSSSCG00000016340
ENSSSCG00000016344
ENSSSCG00000016345
ENSSSCG00000016346
ENSSSCG00000016349
ENSSSCG00000016367
ENSSSCG00000016369
ENSSSCG00000016372
ENSSSCG00000016374
ENSSSCG00000016376
ENSSSCG00000016380
ENSSSCG00000016395
ENSSSCG00000016399
ENSSSCG00000016405
ENSSSCG00000016407
ENSSSCG00000016432
ENSSSCG00000016434
ENSSSCG00000016438
ENSSSCG00000016488
ENSSSCG00000016494
ENSSSCG00000016510
ENSSSCG00000016518
ENSSSCG00000016528
ENSSSCG00000016529
ENSSSCG00000016531
ENSSSCG00000016543
ENSSSCG00000016549
ENSSSCG00000016553
ENSSSCG00000016563
ENSSSCG00000016565
ENSSSCG00000016572
ENSSSCG00000016590
ENSSSCG00000016619
ENSSSCG00000016653
ENSSSCG00000016677
ENSSSCG00000016680
ENSSSCG00000016682
ENSSSCG00000016711
ENSSSCG00000016734
ENSSSCG00000016744
ENSSSCG00000016745
ENSSSCG00000016750
ENSSSCG00000016753
ENSSSCG00000016760
ENSSSCG00000016762
ENSSSCG00000016768
ENSSSCG00000016769
ENSSSCG00000016772
ENSSSCG00000016773
ENSSSCG00000016775
ENSSSCG00000016776
ENSSSCG00000016783
ENSSSCG00000016808
ENSSSCG00000016809
ENSSSCG00000016817
ENSSSCG00000016826
ENSSSCG00000016827
ENSSSCG00000016834
ENSSSCG00000016835
ENSSSCG00000016845
ENSSSCG00000016869
ENSSSCG00000016876
ENSSSCG00000016881
ENSSSCG00000016884
ENSSSCG00000016920
ENSSSCG00000016934
ENSSSCG00000016937
ENSSSCG00000016938
ENSSSCG00000016944
ENSSSCG00000016948
ENSSSCG00000016949
ENSSSCG00000016960
ENSSSCG00000016961
ENSSSCG00000016962
ENSSSCG00000016969
ENSSSCG00000016970
ENSSSCG00000016985
ENSSSCG00000016989
ENSSSCG00000017015
ENSSSCG00000017049
ENSSSCG00000017058
ENSSSCG00000017065
ENSSSCG00000017069
ENSSSCG00000017089
ENSSSCG00000017091
ENSSSCG00000017094
ENSSSCG00000017099
ENSSSCG00000017100
ENSSSCG00000017102
ENSSSCG00000017106
ENSSSCG00000017108
ENSSSCG00000017128
ENSSSCG00000017133
ENSSSCG00000017136
ENSSSCG00000017140
ENSSSCG00000017155
ENSSSCG00000017165
ENSSSCG00000017167
ENSSSCG00000017184
ENSSSCG00000017190
ENSSSCG00000017201
ENSSSCG00000017203
ENSSSCG00000017208
ENSSSCG00000017209
ENSSSCG00000017211
ENSSSCG00000017212
ENSSSCG00000017213
ENSSSCG00000017227
ENSSSCG00000017246
ENSSSCG00000017260
ENSSSCG00000017273
ENSSSCG00000017275
ENSSSCG00000017287
ENSSSCG00000017288
ENSSSCG00000017289
ENSSSCG00000017294
ENSSSCG00000017301
ENSSSCG00000017303
ENSSSCG00000017310
ENSSSCG00000017335
ENSSSCG00000017336
ENSSSCG00000017339
ENSSSCG00000017352
ENSSSCG00000017354
ENSSSCG00000017360
ENSSSCG00000017378
ENSSSCG00000017385
ENSSSCG00000017386
ENSSSCG00000017388
ENSSSCG00000017391
ENSSSCG00000017407
ENSSSCG00000017418
ENSSSCG00000017419
ENSSSCG00000017422
ENSSSCG00000017429
ENSSSCG00000017476
ENSSSCG00000017477
ENSSSCG00000017496
ENSSSCG00000017499
ENSSSCG00000017502
ENSSSCG00000017506
ENSSSCG00000017523
[truncated: 1,137 more rows]
