# Supplementary material for: Characterization of gene promoters in pig: conservative elements, regulatory motifs and evolutionary trend
Source: PeerJ. 2019 Jun 25;7:e7204. doi: 10.7717/peerj.7204 (PMC6598670; doi:10.7717/peerj.7204)
Supplement: Supplemental Information 8 — Lists of dN, dS, dN/dS and dP in HK coding sequences and promoters. [file peerj-07-7204-s008.xls]

## Sheet: Sheet1
Pig Ensembl Gene ID	Mouse Ensembl Gene ID	dN with Mouse	dS with Mouse	dN/dS	dP
ENSSSCG00000010973	ENSMUSG00000036114	0.0278	0.6552	0.0424298	0.8354
ENSSSCG00000023216	ENSMUSG00000027998	0.0328	0.6938	0.0472759	0.1797
ENSSSCG00000010981	ENSMUSG00000028443	0.0854	0.2973	0.287252	0.13405
ENSSSCG00000029375	ENSMUSG00000062012	0.1395	1.3486	0.103441	0.2138
ENSSSCG00000021761	ENSMUSG00000028437	0.0624	0.2561	0.243655	0.39045
ENSSSCG00000006280	ENSMUSG00000040124	0.2125	0.6477	0.328084	0.13635
ENSSSCG00000016087	ENSMUSG00000048495	0.0563	0.6253	0.0900368	0.36895
ENSSSCG00000006214	ENSMUSG00000061024	0.0467	0.9768	0.0478092	0.5351
ENSSSCG00000030649	ENSMUSG00000028437	0.1575	0.4233	0.372077	0.36915
ENSSSCG00000024598	ENSMUSG00000050697	0.0126	0.6365	0.0197958	0.33085
ENSSSCG00000003791	ENSMUSG00000055436	0.0157	0.5323	0.0294946	0.18185
ENSSSCG00000001156	ENSMUSG00000046351	0.0637	0.6225	0.102329	0.31495
ENSSSCG00000016088	ENSMUSG00000025971	0.1336	0.5846	0.228532	0.3259
ENSSSCG00000025372	ENSMUSG00000028085	0.1966	0.551	0.356806	0.4721
ENSSSCG00000029432	ENSMUSG00000028085	0.1478	1.3594	0.108724	0.4275
ENSSSCG00000027958	ENSMUSG00000036376	0.1284	0.8681	0.147909	0.16245
ENSSSCG00000009449	ENSMUSG00000022019	0.0815	0.5889	0.138394	0.37595
ENSSSCG00000002290	ENSMUSG00000021118	0.0315	0.5372	0.0586374	0.3001
ENSSSCG00000003792	ENSMUSG00000063052	0.1029	0.6175	0.16664	0.41165
ENSSSCG00000011518	ENSMUSG00000035378	0.1795	0.6519	0.275349	0.50545
ENSSSCG00000010094	ENSMUSG00000022765	0.123	1.4232	0.086425	0.1346
ENSSSCG00000023315	ENSMUSG00000041319	0.0268	0.8878	0.030187	0.7707
ENSSSCG00000010095	ENSMUSG00000006134	0.0189	0.5906	0.0320014	0.5142
ENSSSCG00000016407	ENSMUSG00000042050	0.1712	1.4531	0.117817	0.19775
ENSSSCG00000016091	ENSMUSG00000054770	0.1054	0.6072	0.173584	0.409
ENSSSCG00000016590	ENSMUSG00000001424	0.0123	0.5458	0.0225357	0.1852
ENSSSCG00000016405	ENSMUSG00000042029	0.1508	0.7907	0.190717	0.54615
ENSSSCG00000016869	ENSMUSG00000031922	0.0932	0.6696	0.139188	0.428
ENSSSCG00000012741	ENSMUSG00000059401	0.1741	0.7851	0.221755	0.56665
ENSSSCG00000028200	ENSMUSG00000029708	0.0369	0.8578	0.043017	0.3658
ENSSSCG00000002822	ENSMUSG00000031751	0.0764	0.7623	0.100223	0.15755
ENSSSCG00000002905	ENSMUSG00000036733	0.0162	0.4605	0.0351792	0.1445
ENSSSCG00000024410	ENSMUSG00000052144	0.1394	0.6085	0.229088	0.44365
ENSSSCG00000008821	ENSMUSG00000036087	0.038	0.3815	0.0996068	0.12875
ENSSSCG00000020782	ENSMUSG00000074634	0.1586	0.5474	0.289733	0.4323
ENSSSCG00000009029	ENSMUSG00000037148	0.1553	0.8784	0.176799	0.5945
ENSSSCG00000009030	ENSMUSG00000037134	0.0811	0.5739	0.141314	0.36805
ENSSSCG00000030044	ENSMUSG00000031617	0.11	1.2076	0.0910898	0.5138
ENSSSCG00000022827	ENSMUSG00000042207	0.1184	0.6942	0.170556	0.4655
ENSSSCG00000006285	ENSMUSG00000041396	0.2009	0.6012	0.334165	0.8015
ENSSSCG00000024162	ENSMUSG00000024525	0.0651	1.1796	0.0551882	0.1549
ENSSSCG00000010167	ENSMUSG00000050930	0.3681	0.8894	0.413875	0.4128
ENSSSCG00000009035	ENSMUSG00000031684	0.0344	0.6589	0.0522082	0.36385
ENSSSCG00000016876	ENSMUSG00000062822	0.1964	0.6702	0.293047	0.5315
ENSSSCG00000010169	ENSMUSG00000001995	0.0533	1.1501	0.0463438	0.52835
ENSSSCG00000002906	ENSMUSG00000006311	0.3023	1.3032	0.231967	0.7539
ENSSSCG00000017824	ENSMUSG00000078789	0.0896	0.5279	0.169729	0.35355
ENSSSCG00000010931	ENSMUSG00000026455	0.0042	0.6399	0.00656353	0.32415
ENSSSCG00000009043	ENSMUSG00000058355	0.0038	0.3832	0.00991649	0.1954
ENSSSCG00000015050	ENSMUSG00000032264	0.1046	0.626	0.167093	0.4176
ENSSSCG00000010993	ENSMUSG00000028423	0.0784	0.5674	0.138174	0.3621
ENSSSCG00000011411	ENSMUSG00000010045	0.0316	0.6712	0.0470799	0.3672
ENSSSCG00000008030	ENSMUSG00000015126	0.1433	0.6842	0.209442	0.4854
ENSSSCG00000002051	ENSMUSG00000040997	0.0132	0.4862	0.0271493	0.1563
ENSSSCG00000008061	ENSMUSG00000055839	0.0146	0.9453	0.0154448	0.48725
ENSSSCG00000010098	ENSMUSG00000022760	0.0321	0.5374	0.059732	0.3008
ENSSSCG00000010930	ENSMUSG00000026457	0.0259	0.5241	0.049418	0.18795
ENSSSCG00000022947	ENSMUSG00000024527	0.0307	1.0206	0.0300803	0.541
ENSSSCG00000029050	ENSMUSG00000036860	0.2068	1.2089	0.171065	0.41125
ENSSSCG00000010996	ENSMUSG00000028416	0.1585	0.464	0.341595	0.3905
ENSSSCG00000024722	ENSMUSG00000022064	0.1042	0.7838	0.132942	0.4961
ENSSSCG00000028078	ENSMUSG00000038268	0.0827	0.7581	0.109089	0.46175
ENSSSCG00000009044	ENSMUSG00000036977	0.0025	0.4051	0.00617132	0.10505
ENSSSCG00000008836	ENSMUSG00000062110	0.117	0.6018	0.194417	0.4179
ENSSSCG00000008031	ENSMUSG00000035521	0.137	0.9523	0.143862	0.21315
ENSSSCG00000009047	ENSMUSG00000031715	0.0104	0.5114	0.0203363	0.4661
ENSSSCG00000017826	ENSMUSG00000038290	0.0098	0.3068	0.0319426	0.1632
ENSSSCG00000025298	ENSMUSG00000020561	0.1391	0.7667	0.181427	0.22245
ENSSSCG00000006220	ENSMUSG00000027599	0.0049	0.5675	0.00863436	0.38865
ENSSSCG00000011415	ENSMUSG00000032577	0.0307	0.6195	0.0495561	0.34045
ENSSSCG00000015372	ENSMUSG00000020561	0.1391	0.7667	0.181427	0.52245
ENSSSCG00000016881	ENSMUSG00000034566	0.1576	0.7574	0.20808	0.5363
ENSSSCG00000030519	ENSMUSG00000009575	0.0096	0.4682	0.0205041	0.1437
ENSSSCG00000008693	ENSMUSG00000036693	0.1578	1.1	0.143455	0.5078
ENSSSCG00000023998	ENSMUSG00000039684	0.0456	0.5672	0.0803949	0.3292
ENSSSCG00000014094	ENSMUSG00000021681	0.121	0.9632	0.125623	0.5026
ENSSSCG00000009460	ENSMUSG00000033166	0.0528	0.7098	0.0743872	0.4077
ENSSSCG00000016434	ENSMUSG00000028945	0.05	0.7072	0.0707014	0.4036
ENSSSCG00000000266	ENSMUSG00000001289	0.006	0.3918	0.0153139	0.1019
ENSSSCG00000009531	ENSMUSG00000026049	0.0115	0.3007	0.0382441	0.16185
ENSSSCG00000009532	ENSMUSG00000026047	0.1077	0.7217	0.149231	0.46855
ENSSSCG00000010108	ENSMUSG00000022750	0.0312	1.0132	0.0307935	0.5378
ENSSSCG00000027572	ENSMUSG00000079415	0.1081	0.4793	0.225537	0.34775
ENSSSCG00000007970	ENSMUSG00000038628	0	0	0	0
ENSSSCG00000030255	ENSMUSG00000045983	0.0511	0.3988	0.128134	0.1505
ENSSSCG00000022155	ENSMUSG00000039191	0.0139	0.5151	0.0269851	0.17145
ENSSSCG00000030273	ENSMUSG00000030264	0.1797	0.817	0.219951	0.5882
ENSSSCG00000002081	ENSMUSG00000095689	0.3722	0.7782	0.478283	0.5613
ENSSSCG00000010416	ENSMUSG00000059689	0.0223	0.6531	0.0341448	0.34885
ENSSSCG00000029824	ENSMUSG00000003923	0.249	1.4254	0.174688	0.7617
ENSSSCG00000026706	ENSMUSG00000041958	0.0401	0.8149	0.0492085	0.44755
ENSSSCG00000011540	ENSMUSG00000034269	0.0606	0.3755	0.161385	0.14835
ENSSSCG00000016518	ENSMUSG00000029833	0.0367	0.5242	0.0700114	0.1988
ENSSSCG00000013066	ENSMUSG00000024660	0.1442	1.2358	0.116686	0.5621
ENSSSCG00000015378	ENSMUSG00000025323	0.0181	0.2159	0.0838351	0.12605
ENSSSCG00000024381	ENSMUSG00000001376	0.0499	0.5019	0.0994222	0.30085
ENSSSCG00000028708	ENSMUSG00000001376	0.0716	0.4803	0.149073	0.31175
ENSSSCG00000010103	ENSMUSG00000067338	0	0	0	0
ENSSSCG00000007962	ENSMUSG00000040767	0.0149	0.9124	0.0163306	0.4711
ENSSSCG00000009533	ENSMUSG00000026048	0.1207	0.9683	0.124651	0.40485
ENSSSCG00000027246	ENSMUSG00000014294	0.1451	0.799	0.181602	0.1146
ENSSSCG00000002896	ENSMUSG00000078765	0.0145	0.5236	0.0276929	0.1763
ENSSSCG00000000290	ENSMUSG00000060992	0	0	0	0
ENSSSCG00000014396	ENSMUSG00000024442	0.1743	0.6277	0.27768	0.35815
ENSSSCG00000005679	ENSMUSG00000039483	0.0441	1.4728	0.029943	0.4805
ENSSSCG00000011529	ENSMUSG00000013736	0.0427	0.6597	0.0647264	0.37255
ENSSSCG00000022963	ENSMUSG00000015127	0.1112	1.1728	0.0948158	0.1976
ENSSSCG00000011772	ENSMUSG00000037400	0.0409	0.4075	0.100368	0.14465
ENSSSCG00000014116	ENSMUSG00000021704	0.0514	0.5274	0.0974592	0.3151
ENSSSCG00000010648	ENSMUSG00000035173	0.0867	0.8316	0.104257	0.3825
ENSSSCG00000005683	ENSMUSG00000026848	0.0805	0.8634	0.093236	0.3122
ENSSSCG00000002307	ENSMUSG00000021131	0	0	0	0
ENSSSCG00000009534	ENSMUSG00000041684	0.0719	0.589	0.122071	0.1664
ENSSSCG00000022078	ENSMUSG00000022064	0.0749	0.6976	0.107368	0.3237
ENSSSCG00000025964	ENSMUSG00000026849	0.0463	0.8441	0.0548513	0.40835
ENSSSCG00000026915	ENSMUSG00000022914	0.0952	0.9418	0.101083	0.1661
ENSSSCG00000028806	ENSMUSG00000024952	0.018	1.1022	0.016331	0.5691
ENSSSCG00000030426	ENSMUSG00000026851	0.0151	1.1147	0.0135462	0.57245
ENSSSCG00000000267	ENSMUSG00000001285	0.0881	0.5985	0.147201	0.38735
ENSSSCG00000028428	ENSMUSG00000022914	0.0122	0.4673	0.0261074	0.14585
ENSSSCG00000024828	ENSMUSG00000037400	0.1076	0.8976	0.119875	0.5564
ENSSSCG00000016619	ENSMUSG00000029670	0.0185	0.7417	0.0249427	0.18935
ENSSSCG00000011420	ENSMUSG00000074102	0.0322	0.7193	0.0447657	0.19185
ENSSSCG00000024341	ENSMUSG00000026854	0.0368	1.0468	0.0351548	0.3602
ENSSSCG00000016528	ENSMUSG00000038784	0.082	0.2972	0.275908	0.1306
ENSSSCG00000008697	ENSMUSG00000029104	0.0741	0.9648	0.0768035	0.3565
ENSSSCG00000014098	ENSMUSG00000042015	0.1012	0.7438	0.136058	0.1731
ENSSSCG00000001024	ENSMUSG00000021428	0.1431	1.1283	0.126828	0.40725
ENSSSCG00000016884	ENSMUSG00000042275	0.0103	0.6425	0.0160311	0.33155
ENSSSCG00000016432	ENSMUSG00000028944	0.0356	0.5157	0.0690324	0.19345
ENSSSCG00000000359	ENSMUSG00000090247	0.0034	0.4445	0.00764904	0.12565
ENSSSCG00000024405	ENSMUSG00000067722	0.3207	0.8926	0.359287	0.167
ENSSSCG00000010175	ENSMUSG00000031985	0.17	0.7989	0.212793	0.56945
ENSSSCG00000008678	ENSMUSG00000019295	0.0581	1.4525	0.04	0.38435
ENSSSCG00000027524	ENSMUSG00000041958	0.0352	0.6889	0.051096	0.17965
ENSSSCG00000026002	ENSMUSG00000033114	0.1015	0.4008	0.253244	0.3019
ENSSSCG00000015074	ENSMUSG00000034908	0.023	0.6989	0.0329089	0.17245
ENSSSCG00000017260	ENSMUSG00000041895	0.0258	0.7574	0.0340639	0.4045
ENSSSCG00000021652	ENSMUSG00000044155	0	0	0	0
ENSSSCG00000000268	ENSMUSG00000036678	0.0395	0.6007	0.0657566	0.33985
ENSSSCG00000016531	ENSMUSG00000046806	0.2654	0.8423	0.31509	0.38655
ENSSSCG00000016438	ENSMUSG00000028954	0.0792	0.98	0.0808163	0.1692
ENSSSCG00000016529	ENSMUSG00000038836	0.0869	0.4852	0.179101	0.3295
ENSSSCG00000029166	ENSMUSG00000026036	0.1794	0.6995	0.256469	0.16915
ENSSSCG00000010185	ENSMUSG00000089704	0.0211	1.1153	0.0189187	0.43875
ENSSSCG00000002295	ENSMUSG00000021124	0.0497	0.4926	0.100893	0.196
ENSSSCG00000010935	ENSMUSG00000033114	0.0917	0.5655	0.162157	0.37445
ENSSSCG00000009466	ENSMUSG00000022111	0.02	0.5191	0.0385282	0.17955
ENSSSCG00000005704	ENSMUSG00000039356	0.0301	0.7237	0.0415918	0.39195
ENSSSCG00000005706	ENSMUSG00000026842	0.0633	0.9445	0.0670196	0.13555
ENSSSCG00000008675	ENSMUSG00000005299	0.1005	1.4908	0.0674135	0.3459
ENSSSCG00000008772	ENSMUSG00000047881	0.1327	0.9418	0.1409	0.4036
ENSSSCG00000020711	ENSMUSG00000027739	0.0302	0.6302	0.0479213	0.3453
ENSSSCG00000010176	ENSMUSG00000031984	0.2575	0.7276	0.353903	0.5213
ENSSSCG00000015988	ENSMUSG00000092086	0.0065	0.3269	0.0198838	0.16995
ENSSSCG00000014298	ENSMUSG00000020349	0.0036	0.4453	0.00808444	0.12625
ENSSSCG00000002629	ENSMUSG00000001366	0.0499	0.5464	0.091325	0.3231
ENSSSCG00000006110	ENSMUSG00000052137	0.1267	0.5266	0.2406	0.39
ENSSSCG00000010999	ENSMUSG00000028409	0	0	0	0
ENSSSCG00000020945	ENSMUSG00000022452	0.1223	0.5233	0.233709	0.38395
ENSSSCG00000015325	ENSMUSG00000032757	0.0383	0.2809	0.136347	0.17875
ENSSSCG00000005711	ENSMUSG00000001855	0.1536	0.742	0.207008	0.5246
ENSSSCG00000009061	ENSMUSG00000063273	0.0057	0.3603	0.0158201	0.18585
ENSSSCG00000007168	ENSMUSG00000037773	0.0862	0.4889	0.176314	0.33065
ENSSSCG00000000045	ENSMUSG00000022450	0.072	0.5725	0.125764	0.35825
ENSSSCG00000007170	ENSMUSG00000027408	0.0704	0.582	0.120962	0.3614
ENSSSCG00000010833	ENSMUSG00000072258	0.1381	0.9755	0.141568	0.42585
ENSSSCG00000009075	ENSMUSG00000025759	0.1003	0.4962	0.202136	0.3484
ENSSSCG00000011531	ENSMUSG00000034639	0.1504	0.7229	0.208051	0.53185
ENSSSCG00000010186	ENSMUSG00000031976	0.2376	0.9391	0.253008	0.34715
ENSSSCG00000002455	ENSMUSG00000021192	0.0955	0.8553	0.111657	0.402315
ENSSSCG00000011551	ENSMUSG00000048930	0.0073	0.5644	0.0129341	0.1895
ENSSSCG00000021973	ENSMUSG00000021760	0.0958	0.6059	0.158112	0.39875
ENSSSCG00000016543	ENSMUSG00000029763	0.0196	0.6456	0.0303594	0.3424
ENSSSCG00000022396	ENSMUSG00000026577	0.1208	0.7136	0.169283	0.4776
ENSSSCG00000029203	ENSMUSG00000016831	0.0287	0.3767	0.0761879	0.11705
ENSSSCG00000023761	ENSMUSG00000066037	0.006	0.1142	0.0525394	0.0631
ENSSSCG00000008681	ENSMUSG00000029111	0.033	2.1209	0.0155594	0.5345
ENSSSCG00000000364	ENSMUSG00000051255	0.0518	0.6844	0.0756867	0.394
ENSSSCG00000009541	ENSMUSG00000040396	0.0173	0.7939	0.0217912	0.41425
ENSSSCG00000008947	ENSMUSG00000035505	0.1599	0.7261	0.220218	0.35295
ENSSSCG00000022659	ENSMUSG00000047126	0.0018	0.4558	0.0039491	0.1297
ENSSSCG00000006294	ENSMUSG00000026575	0.0654	0.692	0.0945087	0.4114
ENSSSCG00000011708	ENSMUSG00000027806	0.1552	0.4669	0.332405	0.38865
ENSSSCG00000007981	ENSMUSG00000020289	0.036	1.0722	0.0335758	0.5721
ENSSSCG00000014397	ENSMUSG00000024427	0.041	1.7586	0.023314	0.52203
ENSSSCG00000028113	ENSMUSG00000015733	0.0047	0.2506	0.018755	0.13
ENSSSCG00000007178	ENSMUSG00000027404	0.1994	1.0592	0.188255	0.129
ENSSSCG00000017764	ENSMUSG00000010277	0.04	0.4449	0.0899078	0.16245
ENSSSCG00000011001	ENSMUSG00000028411	0.0962	0.4223	0.2278	0.30735
ENSSSCG00000005720	ENSMUSG00000026799	0.0043	0.9735	0.00441705	0.4105
ENSSSCG00000017140	ENSMUSG00000025371	0.0512	1.6117	0.0317677	0.38705
ENSSSCG00000022687	ENSMUSG00000024764	0.0146	0.9597	0.0152131	0.37445
ENSSSCG00000000037	ENSMUSG00000054277	0.1212	0.9958	0.121711	0.4091
ENSSSCG00000017665	ENSMUSG00000018425	0.0099	0.4068	0.0243363	0.1133
ENSSSCG00000009069	ENSMUSG00000025766	0.0892	0.532	0.167669	0.3552
ENSSSCG00000022419	ENSMUSG00000032244	0.0045	0.5129	0.00877364	0.16095
ENSSSCG00000005725	ENSMUSG00000026803	3.5029	3.418	1.02484	2.2119
ENSSSCG00000026196	ENSMUSG00000037709	0.0869	0.8411	0.103317	0.40745
ENSSSCG00000014119	ENSMUSG00000021703	0.1192	0.8105	0.14707	0.32445
ENSSSCG00000002746	ENSMUSG00000031730	0.0707	0.5142	0.137495	0.3278
ENSSSCG00000008685	ENSMUSG00000079555	0.3615	0.8859	0.40806	0.40445
ENSSSCG00000005729	ENSMUSG00000026806	0.1599	0.6661	0.240054	0.49295
ENSSSCG00000009071	ENSMUSG00000025764	0.0414	0.4693	0.0882165	0.17605
ENSSSCG00000011710	ENSMUSG00000027810	0.0631	0.4682	0.134771	0.1972
ENSSSCG00000008866	ENSMUSG00000033910	0.0669	1.0596	0.063137	0.5967
ENSSSCG00000005731	ENSMUSG00000035666	0.0393	0.8862	0.0443466	0.4824
ENSSSCG00000005252	ENSMUSG00000074925	0.0799	0.383	0.208616	0.1714
ENSSSCG00000023474	ENSMUSG00000026812	0.0449	2.0181	0.0222486	1.05395
ENSSSCG00000010188	ENSMUSG00000031974	0.1508	1.0233	0.147366	0.36245
ENSSSCG00000000927	ENSMUSG00000036676	0.0304	0.6477	0.0469353	0.35425
ENSSSCG00000001701	ENSMUSG00000023944	0.0024	0.9681	0.00247908	0.48645
ENSSSCG00000004546	ENSMUSG00000026021	0.0184	0.1952	0.0942623	0.116
ENSSSCG00000002748	ENSMUSG00000037993	0.0034	0.6888	0.00493612	0.3478
ENSSSCG00000011549	ENSMUSG00000030271	0.1135	0.5846	0.19415	0.4058
ENSSSCG00000021646	ENSMUSG00000033863	0.0107	0.2828	0.0378359	0.1521
ENSSSCG00000004088	ENSMUSG00000061759	0.0909	0.9457	0.0961193	0.56375
ENSSSCG00000024886	ENSMUSG00000015733	0.0045	0.2545	0.0176817	0.13175
ENSSSCG00000005255	ENSMUSG00000024943	0.0421	0.8234	0.0511295	0.4538
ENSSSCG00000026389	ENSMUSG00000090935	0.1856	0.4374	0.424326	0.4043
ENSSSCG00000009074	ENSMUSG00000037818	0.0423	0.4921	0.0859581	0.18835
ENSSSCG00000005739	ENSMUSG00000026816	0.1207	1.3941	0.0865792	0.51775
ENSSSCG00000016549	ENSMUSG00000025609	0.003	0.3041	0.00986518	0.15505
ENSSSCG00000002458	ENSMUSG00000046675	0.0315	0.3267	0.0964187	0.19485
ENSSSCG00000011788	ENSMUSG00000033653	0.0258	0.7471	0.0345335	0.39935
ENSSSCG00000005733	ENSMUSG00000026812	0.0889	0.7283	0.122065	0.45305
ENSSSCG00000021272	ENSMUSG00000033653	0.0347	0.5932	0.0584963	0.3313
ENSSSCG00000011534	ENSMUSG00000030103	0.0455	0.5147	0.088401	0.30285
ENSSSCG00000021802	ENSMUSG00000047368	0.0016	0.4403	0.00363389	0.12175
ENSSSCG00000027538	ENSMUSG00000036372	0	0	0	0
ENSSSCG00000002459	ENSMUSG00000098530	0.3181	0.9311	0.341639	0.58365
ENSSSCG00000011548	ENSMUSG00000001632	0.0138	0.4031	0.0342347	0.11535
ENSSSCG00000023793	ENSMUSG00000048439	0.1839	0.7139	0.257599	0.54085
ENSSSCG00000006727	ENSMUSG00000033285	0.0552	0.5915	0.0933221	0.35095
ENSSSCG00000027718	ENSMUSG00000079555	0.1301	0.5032	0.258545	0.3817
ENSSSCG00000016553	ENSMUSG00000025607	0.0192	0.4462	0.04303	0.1423
ENSSSCG00000009084	ENSMUSG00000027722	0.0836	0.4776	0.175042	0.3224
ENSSSCG00000023173	ENSMUSG00000052406	0.362	2.3329	0.155172	1.52845
ENSSSCG00000015473	ENSMUSG00000042305	0.0406	0.3516	0.115472	0.1164
ENSSSCG00000029745	ENSMUSG00000037210	0.0956	0.9662	0.0989443	0.5787
ENSSSCG00000007188	ENSMUSG00000032966	0.0222	0.2734	0.0811997	0.1589
ENSSSCG00000002460	ENSMUSG00000041712	0.0825	0.4978	0.165729	0.3314
ENSSSCG00000024897	ENSMUSG00000028986	0.0363	0.5095	0.0712463	0.19105
ENSSSCG00000008788	ENSMUSG00000029191	0.1007	0.6461	0.155858	0.42375
ENSSSCG00000016744	ENSMUSG00000004394	0.0583	1.0808	0.0539415	0.5987
ENSSSCG00000030343	ENSMUSG00000047789	0.0566	0.4137	0.136814	0.16345
ENSSSCG00000000925	ENSMUSG00000046567	0.0995	0.6409	0.15525	0.41995
ENSSSCG00000021475	ENSMUSG00000028962	0.13	1.1058	0.117562	0.5829
ENSSSCG00000025968	ENSMUSG00000022750	0.0277	1.0874	0.0254736	0.5714
ENSSSCG00000007187	ENSMUSG00000027455	0.0125	0.3621	0.0345209	0.19355
ENSSSCG00000021113	ENSMUSG00000015488	0.0392	1.3286	0.0295047	0.5035
ENSSSCG00000028445	ENSMUSG00000045268	0.128	1.1093	0.115388	0.58265
ENSSSCG00000021725	ENSMUSG00000034021	0.0558	0.9929	0.056199	0.55225
ENSSSCG00000025599	ENSMUSG00000031171	0.0872	0.8308	0.104959	0.5026
ENSSSCG00000010111	ENSMUSG00000092470	0.0965	0.9079	0.106289	0.55045
ENSSSCG00000016345	ENSMUSG00000067150	0.127	0.5767	0.220218	0.41535
ENSSSCG00000029620	ENSMUSG00000039201	0.0267	1.0204	0.0261662	0.5369
ENSSSCG00000015077	ENSMUSG00000042790	0.0565	0.3614	0.156336	0.1372
ENSSSCG00000008691	ENSMUSG00000059866	0.1632	1.1513	0.141753	0.53885
ENSSSCG00000001030	ENSMUSG00000001707	0.0767	0.6842	0.112102	0.4188
ENSSSCG00000025624	ENSMUSG00000025583	0	0	0	0
ENSSSCG00000008508	ENSMUSG00000002017	0.0246	0.3256	0.0755528	0.1874
ENSSSCG00000016809	ENSMUSG00000022191	0.0206	0.6143	0.0335341	0.32775
ENSSSCG00000022182	ENSMUSG00000031372	0.0657	1.5975	0.0411268	0.46445
ENSSSCG00000023920	ENSMUSG00000028641	0.0476	0.7715	0.061698	0.43335
ENSSSCG00000012767	ENSMUSG00000031371	0.2298	1.229	0.186981	0.4443
ENSSSCG00000020887	ENSMUSG00000032869	0.0788	0.3569	0.22079	0.15725
ENSSSCG00000024960	ENSMUSG00000028019	0.0733	0.8723	0.0840307	0.50945
ENSSSCG00000021150	ENSMUSG00000025583	0.0449	0.7573	0.0592896	0.42355
ENSSSCG00000028685	ENSMUSG00000039850	0.1695	0.868	0.195276	0.5035
ENSSSCG00000010465	ENSMUSG00000024811	0.0137	0.4592	0.0298345	0.1433
ENSSSCG00000000047	ENSMUSG00000022450	0.0587	0.5627	0.104318	0.34005
ENSSSCG00000027746	ENSMUSG00000055302	0.0768	4.0966	0.0187473	2.1251
ENSSSCG00000030673	ENSMUSG00000060708	0.1405	3.9734	0.0353601	2.1272
ENSSSCG00000002127	ENSMUSG00000053754	0.0181	0.379	0.0477573	0.1076
ENSSSCG00000008713	ENSMUSG00000029190	0.0918	0.5558	0.165167	0.3697
ENSSSCG00000025930	ENSMUSG00000018377	0.0166	0.2323	0.0714593	0.13275
ENSSSCG00000029648	ENSMUSG00000043153	0.2279	1.0821	0.210609	0.56895
ENSSSCG00000011779	ENSMUSG00000033918	0.0787	0.514	0.153113	0.3357
ENSSSCG00000025875	ENSMUSG00000032869	0.0788	0.3569	0.22079	0.15725
ENSSSCG00000009801	ENSMUSG00000029438	0.0589	0.6908	0.0852635	0.4043
ENSSSCG00000017273	ENSMUSG00000020720	0.0102	0.6622	0.0154032	0.3413
ENSSSCG00000020668	ENSMUSG00000031959	0.0178	0.6467	0.0275244	0.34115
ENSSSCG00000026619	ENSMUSG00000038982	0.1715	0.8226	0.208485	0.5828
ENSSSCG00000010802	ENSMUSG00000018189	0.0185	0.6981	0.0265005	0.36755
ENSSSCG00000011535	ENSMUSG00000030105	0	0	0	0
ENSSSCG00000029174	ENSMUSG00000050786	0.0751	1.1794	0.0636764	0.5648
ENSSSCG00000014121	ENSMUSG00000021706	0.2063	0.6512	0.3168	0.5319
ENSSSCG00000029624	ENSMUSG00000029196	0.0157	2.8407	0.00552681	1.43605
ENSSSCG00000024411	ENSMUSG00000020495	0.0232	0.5356	0.0433159	0.191
ENSSSCG00000006892	ENSMUSG00000039756	0.2774	0.7717	0.359466	0.56325
ENSSSCG00000025640	ENSMUSG00000047044	0.271	0.636	0.426101	0.589
ENSSSCG00000004556	ENSMUSG00000032382	0.0242	0.4593	0.0526889	0.15385
ENSSSCG00000005271	ENSMUSG00000024726	0.0431	0.377	0.114324	0.1316
ENSSSCG00000006084	ENSMUSG00000022255	0.0451	0.2576	0.175078	0.1739
ENSSSCG00000014306	ENSMUSG00000021501	0.1065	0.6992	0.152317	0.4561
ENSSSCG00000009211	ENSMUSG00000043162	0.1783	0.5953	0.299513	0.47595
ENSSSCG00000002328	ENSMUSG00000002679	0.0315	0.3018	0.104374	0.1824
ENSSSCG00000008900	ENSMUSG00000036323	0.0151	0.598	0.0252508	0.3141
ENSSSCG00000016808	ENSMUSG00000022195	0.1523	0.7905	0.192663	0.54755
ENSSSCG00000026177	ENSMUSG00000054099	0.1059	0.4579	0.231273	0.33485
ENSSSCG00000005749	ENSMUSG00000026918	0.024	1.3399	0.0179118	0.59395
ENSSSCG00000027931	ENSMUSG00000020328	0.0029	0.58	0.005	0.1929
ENSSSCG00000029385	ENSMUSG00000029199	0.0503	0.5738	0.0876612	0.3372
ENSSSCG00000007935	ENSMUSG00000022543	0.4372	1.0919	0.400403	0.78315
ENSSSCG00000014949	ENSMUSG00000031935	0.0143	0.7113	0.020104	0.36995
ENSSSCG00000005276	ENSMUSG00000024712	0.0212	0.4836	0.0438379	0.163
ENSSSCG00000024912	ENSMUSG00000026917	0.004	1.2924	0.00309502	0.5502
ENSSSCG00000000202	ENSMUSG00000037570	0.0191	0.5925	0.0322363	0.31535
ENSSSCG00000025218	ENSMUSG00000031723	0.1535	1.2709	0.120781	0.58895
ENSSSCG00000029215	ENSMUSG00000016510	0.2761	1.0579	0.260989	0.40505
ENSSSCG00000016745	ENSMUSG00000004393	0.0699	0.8595	0.0813264	0.49965
ENSSSCG00000000942	ENSMUSG00000019897	0.1525	0.9113	0.167343	0.50815
ENSSSCG00000000941	ENSMUSG00000036009	0.2151	0.6711	0.320519	0.55065
ENSSSCG00000020962	ENSMUSG00000020483	0	0	0	0
ENSSSCG00000006490	ENSMUSG00000001415	0.0468	0.5708	0.0819902	0.3322
ENSSSCG00000025451	ENSMUSG00000018433	0.0928	0.5402	0.171788	0.3629
ENSSSCG00000005282	ENSMUSG00000046230	0.106	0.599	0.176962	0.4055
ENSSSCG00000017275	ENSMUSG00000018433	0.1511	0.6024	0.25083	0.4523
ENSSSCG00000000524	ENSMUSG00000020189	0.053	0.5363	0.0988253	0.32115
ENSSSCG00000006120	ENSMUSG00000040550	0.0684	0.5948	0.114997	0.3658
ENSSSCG00000011794	ENSMUSG00000022855	0.0956	0.504	0.189683	0.3476
ENSSSCG00000000523	ENSMUSG00000035759	0.2114	0.5413	0.390541	0.48205
ENSSSCG00000007203	ENSMUSG00000101523	0.006	0.2091	0.0286944	0.11055
ENSSSCG00000009305	ENSMUSG00000016503	0.1346	1.1236	0.119794	0.5964
ENSSSCG00000001706	ENSMUSG00000023938	0.095	0.7232	0.131361	0.4566
ENSSSCG00000000205	ENSMUSG00000078907	0.3981	1.2671	0.314182	1.03165
ENSSSCG00000026106	ENSMUSG00000021497	0.1411	0.9834	0.143482	0.5328
ENSSSCG00000027503	ENSMUSG00000020189	0.0162	0.5466	0.0296378	0.1895
ENSSSCG00000010433	ENSMUSG00000040451	0.0268	0.3297	0.081286	0.19165
ENSSSCG00000000039	ENSMUSG00000041815	0.0592	0.5739	0.103154	0.34615
ENSSSCG00000008790	ENSMUSG00000029191	0.2118	0.8962	0.236331	0.5599
ENSSSCG00000025039	ENSMUSG00000029203	0	0	0	0
ENSSSCG00000024783	ENSMUSG00000033396	0.1306	0.5883	0.221996	0.42475
ENSSSCG00000009090	ENSMUSG00000037270	0.0174	0.5146	0.0338127	0.1747
ENSSSCG00000017649	ENSMUSG00000020492	0.1394	0.4263	0.327	0.35255
ENSSSCG00000015360	ENSMUSG00000036188	0.1003	0.8958	0.111967	0.5482
ENSSSCG00000004561	ENSMUSG00000038664	0.0127	0.3546	0.035815	0.19
ENSSSCG00000023996	ENSMUSG00000060227	0.2229	0.7629	0.292175	0.50435
ENSSSCG00000028089	ENSMUSG00000033396	0.0624	0.4395	0.14198	0.18215
ENSSSCG00000004691	ENSMUSG00000043424	0.0197	0.3261	0.0604109	0.18275
ENSSSCG00000009414	ENSMUSG00000022000	0.0748	0.8243	0.0907437	0.48695
ENSSSCG00000014307	ENSMUSG00000015937	0.0072	0.6682	0.0107752	0.3413
ENSSSCG00000023391	ENSMUSG00000047866	0.0706	0.7871	0.0896964	0.46415
ENSSSCG00000002843	ENSMUSG00000047866	0.0321	0.5198	0.0617545	0.192
ENSSSCG00000027278	ENSMUSG00000022722	0.0099	0.5387	0.0183776	0.17925
ENSSSCG00000016344	ENSMUSG00000023967	0.1282	0.7059	0.181612	0.48115
ENSSSCG00000014112	ENSMUSG00000021690	0.1742	0.7826	0.222591	0.5655
ENSSSCG00000027131	ENSMUSG00000029775	0.0232	0.4681	0.0495621	0.15725
ENSSSCG00000004307	ENSMUSG00000028291	0.0347	0.2975	0.116639	0.18345
ENSSSCG00000028492	ENSMUSG00000027811	0.0955	0.5808	0.164428	0.3859
ENSSSCG00000010183	ENSMUSG00000031979	0.0994	0.7889	0.125998	0.49385
ENSSSCG00000011555	ENSMUSG00000051169	0.2017	0.648	0.311265	0.5257
ENSSSCG00000027774	ENSMUSG00000062861	0.1897	0.9827	0.19304	0.58105
ENSSSCG00000006194	ENSMUSG00000005886	0.0393	0.4925	0.079797	0.18555
ENSSSCG00000015524	ENSMUSG00000033557	0.0128	0.4644	0.0275624	0.145
ENSSSCG00000008878	ENSMUSG00000027804	0.0453	0.5884	0.0769884	0.3395
ENSSSCG00000012084	ENSMUSG00000014039	0.0566	1.5929	0.0355327	0.45305
ENSSSCG00000027432	ENSMUSG00000050312	0.0967	0.5046	0.191637	0.349
ENSSSCG00000010310	ENSMUSG00000039308	0.0176	0.3617	0.0486591	0.19845
ENSSSCG00000027259	ENSMUSG00000007646	0.0958	0.6112	0.156741	0.4014
ENSSSCG00000002753	ENSMUSG00000003848	0.0707	0.6669	0.106013	0.40415
ENSSSCG00000004693	ENSMUSG00000060227	0.0844	0.4858	0.173734	0.3273
ENSSSCG00000030683	ENSMUSG00000022911	0.1053	0.6743	0.156162	0.44245
ENSSSCG00000029023	ENSMUSG00000017418	0	0	0	0
ENSSSCG00000004563	ENSMUSG00000032376	0.0279	0.5826	0.0478888	0.3192
ENSSSCG00000016563	ENSMUSG00000029782	0.0274	0.5175	0.0529469	0.18615
ENSSSCG00000017646	ENSMUSG00000007646	0.1842	0.7552	0.243909	0.5618
ENSSSCG00000021466	ENSMUSG00000042742	0.0516	0.3293	0.156696	0.11625
ENSSSCG00000001708	ENSMUSG00000023932	0.0124	0.6347	0.0195368	0.32975
ENSSSCG00000015963	ENSMUSG00000027108	0.004	0.2448	0.0163399	0.1264
ENSSSCG00000008881	ENSMUSG00000062232	0.0318	0.8219	0.0386908	0.44275
ENSSSCG00000027389	ENSMUSG00000008429	0.0726	0.3577	0.202963	0.15145
ENSSSCG00000027374	ENSMUSG00000078584	0.1212	0.5721	0.211851	0.40725
ENSSSCG00000004697	ENSMUSG00000027245	0.0181	1.2003	0.0150796	0.51825
ENSSSCG00000021188	ENSMUSG00000047696	0.5376	1.3483	0.398724	1.21175
ENSSSCG00000006493	ENSMUSG00000028066	0.2019	0.9039	0.223365	0.55385
ENSSSCG00000024444	ENSMUSG00000026404	0.1623	0.9462	0.171528	0.5354
ENSSSCG00000024674	ENSMUSG00000026596	0.0273	0.3651	0.074774	0.10985
ENSSSCG00000014126	ENSMUSG00000014850	0.1358	0.7732	0.175634	0.5224
ENSSSCG00000004984	ENSMUSG00000035329	0.0275	0.353	0.0779037	0.104
ENSSSCG00000016817	ENSMUSG00000022241	0.0285	0.7373	0.0386546	0.39715
ENSSSCG00000008724	ENSMUSG00000029098	0.2095	1.4509	0.144393	0.73495
ENSSSCG00000016565	ENSMUSG00000039130	0.0946	0.5986	0.158035	0.3939
ENSSSCG00000023191	ENSMUSG00000028670	0.0103	0.2883	0.0357267	0.15445
ENSSSCG00000010550	ENSMUSG00000025200	0.0522	0.4603	0.113404	0.18235
ENSSSCG00000016920	ENSMUSG00000032727	0.0308	0.5796	0.0531401	0.3206
ENSSSCG00000010836	ENSMUSG00000046836	0.0355	0.8773	0.0404651	0.47415
ENSSSCG00000015637	ENSMUSG00000078974	0	0	0	0
ENSSSCG00000002469	ENSMUSG00000021203	0.0186	0.5495	0.033849	0.19335
ENSSSCG00000004701	ENSMUSG00000033486	0.2419	0.7217	0.335181	0.50275
ENSSSCG00000006494	ENSMUSG00000050144	0.0313	0.7167	0.0436724	0.38965
ENSSSCG00000011783	ENSMUSG00000003235	0.1883	0.7384	0.255011	0.5575
ENSSSCG00000000059	ENSMUSG00000022471	0.09	0.7939	0.113364	0.48695
ENSSSCG00000015996	ENSMUSG00000042369	0.0557	0.6132	0.090835	0.3623
ENSSSCG00000010551	ENSMUSG00000057506	0.026	0.7916	0.0328449	0.4218
ENSSSCG00000006730	ENSMUSG00000008763	0.0413	0.4501	0.0917574	0.16635
ENSSSCG00000011827	ENSMUSG00000022538	0.12	0.7244	0.165654	0.4822
ENSSSCG00000027815	ENSMUSG00000034893	0.0419	0.4881	0.0858431	0.18595
ENSSSCG00000022828	ENSMUSG00000020994	0.0318	0.3481	0.0913531	0.10585
ENSSSCG00000024600	ENSMUSG00000058440	0.0095	0.3768	0.0252123	0.1979
ENSSSCG00000023297	ENSMUSG00000008226	0.1611	0.5089	0.316565	0.41555
ENSSSCG00000011943	ENSMUSG00000022641	0.0605	0.4436	0.136384	0.1823
ENSSSCG00000029708	ENSMUSG00000032519	0.0904	0.6777	0.133392	0.42925
ENSSSCG00000013331	ENSMUSG00000057234	0.1333	0.5679	0.234724	0.41725
ENSSSCG00000015965	ENSMUSG00000041762	0.0565	0.5894	0.0958602	0.3512
ENSSSCG00000026719	ENSMUSG00000075470	0.0747	0.7866	0.0949657	0.468
ENSSSCG00000014194	ENSMUSG00000024083	0.2416	0.5922	0.40797	0.5377
ENSSSCG00000003556	ENSMUSG00000012117	0.0388	0.6843	0.0567003	0.38095
ENSSSCG00000027540	ENSMUSG00000030180	0.0241	0.537	0.044879	0.1926
ENSSSCG00000000753	ENSMUSG00000045962	0.0921	0.4633	0.198791	0.32375
ENSSSCG00000023269	ENSMUSG00000036435	0.0181	0.738	0.0245257	0.3871
ENSSSCG00000005302	ENSMUSG00000028455	0.0222	0.4899	0.0453154	0.16715
ENSSSCG00000030099	ENSMUSG00000016510	0.2761	1.0579	0.260989	0.40505
ENSSSCG00000011558	ENSMUSG00000051256	0.0122	0.4709	0.0259078	0.14765
ENSSSCG00000004709	ENSMUSG00000050619	0.1122	0.3746	0.299519	0.1995
ENSSSCG00000013033	ENSMUSG00000024959	0.1641	0.8385	0.195707	0.58335
ENSSSCG00000002378	ENSMUSG00000021245	0.186	0.5606	0.331787	0.4663
ENSSSCG00000004710	ENSMUSG00000027259	0.1163	0.4431	0.262469	0.33785
ENSSSCG00000027063	ENSMUSG00000043067	0.0592	0.5725	0.103406	0.34545
ENSSSCG00000030495	ENSMUSG00000052798	0.1366	0.7047	0.193841	0.48895
ENSSSCG00000016750	ENSMUSG00000002741	0.0209	0.5809	0.0359787	0.31135
ENSSSCG00000003089	ENSMUSG00000002984	0.0517	0.6533	0.0791367	0.37835
ENSSSCG00000014409	ENSMUSG00000024491	0.0793	0.7348	0.107921	0.4467
ENSSSCG00000014440	ENSMUSG00000024622	0.0965	0.9418	0.102463	0.5674
ENSSSCG00000005774	ENSMUSG00000053950	0.123	0.8942	0.137553	0.5701
ENSSSCG00000025991	ENSMUSG00000029125	0.0378	0.7919	0.0477333	0.43375
ENSSSCG00000010002	ENSMUSG00000002129	0.009	0.4969	0.0181123	0.15745
ENSSSCG00000005773	ENSMUSG00000024570	0.3781	1.318	0.286874	1.0371
ENSSSCG00000001477	ENSMUSG00000024325	0.0162	0.5211	0.0310881	0.17675
ENSSSCG00000000060	ENSMUSG00000022472	0.0165	0.3298	0.0500303	0.1814
ENSSSCG00000016653	ENSMUSG00000014905	0.0225	0.4298	0.0523499	0.1374
ENSSSCG00000017155	ENSMUSG00000094973	0.0423	1.0524	0.0401938	0.5685
ENSSSCG00000015964	ENSMUSG00000008226	0.0862	0.6586	0.130884	0.4155
ENSSSCG00000003815	ENSMUSG00000073792	0.0896	0.4465	0.200672	0.31285
ENSSSCG00000011997	ENSMUSG00000004843	0	0	0	0
ENSSSCG00000028721	ENSMUSG00000054484	0.2031	0.5057	0.401622	0.45595
ENSSSCG00000028867	ENSMUSG00000015757	0.0184	0.5265	0.0349478	0.18165
ENSSSCG00000023164	ENSMUSG00000023572	0.3099	0.5213	0.594475	0.57055
ENSSSCG00000004989	ENSMUSG00000035329	0.031	0.3522	0.0880182	0.1071
ENSSSCG00000005779	ENSMUSG00000034006	0.0645	1.0225	0.0630807	0.57575
ENSSSCG00000004324	ENSMUSG00000045854	0.0616	0.6785	0.0907885	0.40085
ENSSSCG00000008909	ENSMUSG00000029238	0.0229	0.3509	0.0652608	0.19835
ENSSSCG00000025750	ENSMUSG00000028452	0.0398	0.4316	0.092215	0.1556
ENSSSCG00000011616	ENSMUSG00000030058	0.0208	0.7117	0.0292258	0.37665
ENSSSCG00000008732	ENSMUSG00000067365	0.0887	0.5861	0.151339	0.38175
ENSSSCG00000010468	ENSMUSG00000039652	0.0085	0.3567	0.0238295	0.18685
ENSSSCG00000008890	ENSMUSG00000025591	0.1861	0.8198	0.227007	0.596
ENSSSCG00000000529	ENSMUSG00000022789	0.0066	0.4427	0.0149085	0.12795
ENSSSCG00000023603	ENSMUSG00000039568	0.0429	0.537	0.0798883	0.3114
ENSSSCG00000028258	ENSMUSG00000039285	0.1153	0.4977	0.231666	0.36415
ENSSSCG00000009419	ENSMUSG00000022008	0.0606	0.6324	0.0958254	0.3768
ENSSSCG00000008911	ENSMUSG00000029238	0.0766	0.7015	0.109195	0.42735
ENSSSCG00000004716	ENSMUSG00000054484	0.1021	0.5865	0.174084	0.39535
ENSSSCG00000004717	ENSMUSG00000027272	0.0722	0.6114	0.11809	0.3779
ENSSSCG00000030679	ENSMUSG00000047227	0.0128	0.341	0.0375367	0.1833
ENSSSCG00000021709	ENSMUSG00000047227	0.0128	0.341	0.0375367	0.1833
ENSSSCG00000023731	ENSMUSG00000029234	0.013	0.5845	0.0222412	0.30525
ENSSSCG00000026692	ENSMUSG00000071176	0.1394	1.5202	0.0916985	0.4995
ENSSSCG00000015997	ENSMUSG00000002731	0.0103	0.4733	0.0217621	0.14695
ENSSSCG00000029617	ENSMUSG00000041777	0.0133	0.5066	0.0262535	0.1666
ENSSSCG00000005787	ENSMUSG00000033323	0.2097	1.5708	0.133499	0.7951
ENSSSCG00000006896	ENSMUSG00000063406	0.0576	0.4475	0.128715	0.18135
ENSSSCG00000009096	ENSMUSG00000027714	0.0452	0.4754	0.0950778	0.1829
ENSSSCG00000005786	ENSMUSG00000030512	0.0109	0.5069	0.0215033	0.16435
ENSSSCG00000010469	ENSMUSG00000023307	0.0188	0.3278	0.057352	0.1827
ENSSSCG00000014416	ENSMUSG00000024498	0.0121	0.4299	0.0281461	0.12705
ENSSSCG00000021290	ENSMUSG00000032239	0.0541	0.7938	0.0681532	0.451
ENSSSCG00000027765	ENSMUSG00000035614	0.0717	0.5043	0.142177	0.32385
ENSSSCG00000028407	ENSMUSG00000026608	0.0246	0.8623	0.0285284	0.45575
ENSSSCG00000022666	ENSMUSG00000025364	0.0682	0.4598	0.148325	0.1981
ENSSSCG00000021216	ENSMUSG00000028619	0.0639	0.3868	0.165202	0.1573
ENSSSCG00000000083	ENSMUSG00000051518	0.1693	1.5284	0.110769	0.7335
ENSSSCG00000004327	ENSMUSG00000028282	0.236	0.6827	0.345686	0.57735
ENSSSCG00000004329	ENSMUSG00000058006	0.0753	0.5944	0.126682	0.3725
ENSSSCG00000024959	ENSMUSG00000033323	0.0559	0.8982	0.0622356	0.505
ENSSSCG00000004997	ENSMUSG00000035597	0.0261	0.3753	0.0695444	0.11375
ENSSSCG00000025374	ENSMUSG00000003233	0.006	0.657	0.00913242	0.3345
ENSSSCG00000002381	ENSMUSG00000034290	0.0256	0.4085	0.0626683	0.12985
ENSSSCG00000023976	ENSMUSG00000041477	0.2417	1.0605	0.227911	0.57195
ENSSSCG00000004724	ENSMUSG00000027285	0.2087	0.4084	0.511019	0.4129
ENSSSCG00000009772	ENSMUSG00000029390	0.0023	0.292	0.00787671	0.1483
ENSSSCG00000010438	ENSMUSG00000013662	0	0	0	0
ENSSSCG00000008728	ENSMUSG00000029127	0.1794	1.3923	0.128852	0.47555
ENSSSCG00000005310	ENSMUSG00000028458	0.0376	0.4287	0.087707	0.15195
ENSSSCG00000011562	ENSMUSG00000030286	0.0035	0.4392	0.00796903	0.1231
ENSSSCG00000010219	ENSMUSG00000019947	0.092	0.6648	0.138387	0.4244
ENSSSCG00000008892	ENSMUSG00000033883	0.5896	1.367	0.431309	1.2731
ENSSSCG00000002865	ENSMUSG00000063808	0.0918	0.7141	0.128553	0.44885
ENSSSCG00000014197	ENSMUSG00000024259	0.0558	0.4734	0.117871	0.1925
ENSSSCG00000012265	ENSMUSG00000037347	0.0871	1.2762	0.0682495	0.5252
ENSSSCG00000015530	ENSMUSG00000026466	0.0894	0.7279	0.122819	0.45335
ENSSSCG00000009420	ENSMUSG00000022009	0.196	0.4605	0.425624	0.42625
ENSSSCG00000010844	ENSMUSG00000078185	0.1701	0.8547	0.199017	0.59745
ENSSSCG00000010470	ENSMUSG00000056999	0.0202	0.5451	0.0370574	0.19275
ENSSSCG00000004583	ENSMUSG00000033543	0	0	0	0
ENSSSCG00000025940	ENSMUSG00000029617	0.0187	0.7017	0.0266496	0.36955
ENSSSCG00000029697	ENSMUSG00000014763	0.156	0.7082	0.220277	0.5101
ENSSSCG00000006927	ENSMUSG00000004591	0.0326	0.4884	0.0667486	0.1768
ENSSSCG00000000970	ENSMUSG00000036561	0.2261	1.2042	0.18776	0.4282
ENSSSCG00000006799	ENSMUSG00000056260	0.2075	0.3383	0.613361	0.37665
ENSSSCG00000008459	ENSMUSG00000024251	0.2228	0.6341	0.351364	0.53985
ENSSSCG00000008735	ENSMUSG00000061755	0.2399	0.9423	0.25459	0.51105
ENSSSCG00000027327	ENSMUSG00000044957	0.3682	0.9651	0.381515	0.45075
ENSSSCG00000016346	ENSMUSG00000034509	0.1725	0.8622	0.20007	0.5036
ENSSSCG00000007943	ENSMUSG00000063445	0.0769	0.938	0.0819829	0.5459
ENSSSCG00000005315	ENSMUSG00000028463	0.1704	0.5336	0.31934	0.4372
ENSSSCG00000014132	ENSMUSG00000078958	0.1408	0.7167	0.196456	0.49915
ENSSSCG00000026264	ENSMUSG00000063172	0.0788	0.3987	0.197642	0.17815
ENSSSCG00000011797	ENSMUSG00000004462	0.0976	0.4584	0.212914	0.3268
ENSSSCG00000015107	ENSMUSG00000032127	0.011	0.5002	0.0219912	0.1611
ENSSSCG00000002820	ENSMUSG00000050079	0.0135	0.3039	0.0444225	0.16545
ENSSSCG00000009353	ENSMUSG00000036580	0.0797	0.9533	0.0836043	0.55635
ENSSSCG00000015486	ENSMUSG00000026698	0.0311	0.5771	0.0538901	0.31965
ENSSSCG00000030211	ENSMUSG00000017119	0.0963	0.4067	0.236784	0.19965
ENSSSCG00000000766	ENSMUSG00000071226	0.2278	1.0833	0.210283	0.56945
ENSSSCG00000025264	ENSMUSG00000031157	0.0616	0.8671	0.0710414	0.49515
ENSSSCG00000022940	ENSMUSG00000029405	0.0148	0.4151	0.0356541	0.12235
ENSSSCG00000007853	ENSMUSG00000030922	0.0671	0.5466	0.122759	0.3404
ENSSSCG00000007237	ENSMUSG00000027472	0.0542	0.4995	0.108509	0.30395
ENSSSCG00000003987	ENSMUSG00000090714	0.4919	1.0919	0.450499	1.03785
ENSSSCG00000022806	ENSMUSG00000027162	0	0	0	0
ENSSSCG00000021250	ENSMUSG00000029781	0.0365	0.6522	0.0559644	0.3626
ENSSSCG00000022727	ENSMUSG00000024019	0.0721	0.5569	0.129467	0.35055
ENSSSCG00000022647	ENSMUSG00000031158	0.0143	0.6185	0.0231205	0.32355
ENSSSCG00000010502	ENSMUSG00000025010	0.0212	0.6466	0.0327869	0.3445
ENSSSCG00000011302	ENSMUSG00000066233	0.1618	0.7932	0.203984	0.5584
ENSSSCG00000002330	ENSMUSG00000021140	0.0535	0.6159	0.0868648	0.36145
ENSSSCG00000011798	ENSMUSG00000004460	0.0116	0.5376	0.0215774	0.1804
ENSSSCG00000016826	ENSMUSG00000022248	0.0647	0.5275	0.122654	0.32845
ENSSSCG00000013855	ENSMUSG00000003039	0.0179	1.307	0.0136955	0.5714
ENSSSCG00000005004	ENSMUSG00000034883	0.0983	0.5391	0.182341	0.36785
ENSSSCG00000030451	ENSMUSG00000033728	0.0302	1.6088	0.0187718	0.4346
ENSSSCG00000020710	ENSMUSG00000057637	0.1077	1.2741	0.0845303	0.54475
ENSSSCG00000005005	ENSMUSG00000049751	0	0	0	0
ENSSSCG00000008464	ENSMUSG00000055817	0.0781	1.4188	0.0550465	0.5875
ENSSSCG00000006697	ENSMUSG00000028093	0.152	0.6155	0.246954	0.45975
ENSSSCG00000007246	ENSMUSG00000068040	0.0134	0.4694	0.0285471	0.1481
ENSSSCG00000000684	ENSMUSG00000038429	0.0092	0.5815	0.0158212	0.19995
ENSSSCG00000004730	ENSMUSG00000033808	0.0733	0.5171	0.141752	0.33185
ENSSSCG00000016572	ENSMUSG00000012535	0.0186	0.4594	0.0404876	0.1483
ENSSSCG00000017287	ENSMUSG00000020708	0	0	0	0
ENSSSCG00000021024	ENSMUSG00000048175	0.0113	0.4455	0.0253648	0.13405
ENSSSCG00000023663	ENSMUSG00000024019	0.0297	0.819	0.0362637	0.4392
ENSSSCG00000030570	ENSMUSG00000024019	0.0242	0.7701	0.0314245	0.40925
ENSSSCG00000016349	ENSMUSG00000026260	0.1287	1.768	0.0727941	1.0127
ENSSSCG00000011613	ENSMUSG00000044927	0.0922	1.9293	0.0477894	1.05685
ENSSSCG00000022464	ENSMUSG00000059486	0.0074	0.4028	0.0183714	0.1088
ENSSSCG00000008515	ENSMUSG00000058704	0.003	0.1598	0.0187735	0.0829
ENSSSCG00000027846	ENSMUSG00000001305	0.1926	1.117	0.172426	0.5511
ENSSSCG00000005833	ENSMUSG00000015092	0.0085	0.9053	0.00938915	0.46115
ENSSSCG00000024635	ENSMUSG00000036580	0.0867	1.0154	0.0853851	0.5944
ENSSSCG00000005007	ENSMUSG00000020973	0.2513	0.7246	0.346812	0.5136
ENSSSCG00000028856	ENSMUSG00000003234	0.0164	0.515	0.0318447	0.1739
ENSSSCG00000007854	ENSMUSG00000048787	0.0197	0.2958	0.0665991	0.1676
ENSSSCG00000029173	ENSMUSG00000012422	0.0198	0.2556	0.0774648	0.1476
ENSSSCG00000026576	ENSMUSG00000037525	0.1052	0.6866	0.153219	0.4485
ENSSSCG00000014135	ENSMUSG00000021615	0.1423	0.6489	0.219294	0.46675
ENSSSCG00000014168	ENSMUSG00000001542	0.0426	0.353	0.12068	0.1191
ENSSSCG00000016753	ENSMUSG00000020471	0.0374	0.8813	0.0424373	0.47805
ENSSSCG00000014804	ENSMUSG00000030842	0.0028	0.528	0.00530303	0.1668
ENSSSCG00000017288	ENSMUSG00000020706	0.0641	0.6898	0.0929255	0.409
ENSSSCG00000000209	ENSMUSG00000023009	0.0802	0.6171	0.129963	0.38875
ENSSSCG00000007826	ENSMUSG00000030763	0.0894	0.8155	0.109626	0.49715
ENSSSCG00000000417	ENSMUSG00000044617	0.0832	0.8186	0.101637	0.4925
ENSSSCG00000017058	ENSMUSG00000020397	0.0138	0.479	0.02881	0.1533
ENSSSCG00000013631	ENSMUSG00000032180	0.0269	0.9613	0.0279829	0.50755
ENSSSCG00000016488	ENSMUSG00000029911	0.0939	0.4817	0.194935	0.33475
ENSSSCG00000016827	ENSMUSG00000022247	0.0386	0.5386	0.0716673	0.3079
ENSSSCG00000007244	ENSMUSG00000046020	0.0546	0.591	0.0923858	0.3501
ENSSSCG00000005826	ENSMUSG00000036504	0.0957	1.7701	0.0540647	0.78075
ENSSSCG00000017065	ENSMUSG00000020514	0.1244	0.5718	0.217559	0.4103
ENSSSCG00000017289	ENSMUSG00000020705	0.0394	0.5233	0.0752914	0.30105
ENSSSCG00000030578	ENSMUSG00000033845	0.0483	0.7016	0.0688426	0.3991
ENSSSCG00000014129	ENSMUSG00000021621	0.1041	0.8838	0.117787	0.546
ENSSSCG00000025001	ENSMUSG00000029469	0.0767	0.8352	0.0918343	0.4943
ENSSSCG00000030222	ENSMUSG00000029466	0.0067	0.6978	0.00960161	0.3556
ENSSSCG00000001941	ENSMUSG00000047022	0.0905	0.46	0.196739	0.3205
ENSSSCG00000030155	ENSMUSG00000023883	0.0751	0.7698	0.0975578	0.46
ENSSSCG00000004589	ENSMUSG00000032217	0.0528	0.464	0.113793	0.1848
ENSSSCG00000011881	ENSMUSG00000022837	0.07	0.3688	0.189805	0.1544
ENSSSCG00000028698	ENSMUSG00000078622	0.0172	0.5356	0.0321135	0.185
ENSSSCG00000011615	ENSMUSG00000079477	0.0207	0.5797	0.0357081	0.31055
ENSSSCG00000010223	ENSMUSG00000057134	0.0537	1.204	0.0446013	0.5557
ENSSSCG00000001094	ENSMUSG00000019132	0.004	0.1852	0.0215983	0.0966
ENSSSCG00000013784	ENSMUSG00000005483	0.0197	0.56	0.0351786	0.1997
ENSSSCG00000017546	ENSMUSG00000075595	0.0475	0.5107	0.0930096	0.30285
ENSSSCG00000028025	ENSMUSG00000042729	0.0578	0.56	0.103214	0.3378
ENSSSCG00000009808	ENSMUSG00000054434	0.0315	0.6129	0.051395	0.33795
ENSSSCG00000026839	ENSMUSG00000035297	0.0839	0.2703	0.310396	0.11905
ENSSSCG00000008587	ENSMUSG00000037361	0	0	0	0
ENSSSCG00000004339	ENSMUSG00000040359	0.0533	0.6571	0.081114	0.38185
ENSSSCG00000009139	ENSMUSG00000027999	0.0554	0.9726	0.0569607	0.5417
ENSSSCG00000014199	ENSMUSG00000038299	0.0634	0.5813	0.109066	0.35405
ENSSSCG00000005320	ENSMUSG00000028468	0.0166	0.5636	0.0294535	0.1984
ENSSSCG00000005837	ENSMUSG00000036186	0.0754	1.7982	0.0419308	0.7745
ENSSSCG00000028178	ENSMUSG00000026526	0.0238	0.7066	0.0336824	0.3771
ENSSSCG00000009946	ENSMUSG00000018974	0.0745	1.0242	0.0727397	0.5866
ENSSSCG00000016934	ENSMUSG00000021694	0.0483	0.5934	0.0813953	0.345
ENSSSCG00000013780	ENSMUSG00000031708	0.0588	0.7604	0.0773277	0.439
ENSSSCG00000022636	ENSMUSG00000030313	0.0263	0.4342	0.0605712	0.1434
ENSSSCG00000029556	ENSMUSG00000014426	0.0281	1.2479	0.0225178	0.55205
ENSSSCG00000010196	ENSMUSG00000072623	0.1803	0.7513	0.239984	0.55595
ENSSSCG00000005322	ENSMUSG00000028469	0.0076	0.4368	0.0173993	0.126
ENSSSCG00000004342	ENSMUSG00000028261	0.1993	0.6169	0.323067	0.50775
ENSSSCG00000027842	ENSMUSG00000050088	0.1284	1.4319	0.0896711	0.44435
ENSSSCG00000015427	ENSMUSG00000029012	0.0405	0.5034	0.0804529	0.1922
ENSSSCG00000024216	ENSMUSG00000022412	0.0124	0.4392	0.0282332	0.132
ENSSSCG00000001095	ENSMUSG00000006715	0.119	0.6755	0.176166	0.45675
ENSSSCG00000020723	ENSMUSG00000047022	0.6354	0.6835	0.929627	0.77715
ENSSSCG00000003902	ENSMUSG00000028706	0.1262	0.6392	0.197434	0.4458
ENSSSCG00000008004	ENSMUSG00000057411	0.1698	1.0138	0.167489	0.5767
ENSSSCG00000000490	ENSMUSG00000055531	0	0	0	0
ENSSSCG00000010250	ENSMUSG00000020078	0.0042	0.5595	0.0075067	0.18395
ENSSSCG00000007248	ENSMUSG00000042548	0.2186	0.5543	0.394371	0.49575
ENSSSCG00000022212	ENSMUSG00000029402	0.0531	1.2052	0.0440591	0.5557
ENSSSCG00000008516	ENSMUSG00000024067	0.0101	0.4886	0.0206713	0.1544
ENSSSCG00000005842	ENSMUSG00000026939	0.1147	0.6254	0.183403	0.4274
ENSSSCG00000026293	ENSMUSG00000010110	0.0284	0.5212	0.0544896	0.189
ENSSSCG00000006499	ENSMUSG00000028062	0.0038	0.5462	0.00695716	0.1769
ENSSSCG00000007251	ENSMUSG00000056941	0.0515	0.54	0.0953704	0.3215
ENSSSCG00000004592	ENSMUSG00000032212	0.0435	0.3119	0.139468	0.19945
ENSSSCG00000017733	ENSMUSG00000057181	0.055	0.3982	0.138122	0.1541
ENSSSCG00000004590	ENSMUSG00000032212	0.0669	0.6819	0.0981082	0.40785
ENSSSCG00000004350	ENSMUSG00000028248	0.054	0.8611	0.0627105	0.48455
ENSSSCG00000006361	ENSMUSG00000062729	0.0913	0.4466	0.204433	0.3146
ENSSSCG00000005841	ENSMUSG00000015087	0.1967	1.5222	0.129221	0.7578
ENSSSCG00000000491	ENSMUSG00000020171	0.1047	0.9285	0.112763	0.56895
ENSSSCG00000016376	ENSMUSG00000026275	0.054	1.0887	0.0496004	0.59835
ENSSSCG00000029981	ENSMUSG00000030313	0.026	0.4392	0.0591985	0.1456
ENSSSCG00000008808	ENSMUSG00000029209	0.0159	0.6032	0.0263594	0.3175
ENSSSCG00000026593	ENSMUSG00000030313	0.0216	0.5642	0.0382843	0.3037
ENSSSCG00000016071	ENSMUSG00000025983	0.0815	0.8085	0.100804	0.48575
ENSSSCG00000004010	ENSMUSG00000036552	0.2512	0.9331	0.26921	0.51775
ENSSSCG00000000972	ENSMUSG00000051786	0.1781	1.2403	0.143594	0.59825
ENSSSCG00000017669	ENSMUSG00000020513	0.0734	0.6389	0.114885	0.39285
ENSSSCG00000029638	ENSMUSG00000028251	0.1914	0.3965	0.482724	0.38965
ENSSSCG00000001820	ENSMUSG00000030532	0.0389	0.7899	0.0492467	0.43385
ENSSSCG00000009425	ENSMUSG00000044350	0.1227	0.621	0.197585	0.4332
ENSSSCG00000004353	ENSMUSG00000028252	0.0097	0.2831	0.0342635	0.15125
ENSSSCG00000030454	ENSMUSG00000034544	0.0558	0.7422	0.0751819	0.4269
ENSSSCG00000003085	ENSMUSG00000002981	0.0243	0.7269	0.0334296	0.38775
ENSSSCG00000006828	ENSMUSG00000048997	0.0659	0.4033	0.163402	0.16755
ENSSSCG00000017294	ENSMUSG00000049354	0	0	0	0
ENSSSCG00000013470	ENSMUSG00000029918	0.0583	0.6594	0.0884137	0.388
ENSSSCG00000026303	ENSMUSG00000049504	0.0449	0.8787	0.0510982	0.48425
ENSSSCG00000026665	ENSMUSG00000020525	0.0582	0.4753	0.122449	0.19585
ENSSSCG00000000534	ENSMUSG00000040029	0.0346	0.6501	0.0532226	0.35965
ENSSSCG00000030623	ENSMUSG00000037752	0.2461	1.3955	0.176353	0.74385
ENSSSCG00000024536	ENSMUSG00000035007	0.0858	0.7657	0.112054	0.46865
ENSSSCG00000000840	ENSMUSG00000034560	0.0181	0.5219	0.034681	0.17905
ENSSSCG00000023850	ENSMUSG00000042505	0.3211	1.2792	0.251016	0.7607
ENSSSCG00000023043	ENSMUSG00000009112	0.1875	0.7403	0.253276	0.55765
ENSSSCG00000000841	ENSMUSG00000020263	0.0484	0.5068	0.0955012	0.3018
ENSSSCG00000000215	ENSMUSG00000023018	0.0904	0.5328	0.16967	0.3568
ENSSSCG00000008267	ENSMUSG00000068329	0.0281	0.3547	0.0792219	0.10545
ENSSSCG00000004220	ENSMUSG00000019792	0.0296	0.4325	0.0684393	0.14585
ENSSSCG00000024797	ENSMUSG00000059939	0.1974	0.7324	0.269525	0.5636
ENSSSCG00000017796	ENSMUSG00000020840	0.0236	0.4287	0.0550502	0.13795
ENSSSCG00000026216	ENSMUSG00000057715	0.1774	1.6349	0.108508	0.79485
ENSSSCG00000024570	ENSMUSG00000024201	0.2546	1.9992	0.127351	1.2542
ENSSSCG00000030428	ENSMUSG00000025209	0.0902	0.5616	0.160613	0.371
ENSSSCG00000009777	ENSMUSG00000049327	0.0377	0.5231	0.0720703	0.19925
ENSSSCG00000003192	ENSMUSG00000074141	0.2082	1.6486	0.126289	1.0325
ENSSSCG00000009820	ENSMUSG00000029464	0.03	1.1232	0.0267094	0.5916
ENSSSCG00000016494	ENSMUSG00000002413	0.0071	0.276	0.0257246	0.1451
ENSSSCG00000011642	ENSMUSG00000032547	0.0092	0.4469	0.0205863	0.13265
ENSSSCG00000000842	ENSMUSG00000022992	0.026	0.4592	0.0566202	0.1556
ENSSSCG00000025905	ENSMUSG00000094437	0.0772	0.5288	0.145991	0.3416
ENSSSCG00000030577	ENSMUSG00000031226	0.1041	0.6398	0.162707	0.424
ENSSSCG00000015692	ENSMUSG00000056211	0.0485	0.2519	0.192537	0.17445
ENSSSCG00000010473	ENSMUSG00000053799	0.1552	0.8657	0.179277	0.58805
ENSSSCG00000013035	ENSMUSG00000056612	0.0119	0.5887	0.020214	0.30625
ENSSSCG00000006500	ENSMUSG00000008604	0.0408	0.47	0.0868085	0.1758
ENSSSCG00000003580	ENSMUSG00000028886	0.0452	0.4108	0.110029	0.1506
ENSSSCG00000010327	ENSMUSG00000025280	0.0102	0.7058	0.0144517	0.3631
ENSSSCG00000009142	ENSMUSG00000001052	0.1187	0.6027	0.196947	0.42005
ENSSSCG00000015534	ENSMUSG00000033701	0.0749	0.4197	0.178461	0.18475
ENSSSCG00000004741	ENSMUSG00000098789	0.0651	0.6005	0.10841	0.36535
ENSSSCG00000005846	ENSMUSG00000013465	0.0289	1.9252	0.0150114	0.7915
ENSSSCG00000009356	ENSMUSG00000036615	0.1191	0.6273	0.189861	0.43275
ENSSSCG00000000066	ENSMUSG00000022394	0.0526	0.7598	0.0692287	0.4325
ENSSSCG00000016323	ENSMUSG00000034432	0.0376	0.7537	0.0498872	0.41445
ENSSSCG00000004737	ENSMUSG00000033852	0.1108	0.7641	0.145007	0.49285
ENSSSCG00000030508	ENSMUSG00000034560	0.0271	0.3649	0.0742669	0.10955
ENSSSCG00000006024	ENSMUSG00000022339	0.0129	0.6264	0.0205939	0.3261
ENSSSCG00000024081	ENSMUSG00000075000	0.093	0.6798	0.136805	0.4329
ENSSSCG00000027883	ENSMUSG00000020840	0.0942	0.4992	0.188702	0.3438
ENSSSCG00000026787	ENSMUSG00000037296	0.0117	0.3253	0.0359668	0.17435
ENSSSCG00000015694	ENSMUSG00000036086	0.1637	0.7452	0.219673	0.5363
ENSSSCG00000022866	ENSMUSG00000010097	0.0598	0.676	0.0884615	0.3978
ENSSSCG00000002762	ENSMUSG00000031921	0.0897	0.3721	0.241064	0.17575
ENSSSCG00000010737	ENSMUSG00000030965	0.0443	0.4028	0.10998	0.1457
ENSSSCG00000017069	ENSMUSG00000037331	0.0275	0.4935	0.0557244	0.17425
ENSSSCG00000001821	ENSMUSG00000030533	0.0291	0.6516	0.0446593	0.3549
ENSSSCG00000008470	ENSMUSG00000024246	0.2709	0.7609	0.356026	0.55135
ENSSSCG00000017335	ENSMUSG00000043372	0.1166	0.9512	0.122582	0.5922
ENSSSCG00000029799	ENSMUSG00000057572	0.0175	0.485	0.0360825	0.16
ENSSSCG00000014539	ENSMUSG00000046311	0.0605	0.4797	0.12612	0.30035
ENSSSCG00000017795	ENSMUSG00000037958	0.1595	0.727	0.219395	0.523
ENSSSCG00000021063	ENSMUSG00000030079	0.0042	0.912	0.00460526	0.4602
ENSSSCG00000015393	ENSMUSG00000042508	0.0286	0.3566	0.0802019	0.1069
ENSSSCG00000015695	ENSMUSG00000036104	0.0408	0.7299	0.0558981	0.40575
ENSSSCG00000015753	ENSMUSG00000031465	0.0842	1.0516	0.0800685	0.51
ENSSSCG00000011183	ENSMUSG00000032570	0.02	0.4521	0.044238	0.14605
ENSSSCG00000030397	ENSMUSG00000020525	0.0582	0.4246	0.13707	0.1705
ENSSSCG00000014203	ENSMUSG00000071856	0.02	0.8597	0.0232639	0.44985
ENSSSCG00000029179	ENSMUSG00000025868	0.0955	0.9006	0.10604	0.5458
ENSSSCG00000028762	ENSMUSG00000048832	0.0987	0.8616	0.114554	0.5295
ENSSSCG00000004221	ENSMUSG00000019791	0.2578	0.5966	0.432115	0.5561
ENSSSCG00000010560	ENSMUSG00000025208	0.0759	0.8796	0.0862892	0.5157
ENSSSCG00000010441	ENSMUSG00000071573	0.2031	0.525	0.386857	0.4656
ENSSSCG00000029722	ENSMUSG00000021037	0.032	0.4397	0.0727769	0.15185
ENSSSCG00000004358	ENSMUSG00000038774	0.1226	0.5775	0.212294	0.41135
ENSSSCG00000024096	ENSMUSG00000041135	0.1669	0.5352	0.311846	0.4345
ENSSSCG00000017678	ENSMUSG00000018481	0.0069	0.4319	0.0159759	0.12285
ENSSSCG00000009933	ENSMUSG00000029577	0.0375	0.7709	0.0486444	0.42295
ENSSSCG00000006093	ENSMUSG00000050323	0.0925	0.5836	0.158499	0.3843
ENSSSCG00000017670	ENSMUSG00000020516	0.0044	0.2654	0.0165787	0.1371
ENSSSCG00000025466	ENSMUSG00000050640	0.0757	1.3394	0.0565178	0.5454
ENSSSCG00000008415	ENSMUSG00000020305	0.0752	0.4692	0.160273	0.3098
ENSSSCG00000023579	ENSMUSG00000033902	0.0244	0.7398	0.0329819	0.3943
ENSSSCG00000001379	ENSMUSG00000001525	0	0	0	0
ENSSSCG00000017336	ENSMUSG00000048878	0.0625	0.6166	0.101362	0.3708
ENSSSCG00000026029	ENSMUSG00000098789	0.1084	0.6331	0.171221	0.42495
ENSSSCG00000012556	ENSMUSG00000031433	0.0702	0.4159	0.168791	0.17815
ENSSSCG00000010251	ENSMUSG00000020079	0.0673	0.6205	0.108461	0.37755
ENSSSCG00000027564	ENSMUSG00000085793	0.0041	0.4136	0.00991296	0.1109
ENSSSCG00000005015	ENSMUSG00000034801	0.0202	0.5894	0.0342721	0.3149
ENSSSCG00000030289	ENSMUSG00000043733	0.0078	0.7722	0.010101	0.3939
ENSSSCG00000024969	ENSMUSG00000033852	0.0999	0.9127	0.109455	0.55625
ENSSSCG00000000843	ENSMUSG00000020250	0.0583	0.7264	0.0802588	0.4215
ENSSSCG00000029989	ENSMUSG00000015804	0.0321	0.5894	0.0544622	0.3268
ENSSSCG00000025959	ENSMUSG00000031826	0.2397	0.9613	0.24935	0.52035
ENSSSCG00000029134	ENSMUSG00000030583	0.1162	1.019	0.114033	0.5257
ENSSSCG00000008974	ENSMUSG00000029415	0.035	0.6082	0.0575469	0.3391
ENSSSCG00000024761	ENSMUSG00000020590	0.0159	0.3554	0.0447383	0.1936
ENSSSCG00000017502	ENSMUSG00000038208	0.0692	0.6024	0.114874	0.3704
ENSSSCG00000008635	ENSMUSG00000061458	0.049	0.8979	0.0545718	0.49795
ENSSSCG00000027190	ENSMUSG00000067825	0.2039	0.9746	0.209214	0.5912
ENSSSCG00000006661	ENSMUSG00000015747	0.0119	0.4343	0.0274004	0.12905
ENSSSCG00000022645	ENSMUSG00000049932	0.0081	1.0987	0.00737235	0.55745
ENSSSCG00000011841	ENSMUSG00000022772	0.1469	0.3618	0.406025	0.3278
ENSSSCG00000023027	ENSMUSG00000057894	0.1419	0.5775	0.245714	0.43065
ENSSSCG00000021319	ENSMUSG00000033809	0.0687	0.523	0.131358	0.3302
ENSSSCG00000000691	ENSMUSG00000030127	0.0338	0.6348	0.0532451	0.3512
ENSSSCG00000009811	ENSMUSG00000029475	0.0088	0.9195	0.00957042	0.46855
ENSSSCG00000008268	ENSMUSG00000068328	0.0496	0.3402	0.145797	0.1197
ENSSSCG00000010587	ENSMUSG00000025034	0.0067	0.5586	0.0119943	0.186
ENSSSCG00000003757	ENSMUSG00000036825	0.0699	0.7464	0.0936495	0.4431
ENSSSCG00000005973	ENSMUSG00000037075	0.0349	0.3993	0.087403	0.13455
ENSSSCG00000008924	ENSMUSG00000035898	0.0547	0.4814	0.113627	0.1954
ENSSSCG00000005058	ENSMUSG00000037526	0.0367	0.7835	0.0468411	0.42845
ENSSSCG00000001010	ENSMUSG00000021400	0.0519	1.4988	0.0346277	0.4013
ENSSSCG00000016289	ENSMUSG00000026254	0.0055	0.4418	0.0124491	0.1264
ENSSSCG00000025952	ENSMUSG00000000976	0.0907	0.7062	0.128434	0.4438
ENSSSCG00000021845	ENSMUSG00000032637	0.0392	0.4388	0.0893345	0.1586
ENSSSCG00000004745	ENSMUSG00000034032	0.1287	0.5156	0.249612	0.3865
ENSSSCG00000008035	ENSMUSG00000040888	0.116	0.9415	0.123208	0.58675
ENSSSCG00000001960	ENSMUSG00000054302	0.0626	0.8388	0.0746304	0.482
ENSSSCG00000008222	ENSMUSG00000053119	0.0118	0.6733	0.0175256	0.34845
ENSSSCG00000006347	ENSMUSG00000026659	0.1076	0.7135	0.150806	0.46435
ENSSSCG00000010137	ENSMUSG00000005732	0.0324	0.9767	0.0331729	0.52075
ENSSSCG00000009823	ENSMUSG00000029462	0.0028	0.6674	0.00419539	0.3365
ENSSSCG00000022656	ENSMUSG00000024528	0.2675	0.7266	0.368153	0.5308
ENSSSCG00000003998	ENSMUSG00000021514	0.425	2.4472	0.173668	1.6486
ENSSSCG00000009370	ENSMUSG00000044167	0.0391	0.5472	0.0714547	0.3127
ENSSSCG00000001876	ENSMUSG00000032288	0.0171	1.0441	0.0163777	0.53915
ENSSSCG00000029123	ENSMUSG00000000976	0.1009	0.6424	0.157067	0.4221
ENSSSCG00000028343	ENSMUSG00000028140	0.1263	0.5379	0.234802	0.39525
ENSSSCG00000022958	ENSMUSG00000059273	0.0741	0.5726	0.12941	0.3604
ENSSSCG00000017385	ENSMUSG00000078652	0	0	0	0
ENSSSCG00000002806	ENSMUSG00000031790	0.0618	0.738	0.0837398	0.4308
ENSSSCG00000012984	ENSMUSG00000024941	0.0568	0.7207	0.0788123	0.41715
ENSSSCG00000016948	ENSMUSG00000021712	0.0122	0.3886	0.0313948	0.1065
ENSSSCG00000005016	ENSMUSG00000020988	0.0936	0.5297	0.176704	0.35845
ENSSSCG00000029113	ENSMUSG00000022120	0.111	0.6518	0.170298	0.4369
ENSSSCG00000003973	ENSMUSG00000028633	0.0072	1.0755	0.00669456	0.54495
ENSSSCG00000016005	ENSMUSG00000042272	0.0077	0.5097	0.0151069	0.16255
ENSSSCG00000015972	ENSMUSG00000027104	0.0384	0.339	0.113274	0.1079
ENSSSCG00000027782	ENSMUSG00000037085	0.1324	0.6551	0.202107	0.45995
ENSSSCG00000017301	ENSMUSG00000020694	0.0032	0.3345	0.00956652	0.17045
ENSSSCG00000029279	ENSMUSG00000034781	0.0125	3.9259	0.00318398	1.97545
ENSSSCG00000030408	ENSMUSG00000040296	0.1757	0.8434	0.208323	0.5974
ENSSSCG00000011645	ENSMUSG00000032534	0.1098	0.578	0.189965	0.3988
ENSSSCG00000012861	ENSMUSG00000045362	0.8362	13.9254	0.0600485	7.7989
ENSSSCG00000023533	ENSMUSG00000041258	0.085	0.9922	0.0856682	0.5811
ENSSSCG00000004134	ENSMUSG00000019809	0.0304	0.4423	0.0687316	0.15155
ENSSSCG00000004224	ENSMUSG00000000295	0.0947	0.8386	0.112926	0.514
ENSSSCG00000023078	ENSMUSG00000024037	0.1604	0.8236	0.194755	0.5722
ENSSSCG00000007395	ENSMUSG00000045503	0.0167	0.2907	0.0574475	0.16205
ENSSSCG00000021794	ENSMUSG00000050088	0.1284	1.4319	0.0896711	0.44435
ENSSSCG00000007767	ENSMUSG00000049728	0.0395	1.2063	0.0327448	0.54265
ENSSSCG00000001877	ENSMUSG00000055334	0.0359	0.4061	0.0884019	0.13895
ENSSSCG00000004012	ENSMUSG00000023885	0.0696	2.0292	0.0342992	1.0842
ENSSSCG00000027498	ENSMUSG00000047879	0.0374	0.3857	0.0969666	0.13025
ENSSSCG00000017685	ENSMUSG00000000804	0.0427	0.3549	0.120316	0.12015
ENSSSCG00000015095	ENSMUSG00000059890	0.025	0.369	0.0677507	0.1095
ENSSSCG00000008920	ENSMUSG00000029253	0.3891	0.9629	0.404092	0.47055
ENSSSCG00000017339	ENSMUSG00000020936	0.0236	0.504	0.0468254	0.1756
ENSSSCG00000014325	ENSMUSG00000024370	0.0215	0.4999	0.0430086	0.17145
ENSSSCG00000009427	ENSMUSG00000022013	0.235	0.4923	0.477351	0.48115
ENSSSCG00000013539	ENSMUSG00000002658	0.0403	1.3713	0.0293882	0.52595
ENSSSCG00000024259	ENSMUSG00000036398	0.0556	0.4072	0.136542	0.1592
ENSSSCG00000003093	ENSMUSG00000023118	0.0243	0.7935	0.0306238	0.42105
ENSSSCG00000023223	ENSMUSG00000059878	0.1407	1.1667	0.120597	0.52405
ENSSSCG00000016677	ENSMUSG00000029777	0.0439	0.5278	0.0831754	0.3078
ENSSSCG00000016949	ENSMUSG00000021711	0.0164	0.5639	0.0290832	0.19835
ENSSSCG00000015826	ENSMUSG00000031485	0.0815	0.7547	0.10799	0.45885
ENSSSCG00000005354	ENSMUSG00000035601	0.1212	0.6096	0.198819	0.426
ENSSSCG00000015343	ENSMUSG00000042447	0.0094	0.5008	0.01877	0.1598
ENSSSCG00000027323	ENSMUSG00000022774	0.0086	0.4609	0.0186591	0.13905
ENSSSCG00000001201	ENSMUSG00000063894	0.1163	0.4345	0.267664	0.33355
ENSSSCG00000004861	ENSMUSG00000046982	0.075	1.0805	0.0694123	0.51525
ENSSSCG00000000846	ENSMUSG00000020246	0.0527	0.4544	0.115977	0.1799
ENSSSCG00000001679	ENSMUSG00000067150	0.086	0.535	0.160748	0.3535
ENSSSCG00000023926	ENSMUSG00000041135	0.0548	0.698	0.07851	0.4038
ENSSSCG00000012939	ENSMUSG00000080268	0.0389	1.3793	0.0282027	0.52855
ENSSSCG00000025521	ENSMUSG00000036632	0.153	0.7707	0.198521	0.53835
ENSSSCG00000014235	ENSMUSG00000024534	0.0732	0.7461	0.0981102	0.44625
ENSSSCG00000010741	ENSMUSG00000039990	0.0364	0.6947	0.0523967	0.38375
ENSSSCG00000026613	ENSMUSG00000027752	0.0852	0.6138	0.138807	0.3921
ENSSSCG00000008608	ENSMUSG00000020621	0.0659	0.6158	0.107015	0.3738
ENSSSCG00000012622	ENSMUSG00000006423	0.002	0.5584	0.00358166	0.1812
ENSSSCG00000013601	ENSMUSG00000079557	0.0507	0.788	0.0643401	0.4447
ENSSSCG00000002337	ENSMUSG00000042628	0.0158	0.5227	0.0302277	0.17715
ENSSSCG00000005355	ENSMUSG00000028322	0.0645	0.5945	0.108495	0.36175
ENSSSCG00000000848	ENSMUSG00000020251	0.0396	0.6293	0.0629271	0.35425
ENSSSCG00000015110	ENSMUSG00000032123	0.0272	0.4157	0.0654318	0.13505
ENSSSCG00000026960	ENSMUSG00000038535	0.1509	0.5659	0.266655	0.43385
ENSSSCG00000013573	ENSMUSG00000040236	0.0039	3.8844	0.00100402	1.9461
ENSSSCG00000001769	ENSMUSG00000062270	0.0037	0.428	0.00864486	0.1177
ENSSSCG00000015755	ENSMUSG00000031467	0.1315	0.4862	0.270465	0.3746
ENSSSCG00000010000	ENSMUSG00000025047	0.2742	1.0632	0.257901	0.4058
ENSSSCG00000012560	ENSMUSG00000031432	0	0	0	0
ENSSSCG00000007031	ENSMUSG00000031536	0.0295	0.5148	0.0573038	0.1869
ENSSSCG00000027514	ENSMUSG00000018565	0.1579	0.5147	0.306781	0.41525
ENSSSCG00000013005	ENSMUSG00000024797	0.0168	0.7614	0.0220646	0.3975
ENSSSCG00000003111	ENSMUSG00000052833	0.0386	0.6363	0.0606632	0.35675
ENSSSCG00000017386	ENSMUSG00000035086	0.0139	0.4506	0.0308478	0.1392
ENSSSCG00000014264	ENSMUSG00000020267	0.0356	0.4815	0.0739356	0.17635
ENSSSCG00000027953	ENSMUSG00000090273	0.2845	1.5718	0.181003	1.0704
ENSSSCG00000017799	ENSMUSG00000020841	0.0432	0.4535	0.0952591	0.16995
ENSSSCG00000000695	ENSMUSG00000038271	0.0251	0.7112	0.0352925	0.3807
ENSSSCG00000015492	ENSMUSG00000026709	0.147	0.6101	0.240944	0.45205
ENSSSCG00000004752	ENSMUSG00000048647	0.1569	0.6631	0.236616	0.48845
ENSSSCG00000002672	ENSMUSG00000034105	0.2431	1.5372	0.158145	1.0117
ENSSSCG00000010314	ENSMUSG00000021824	0.0011	0.341	0.00322581	0.1716
ENSSSCG00000014579	ENSMUSG00000047554	0.0524	0.6599	0.079406	0.38235
ENSSSCG00000010010	ENSMUSG00000020430	0.0567	1.0229	0.0554306	0.56815
ENSSSCG00000004368	ENSMUSG00000019849	0.02	0.8671	0.0230654	0.45355
ENSSSCG00000026521	ENSMUSG00000035202	0.0746	0.9454	0.0789084	0.5473
ENSSSCG00000000696	ENSMUSG00000038279	0.1418	0.6787	0.208929	0.48115
ENSSSCG00000003169	ENSMUSG00000003423	0.1039	0.8584	0.121039	0.5331
ENSSSCG00000011567	ENSMUSG00000033933	0.0996	0.7473	0.13328	0.47325
ENSSSCG00000013670	ENSMUSG00000066892	0.0353	1.3283	0.0265753	0.59945
ENSSSCG00000004753	ENSMUSG00000034154	0.016	0.4409	0.0362894	0.13645
ENSSSCG00000024932	ENSMUSG00000023021	0.1769	0.622	0.284405	0.4879
ENSSSCG00000017959	ENSMUSG00000044795	0.1045	0.7831	0.133444	0.49605
ENSSSCG00000028225	ENSMUSG00000041415	0.0587	0.5351	0.109699	0.32625
ENSSSCG00000020796	ENSMUSG00000089696	0.1644	0.7851	0.2094	0.55695
ENSSSCG00000008748	ENSMUSG00000015882	0.0334	0.1105	0.302262	0.08865
ENSSSCG00000028384	ENSMUSG00000017144	0.0027	0.4248	0.00635593	0.1151
ENSSSCG00000003904	ENSMUSG00000028703	0.0245	0.4253	0.0576064	0.13715
ENSSSCG00000007289	ENSMUSG00000038324	0.013	0.4433	0.0293255	0.13465
ENSSSCG00000005859	ENSMUSG00000006471	0.1297	0.8319	0.155908	0.54565
ENSSSCG00000003420	ENSMUSG00000055401	0.1395	1.211	0.115194	0.545
ENSSSCG00000003553	ENSMUSG00000046671	0.0253	0.3902	0.0648385	0.1204
ENSSSCG00000011620	ENSMUSG00000030079	0.0294	0.9063	0.0324396	0.48255
ENSSSCG00000030229	ENSMUSG00000042210	0.1083	0.6407	0.169034	0.42865
ENSSSCG00000009401	ENSMUSG00000022105	0.0451	0.4646	0.0970728	0.1774
ENSSSCG00000009226	ENSMUSG00000029312	0.0396	0.8331	0.0475333	0.45615
ENSSSCG00000017303	ENSMUSG00000020691	0.1382	0.5896	0.234396	0.433
ENSSSCG00000025765	ENSMUSG00000027180	0.0285	0.6751	0.042216	0.36605
ENSSSCG00000023954	ENSMUSG00000038736	0.1163	0.4326	0.26884	0.3326
ENSSSCG00000025966	ENSMUSG00000040731	0.0074	0.4356	0.0169881	0.1252
ENSSSCG00000003343	ENSMUSG00000029036	0.0496	1.4793	0.0335294	0.58925
ENSSSCG00000009359	ENSMUSG00000027751	0.0819	0.6448	0.127016	0.4043
ENSSSCG00000017940	ENSMUSG00000023170	0.012	0.595	0.0201681	0.3095
ENSSSCG00000000282	ENSMUSG00000009575	0.0096	0.478	0.0200837	0.1486
ENSSSCG00000021038	ENSMUSG00000048490	0.0992	0.69	0.143768	0.4442
ENSSSCG00000009372	ENSMUSG00000031533	0.2092	0.6249	0.334774	0.52165
ENSSSCG00000011953	ENSMUSG00000022601	0.0594	0.5864	0.101296	0.3526
ENSSSCG00000000536	ENSMUSG00000030304	0.0215	0.3506	0.0613234	0.1968
ENSSSCG00000008221	ENSMUSG00000053470	0.0448	0.4486	0.0998663	0.1691
ENSSSCG00000014061	ENSMUSG00000025872	0.0078	0.5982	0.0130391	0.3069
ENSSSCG00000004135	ENSMUSG00000019808	0.0623	0.731	0.0852257	0.4278
ENSSSCG00000001508	ENSMUSG00000051390	0.0763	0.6816	0.111942	0.4171
ENSSSCG00000002867	ENSMUSG00000056216	0.0843	0.5723	0.1473	0.37045
ENSSSCG00000005860	ENSMUSG00000078201	0.0035	2.5025	0.0013986	1.25475
ENSSSCG00000004603	ENSMUSG00000037674	0.0416	0.3258	0.127686	0.1045
ENSSSCG00000005364	ENSMUSG00000035517	0.0806	0.6893	0.11693	0.42525
ENSSSCG00000010564	ENSMUSG00000025218	0.1128	0.5537	0.20372	0.38965
ENSSSCG00000000980	ENSMUSG00000035845	0.164	1.7427	0.0941068	1.03535
ENSSSCG00000003554	ENSMUSG00000050989	0.04	1.0046	0.0398168	0.5423
ENSSSCG00000015756	ENSMUSG00000039814	0.2515	0.7967	0.315677	0.54985
ENSSSCG00000006913	ENSMUSG00000049606	0.1043	0.6312	0.165241	0.4199
ENSSSCG00000028228	ENSMUSG00000020290	0.0045	0.4976	0.00904341	0.1533
ENSSSCG00000017165	ENSMUSG00000033909	0.2034	1.1658	0.174472	0.5863
ENSSSCG00000017935	ENSMUSG00000018559	0.0081	0.4793	0.0168996	0.14775
ENSSSCG00000004757	ENSMUSG00000034216	0.0223	0.9695	0.0230015	0.50705
ENSSSCG00000007422	ENSMUSG00000017299	0.0181	0.4757	0.0380492	0.15595
ENSSSCG00000010676	ENSMUSG00000033417	0.0642	0.6013	0.106769	0.36485
ENSSSCG00000022534	ENSMUSG00000049606	0.1043	0.6312	0.165241	0.4199
ENSSSCG00000021698	ENSMUSG00000058392	0.3627	1.225	0.296082	0.7752
ENSSSCG00000013404	ENSMUSG00000034173	0.6592	67.7692	0.00972713	34.5438
ENSSSCG00000015827	ENSMUSG00000031483	0.0117	0.6654	0.0175834	0.3444
ENSSSCG00000022164	ENSMUSG00000002076	0.1527	1.3407	0.113896	0.42305
ENSSSCG00000010508	ENSMUSG00000025016	0.0113	0.3745	0.0301736	0.19855
ENSSSCG00000011233	ENSMUSG00000032435	0.0637	0.7611	0.0836947	0.44425
ENSSSCG00000005918	ENSMUSG00000022555	0.0955	1.0729	0.0890111	0.53195
ENSSSCG00000011955	ENSMUSG00000071533	0.0183	0.2854	0.0641205	0.161
ENSSSCG00000002431	ENSMUSG00000021177	0.1155	0.7672	0.150547	0.4991
ENSSSCG00000028049	ENSMUSG00000024622	0.0913	1.5499	0.058907	0.46625
ENSSSCG00000004042	ENSMUSG00000023830	0.1122	1.747	0.0642244	0.7857
ENSSSCG00000001038	ENSMUSG00000021361	0.0683	0.5463	0.125023	0.34145
ENSSSCG00000021495	ENSMUSG00000048581	0.1472	0.6063	0.242784	0.45035
ENSSSCG00000015934	ENSMUSG00000042133	0.0354	0.5465	0.0647758	0.30865
ENSSSCG00000006873	ENSMUSG00000033386	0.1673	0.668	0.250449	0.5013
ENSSSCG00000024254	ENSMUSG00000002661	0.0933	0.9672	0.096464	0.5769
ENSSSCG00000004043	ENSMUSG00000023830	0.1868	2.0723	0.0901414	1.22295
ENSSSCG00000013978	ENSMUSG00000049755	0.1685	1.4934	0.11283	0.7152
ENSSSCG00000013082	ENSMUSG00000024668	0.0716	0.5761	0.124284	0.35965
ENSSSCG00000008382	ENSMUSG00000056342	0.0209	0.4799	0.0435507	0.16085
ENSSSCG00000020790	ENSMUSG00000073616	0	0	0	0
ENSSSCG00000008750	ENSMUSG00000029089	0.0865	0.72	0.120139	0.4465
ENSSSCG00000002760	ENSMUSG00000031917	0.0127	1.0073	0.012608	0.51635
ENSSSCG00000026017	ENSMUSG00000041057	0.1461	0.5225	0.279617	0.40735
ENSSSCG00000003849	ENSMUSG00000028609	0	0	0	0
ENSSSCG00000009826	ENSMUSG00000038593	0.1856	0.7941	0.233724	0.58265
ENSSSCG00000013582	ENSMUSG00000019470	0.0066	1.2405	0.00532044	0.52685
ENSSSCG00000021399	ENSMUSG00000063954	0	0	0	0
ENSSSCG00000026705	ENSMUSG00000026516	0.1905	0.5994	0.317818	0.4902
ENSSSCG00000006519	ENSMUSG00000068917	0.0161	0.4002	0.0402299	0.1162
ENSSSCG00000028504	ENSMUSG00000023104	0.0165	0.8887	0.0185664	0.46085
ENSSSCG00000013468	ENSMUSG00000004929	0.0493	1.6962	0.029065	0.4974
ENSSSCG00000004762	ENSMUSG00000034278	0.0584	0.4772	0.122381	0.197
ENSSSCG00000012578	ENSMUSG00000055681	0.0428	1.3963	0.0306524	0.54095
ENSSSCG00000026077	ENSMUSG00000030763	0.1428	0.8428	0.169435	0.5642
ENSSSCG00000015195	ENSMUSG00000011114	0.1099	0.3675	0.299048	0.19365
ENSSSCG00000012564	ENSMUSG00000000266	0.0026	0.3594	0.00723428	0.1823
ENSSSCG00000017936	ENSMUSG00000018567	0	0	0	0
ENSSSCG00000005062	ENSMUSG00000036339	0.092	0.5217	0.176347	0.35285
ENSSSCG00000011623	ENSMUSG00000002871	0.0477	1.1623	0.0410393	0.52885
ENSSSCG00000023331	ENSMUSG00000093844	0.0119	1.3175	0.00903226	0.57065
ENSSSCG00000005366	ENSMUSG00000028330	0.0152	0.5466	0.0278083	0.1885
ENSSSCG00000004764	ENSMUSG00000046814	0.0168	0.5937	0.0282971	0.31365
ENSSSCG00000010821	ENSMUSG00000026615	0.1024	0.727	0.140853	0.4659
ENSSSCG00000007646	ENSMUSG00000050552	0.0153	0.7112	0.0215129	0.3709
ENSSSCG00000014427	ENSMUSG00000042211	0.0517	0.7803	0.0662566	0.44185
ENSSSCG00000011746	ENSMUSG00000027660	0.0657	0.7101	0.0925222	0.42075
ENSSSCG00000005171	ENSMUSG00000028494	0.1181	0.7008	0.168522	0.4685
ENSSSCG00000008536	ENSMUSG00000041057	0.1693	0.8592	0.197044	0.5989
ENSSSCG00000010620	ENSMUSG00000025027	0.0395	0.5631	0.0701474	0.32105
ENSSSCG00000029627	ENSMUSG00000032834	0.106	1.4642	0.0723945	0.4381
ENSSSCG00000011956	ENSMUSG00000044763	0.1467	0.5981	0.245277	0.44575
ENSSSCG00000015430	ENSMUSG00000028999	0.0755	0.607	0.124382	0.379
ENSSSCG00000005460	ENSMUSG00000070972	0.1241	0.9688	0.128097	0.5085
ENSSSCG00000010669	ENSMUSG00000074746	0.0737	0.4479	0.164546	0.19765
ENSSSCG00000004610	ENSMUSG00000034563	0.1827	0.877	0.208324	0.5212
ENSSSCG00000022048	ENSMUSG00000005873	0.0541	0.6493	0.0833205	0.37875
ENSSSCG00000015112	ENSMUSG00000032119	0.0746	0.5253	0.142014	0.33725
ENSSSCG00000009814	ENSMUSG00000029472	0.0305	0.4653	0.0655491	0.16315
ENSSSCG00000024046	ENSMUSG00000079469	0.1865	0.769	0.242523	0.571
ENSSSCG00000000164	ENSMUSG00000020038	0.0196	0.5456	0.0359238	0.1924
ENSSSCG00000016680	ENSMUSG00000058446	0.0192	0.4162	0.0461317	0.1273
ENSSSCG00000005917	ENSMUSG00000022556	0.0876	1.0166	0.0861696	0.5959
ENSSSCG00000001824	ENSMUSG00000034430	0.2059	0.9395	0.219159	0.57565
ENSSSCG00000014791	ENSMUSG00000030978	0.1538	0.914	0.168271	0.5108
ENSSSCG00000003830	ENSMUSG00000062627	0.1142	0.4266	0.267698	0.3275
ENSSSCG00000013748	ENSMUSG00000033751	0.168	1.1024	0.152395	0.5192
ENSSSCG00000025900	ENSMUSG00000013646	0.0324	0.898	0.0360802	0.4814
ENSSSCG00000011491	ENSMUSG00000053453	0.0106	0.563	0.0188277	0.1921
ENSSSCG00000023949	ENSMUSG00000035828	0.0087	1.1976	0.00726453	0.5075
ENSSSCG00000025571	ENSMUSG00000071662	0	0	0	0
ENSSSCG00000007984	ENSMUSG00000024181	0.1023	1.2903	0.0792839	0.54745
ENSSSCG00000001347	ENSMUSG00000039220	0.0237	0.6395	0.0370602	0.34345
ENSSSCG00000024748	ENSMUSG00000030942	0.0811	0.5156	0.157292	0.3389
ENSSSCG00000004772	ENSMUSG00000040007	0.0557	0.5175	0.107633	0.31445
ENSSSCG00000022612	ENSMUSG00000048000	0.0292	0.6045	0.0483044	0.33145
ENSSSCG00000024983	ENSMUSG00000032215	0.0101	1.1022	0.00916349	0.5612
ENSSSCG00000005370	ENSMUSG00000028331	0.2325	0.764	0.304319	0.5145
ENSSSCG00000021791	ENSMUSG00000052917	0.1938	0.4619	0.419571	0.42475
ENSSSCG00000010316	ENSMUSG00000021767	0.0517	0.4404	0.117393	0.1719
ENSSSCG00000029262	ENSMUSG00000010392	0.0145	0.5591	0.0259345	0.19405
ENSSSCG00000024240	ENSMUSG00000041375	0.1489	1.1728	0.126961	0.5353
ENSSSCG00000010114	ENSMUSG00000003527	0.0444	0.7887	0.0562952	0.43875
ENSSSCG00000010876	ENSMUSG00000026502	0.0171	0.6185	0.0276475	0.32635
ENSSSCG00000009259	ENSMUSG00000055725	0.0137	0.5865	0.0233589	0.30695
ENSSSCG00000015432	ENSMUSG00000020564	0.0825	0.3402	0.242504	0.1526
ENSSSCG00000030220	ENSMUSG00000015961	0.0452	0.4024	0.112326	0.1464
ENSSSCG00000026569	ENSMUSG00000068663	0.1297	0.9826	0.131997	0.521
ENSSSCG00000013467	ENSMUSG00000004937	0.0708	1.5952	0.0443831	0.4684
ENSSSCG00000028663	ENSMUSG00000010608	0.0017	0.5383	0.00315809	0.17085
ENSSSCG00000010743	ENSMUSG00000030983	0.1375	0.921	0.149294	0.598
ENSSSCG00000013245	ENSMUSG00000027255	0.0409	0.4751	0.0860871	0.17845
ENSSSCG00000002759	ENSMUSG00000031916	0.0871	0.666	0.130781	0.4201
ENSSSCG00000024636	ENSMUSG00000070939	0.0858	1.2896	0.0665323	0.5306
ENSSSCG00000005373	ENSMUSG00000028334	0.0266	0.6225	0.0427309	0.33785
ENSSSCG00000017167	ENSMUSG00000017132	0.0236	1.0018	0.0235576	0.5245
ENSSSCG00000006029	ENSMUSG00000038736	0.0997	0.4561	0.218592	0.32775
ENSSSCG00000027103	ENSMUSG00000062169	0.0639	0.7132	0.0895962	0.4205
ENSSSCG00000003393	ENSMUSG00000044700	0.0902	0.8976	0.10049	0.539
ENSSSCG00000030053	ENSMUSG00000032096	0.0055	0.3899	0.0141062	0.10045
ENSSSCG00000026934	ENSMUSG00000023791	0.1469	0.4476	0.328195	0.3707
ENSSSCG00000005065	ENSMUSG00000036291	0.0944	0.481	0.196258	0.3349
ENSSSCG00000011454	ENSMUSG00000006527	0.0758	0.547	0.138574	0.3493
ENSSSCG00000026897	ENSMUSG00000019814	0.1653	1.1669	0.141657	0.54875
ENSSSCG00000017937	ENSMUSG00000018572	0.045	0.4224	0.106534	0.1562
ENSSSCG00000026194	ENSMUSG00000038544	0.0219	0.4872	0.0449507	0.1655
ENSSSCG00000029402	ENSMUSG00000029290	0.05	0.6704	0.0745823	0.3852
ENSSSCG00000002846	ENSMUSG00000031701	0.0045	0.4101	0.0109729	0.10955
ENSSSCG00000029702	ENSMUSG00000009549	0.0281	0.9207	0.0305203	0.48845
ENSSSCG00000004456	ENSMUSG00000056131	0.1029	0.7334	0.140305	0.4696
ENSSSCG00000011725	ENSMUSG00000027823	0.0045	0.449	0.0100223	0.129
ENSSSCG00000021729	ENSMUSG00000014402	0.0613	0.484	0.126653	0.3033
ENSSSCG00000006301	ENSMUSG00000040843	0.0171	0.4874	0.0350841	0.1608
ENSSSCG00000006520	ENSMUSG00000028049	0.0581	0.5259	0.110477	0.32105
ENSSSCG00000005174	ENSMUSG00000070934	0	0	0	0
ENSSSCG00000003566	ENSMUSG00000028851	0.0249	0.8392	0.0296711	0.4445
ENSSSCG00000014811	ENSMUSG00000032737	0.0288	0.8988	0.0320427	0.4782
ENSSSCG00000004884	ENSMUSG00000024614	0.0479	0.4825	0.0992746	0.18915
ENSSSCG00000025949	ENSMUSG00000005881	0.0149	0.6918	0.021538	0.3608
ENSSSCG00000011282	ENSMUSG00000061536	0.1107	0.5459	0.202784	0.38365
ENSSSCG00000002433	ENSMUSG00000021178	0	0	0	0
ENSSSCG00000014955	ENSMUSG00000031928	0.0823	0.8315	0.0989778	0.49805
ENSSSCG00000008756	ENSMUSG00000029169	0.0017	0.3508	0.00484607	0.1771
ENSSSCG00000028491	ENSMUSG00000026511	0.0435	0.4467	0.0973808	0.16685
ENSSSCG00000000543	ENSMUSG00000030301	0.1774	6.7963	0.0261024	3.57555
ENSSSCG00000023373	ENSMUSG00000020526	0.1103	0.8223	0.134136	0.52145
ENSSSCG00000004140	ENSMUSG00000019868	0.1023	0.6557	0.156016	0.43015
ENSSSCG00000016170	ENSMUSG00000026196	0.2049	0.5829	0.351518	0.49635
ENSSSCG00000021213	ENSMUSG00000021072	0.1328	0.5148	0.257964	0.3902
ENSSSCG00000029236	ENSMUSG00000035011	0.0603	1.7918	0.0336533	0.7562
ENSSSCG00000000005	ENSMUSG00000064284	0.1474	0.6521	0.226039	0.47345
ENSSSCG00000002640	ENSMUSG00000001482	0.0504	1.1239	0.0448438	0.51235
ENSSSCG00000010511	ENSMUSG00000025019	0.011	0.1006	0.109344	0.0613
ENSSSCG00000016682	ENSMUSG00000005225	0.0652	0.5597	0.116491	0.34505
ENSSSCG00000013771	ENSMUSG00000005469	0.0099	0.5905	0.0167655	0.30515
ENSSSCG00000029999	ENSMUSG00000010290	0.1198	0.785	0.152611	0.5123
ENSSSCG00000015576	ENSMUSG00000006005	0.0298	0.6983	0.0426751	0.37895
ENSSSCG00000013600	ENSMUSG00000077450	0.004	0.6379	0.00627058	0.32295
ENSSSCG00000012603	ENSMUSG00000031095	0.0495	0.5047	0.0980781	0.30185
ENSSSCG00000023174	ENSMUSG00000039701	0.1567	0.7809	0.200666	0.54715
ENSSSCG00000024500	ENSMUSG00000020284	0.1592	1.7445	0.0912582	1.03145
ENSSSCG00000000508	ENSMUSG00000034163	0.0742	0.4471	0.165958	0.19775
ENSSSCG00000009320	ENSMUSG00000029648	0.1183	0.9179	0.128881	0.57725
ENSSSCG00000011252	ENSMUSG00000036737	0.0451	0.7208	0.0625694	0.4055
ENSSSCG00000012489	ENSMUSG00000067369	0.1639	0.5679	0.288607	0.44785
ENSSSCG00000003976	ENSMUSG00000032897	0.0074	0.3716	0.0199139	0.1932
ENSSSCG00000027449	ENSMUSG00000038074	0.0419	0.4874	0.0859664	0.1856
ENSSSCG00000013308	ENSMUSG00000027180	0.0299	0.5644	0.0529766	0.3121
ENSSSCG00000030231	ENSMUSG00000052752	0.0093	1.8139	0.00512707	0.71625
ENSSSCG00000016985	ENSMUSG00000024191	0.0267	0.6768	0.0394504	0.3651
ENSSSCG00000007425	ENSMUSG00000050373	0.0358	0.747	0.047925	0.4093
ENSSSCG00000021746	ENSMUSG00000052962	0.1386	0.644	0.215217	0.4606
ENSSSCG00000011593	ENSMUSG00000030126	0.0158	0.5112	0.0309077	0.1714
ENSSSCG00000016760	ENSMUSG00000039182	0.0425	0.538	0.0789963	0.3115
ENSSSCG00000004238	ENSMUSG00000019878	0.038	0.4551	0.0834981	0.16555
ENSSSCG00000030425	ENSMUSG00000057342	0.0942	0.6891	0.1367	0.43875
ENSSSCG00000021270	ENSMUSG00000020137	0.0702	0.3123	0.224784	0.12635
ENSSSCG00000016762	ENSMUSG00000021318	0.0369	1.0099	0.0365383	0.54185
ENSSSCG00000022066	ENSMUSG00000004934	0.0448	1.5813	0.0283311	0.43545
ENSSSCG00000024123	ENSMUSG00000066149	0.1584	0.5735	0.276199	0.44515
ENSSSCG00000006302	ENSMUSG00000040836	0.0465	0.63	0.0738095	0.3615
ENSSSCG00000024648	ENSMUSG00000066148	0.0046	0.3922	0.0117287	0.1007
ENSSSCG00000007426	ENSMUSG00000017307	0.0823	0.6352	0.129565	0.3999
ENSSSCG00000008980	ENSMUSG00000029426	0.0916	0.6228	0.147078	0.403
ENSSSCG00000017506	ENSMUSG00000020883	0.0011	0.3538	0.0031091	0.178
ENSSSCG00000013312	ENSMUSG00000027177	0.0519	0.4075	0.127362	0.15565
ENSSSCG00000011677	ENSMUSG00000041440	0.129	0.5951	0.21677	0.42655
ENSSSCG00000000119	ENSMUSG00000033047	0.0044	0.9597	0.00458477	0.48425
ENSSSCG00000001992	ENSMUSG00000040472	0.0505	0.6391	0.0790174	0.37005
ENSSSCG00000029810	ENSMUSG00000014550	0.1059	0.5923	0.178795	0.40205
ENSSSCG00000015712	ENSMUSG00000001674	0.1153	0.8068	0.14291	0.5187
ENSSSCG00000002758	ENSMUSG00000078931	0.1048	1.1301	0.0927352	0.56985
ENSSSCG00000027211	ENSMUSG00000069495	0.018	0.2222	0.0810081	0.1291
ENSSSCG00000024827	ENSMUSG00000030083	0.0723	1.1726	0.0616579	0.5586
ENSSSCG00000015667	ENSMUSG00000036792	0.0341	0.183	0.186339	0.1256
ENSSSCG00000017310	ENSMUSG00000018412	0.0442	0.324	0.13642	0.1062
ENSSSCG00000003114	ENSMUSG00000006019	0.0984	0.9512	0.103448	0.574
ENSSSCG00000026488	ENSMUSG00000021774	0.0497	0.4454	0.111585	0.1724
ENSSSCG00000027711	ENSMUSG00000032526	0.0624	0.8211	0.0759956	0.47295
ENSSSCG00000029517	ENSMUSG00000022828	0.0419	0.5198	0.0806079	0.3018
ENSSSCG00000000426	ENSMUSG00000025402	0.0266	0.5049	0.0526837	0.17905
ENSSSCG00000009774	ENSMUSG00000047635	0.2213	0.9125	0.242521	0.57755
ENSSSCG00000023001	ENSMUSG00000045790	0.1551	1.0537	0.147196	0.58195
ENSSSCG00000014900	ENSMUSG00000030643	0.0038	0.4777	0.00795478	0.14265
ENSSSCG00000005064	ENSMUSG00000036282	0.1003	0.3347	0.299671	0.16765
ENSSSCG00000008478	ENSMUSG00000024241	0.0252	0.5031	0.0500894	0.17675
ENSSSCG00000025852	ENSMUSG00000034751	0.1466	0.7916	0.185195	0.5424
ENSSSCG00000016768	ENSMUSG00000094649	0.1081	0.233	0.463948	0.1246
ENSSSCG00000015668	ENSMUSG00000026761	0.0591	0.4965	0.119033	0.30735
ENSSSCG00000016098	ENSMUSG00000026037	0.0844	0.3799	0.222164	0.17435
ENSSSCG00000011961	ENSMUSG00000022757	0.0534	0.3985	0.134003	0.15265
ENSSSCG00000016097	ENSMUSG00000026036	0.2294	0.7421	0.309123	0.50045
ENSSSCG00000002434	ENSMUSG00000021179	0.1109	0.7405	0.149764	0.48115
ENSSSCG00000003652	ENSMUSG00000023075	0.0446	0.3283	0.135851	0.10875
ENSSSCG00000016769	ENSMUSG00000041297	0.043	0.5574	0.0771439	0.3217
ENSSSCG00000008538	ENSMUSG00000052525	0.0719	0.3977	0.18079	0.17075
ENSSSCG00000001056	ENSMUSG00000038546	0.0101	0.2928	0.0344945	0.1565
ENSSSCG00000030317	ENSMUSG00000033991	0.1181	0.4463	0.26462	0.34125
ENSSSCG00000016510	ENSMUSG00000038538	0.0512	0.2937	0.174328	0.19805
ENSSSCG00000029094	ENSMUSG00000032571	0.0304	0.8664	0.0350877	0.4636
ENSSSCG00000009732	ENSMUSG00000014668	0.1143	0.8192	0.139526	0.5239
ENSSSCG00000022413	ENSMUSG00000032041	0.1578	0.8914	0.177025	0.5035
ENSSSCG00000004785	ENSMUSG00000009549	0.0281	0.9207	0.0305203	0.48845
ENSSSCG00000006522	ENSMUSG00000028048	0.0799	0.702	0.113818	0.4309
ENSSSCG00000003091	ENSMUSG00000044030	0.0228	0.6561	0.0347508	0.35085
ENSSSCG00000005383	ENSMUSG00000039740	0.1267	0.6672	0.189898	0.4603
ENSSSCG00000017388	ENSMUSG00000017188	0.0556	0.5831	0.0953524	0.34715
ENSSSCG00000013083	ENSMUSG00000034820	0.0042	0.2736	0.0153509	0.141
ENSSSCG00000022119	ENSMUSG00000026721	0.0869	0.6837	0.127103	0.42875
ENSSSCG00000001517	ENSMUSG00000048731	0.4073	0.9195	0.442958	0.46705
ENSSSCG00000008040	ENSMUSG00000002496	0.0476	1.0257	0.0464073	0.56045
ENSSSCG00000010027	ENSMUSG00000020453	0.0077	0.5803	0.013269	0.19785
ENSSSCG00000021799	ENSMUSG00000050954	0.4265	1.4642	0.291285	1.1586
ENSSSCG00000011569	ENSMUSG00000056952	0.1877	0.8533	0.21997	0.51435
ENSSSCG00000007427	ENSMUSG00000045822	0.1208	0.6267	0.192756	0.43415
ENSSSCG00000008637	ENSMUSG00000059669	0.248	0.8433	0.294083	0.56965
ENSSSCG00000003596	ENSMUSG00000074088	0.0079	0.6183	0.012777	0.31705
ENSSSCG00000009620	ENSMUSG00000022098	0.0174	0.7261	0.0239636	0.38045
ENSSSCG00000029192	ENSMUSG00000040913	0.0126	0.5453	0.0231065	0.18525
ENSSSCG00000003699	ENSMUSG00000042942	0.056	0.5163	0.108464	0.31415
ENSSSCG00000016834	ENSMUSG00000039704	0.0267	0.5317	0.0502163	0.19255
ENSSSCG00000005901	ENSMUSG00000033819	0.1151	1.2377	0.0929951	0.53395
ENSSSCG00000009113	ENSMUSG00000028114	0.0069	0.5913	0.0116692	0.30255
ENSSSCG00000029594	ENSMUSG00000047731	0.082	0.5421	0.151264	0.35305
ENSSSCG00000005386	ENSMUSG00000061455	0.0583	0.4256	0.136983	0.1711
ENSSSCG00000007684	ENSMUSG00000039737	0.0592	0.373	0.158713	0.1457
ENSSSCG00000016017	ENSMUSG00000027006	0.0619	0.6577	0.0941159	0.39075
ENSSSCG00000015504	ENSMUSG00000014226	0.0274	0.6248	0.043854	0.3398
ENSSSCG00000009971	ENSMUSG00000041961	0.1109	0.8224	0.134849	0.5221
ENSSSCG00000017418	ENSMUSG00000017837	0.0043	0.6949	0.00618794	0.35175
ENSSSCG00000015714	ENSMUSG00000026339	0.0536	0.6901	0.0776699	0.39865
ENSSSCG00000005387	ENSMUSG00000028343	0.1045	0.7373	0.141733	0.47315
ENSSSCG00000003461	ENSMUSG00000078515	0.3296	0.4927	0.668967	0.57595
ENSSSCG00000006544	ENSMUSG00000042572	0.0033	0.2405	0.0137214	0.12355
ENSSSCG00000023680	ENSMUSG00000029726	0.0513	0.3813	0.13454	0.14195
ENSSSCG00000010680	ENSMUSG00000024993	0.0549	0.5153	0.10654	0.31255
ENSSSCG00000025151	ENSMUSG00000031913	0.0085	0.6207	0.0136942	0.31885
ENSSSCG00000029776	ENSMUSG00000032305	0.0949	0.5572	0.170316	0.3735
ENSSSCG00000002723	ENSMUSG00000031960	0.0594	0.7432	0.0799247	0.431
ENSSSCG00000017560	ENSMUSG00000020864	0.0399	0.4127	0.0966804	0.14625
ENSSSCG00000017419	ENSMUSG00000014195	0.0164	0.4827	0.0339756	0.15775
ENSSSCG00000007270	ENSMUSG00000059842	0.0903	0.683	0.132211	0.4318
ENSSSCG00000015669	ENSMUSG00000052155	0.0053	0.3016	0.0175729	0.1561
ENSSSCG00000008479	ENSMUSG00000035051	0.1211	0.4967	0.243809	0.36945
ENSSSCG00000005388	ENSMUSG00000028344	0.157	0.6268	0.250479	0.4704
ENSSSCG00000022902	ENSMUSG00000035354	0.1399	1.1848	0.118079	0.5323
ENSSSCG00000011284	ENSMUSG00000032525	0.1311	0.6532	0.200704	0.4577
ENSSSCG00000001966	ENSMUSG00000035133	0.0149	0.3641	0.0409228	0.19695
ENSSSCG00000002952	ENSMUSG00000030588	0.0557	0.8115	0.0686383	0.46145
ENSSSCG00000015936	ENSMUSG00000027088	0.1155	0.4736	0.243877	0.3523
ENSSSCG00000029519	ENSMUSG00000031781	0.1036	0.6796	0.152443	0.4434
ENSSSCG00000007428	ENSMUSG00000017764	0.111	0.8877	0.125042	0.55485
ENSSSCG00000000512	ENSMUSG00000020130	0.0506	0.5497	0.0920502	0.32545
ENSSSCG00000029741	ENSMUSG00000008859	0.0042	0.7241	0.0058003	0.36625
ENSSSCG00000021918	ENSMUSG00000035790	0.0866	0.7028	0.123221	0.438
ENSSSCG00000026230	ENSMUSG00000014504	0.0222	0.5573	0.0398349	0.30085
ENSSSCG00000003850	ENSMUSG00000028608	0.0286	0.4761	0.0600714	0.16665
ENSSSCG00000028738	ENSMUSG00000050954	0.4265	1.4642	0.291285	1.1586
ENSSSCG00000009781	ENSMUSG00000029406	0.0489	0.8489	0.057604	0.47335
ENSSSCG00000029274	ENSMUSG00000053799	0.1132	0.4742	0.238718	0.3503
ENSSSCG00000003653	ENSMUSG00000028648	0.1639	1.1916	0.137546	0.5597
ENSSSCG00000011845	ENSMUSG00000005615	0.0275	0.4552	0.060413	0.1551
ENSSSCG00000008540	ENSMUSG00000014956	0.003	0.3416	0.0087822	0.1738
ENSSSCG00000003100	ENSMUSG00000074358	0.078	0.7856	0.0992872	0.4708
ENSSSCG00000016835	ENSMUSG00000054115	0.0781	0.6187	0.126232	0.38745
ENSSSCG00000010351	ENSMUSG00000058690	0.0732	0.4239	0.172682	0.18515
ENSSSCG00000005920	ENSMUSG00000022557	0.0662	1.0914	0.060656	0.5119
ENSSSCG00000030405	ENSMUSG00000024241	0.0417	0.5427	0.076838	0.31305
ENSSSCG00000007433	ENSMUSG00000039849	0.0214	0.5168	0.0414087	0.1798
ENSSSCG00000000165	ENSMUSG00000049038	0.1501	0.602	0.249336	0.4511
ENSSSCG00000005072	ENSMUSG00000060073	0.0035	0.4402	0.00795093	0.1236
ENSSSCG00000006667	ENSMUSG00000015943	0.1228	0.8299	0.14797	0.53775
ENSSSCG00000000004	ENSMUSG00000052496	0.3184	2.2367	0.142353	1.43675
ENSSSCG00000006619	ENSMUSG00000028136	0.0034	0.2772	0.0122655	0.142
ENSSSCG00000025820	ENSMUSG00000029416	0.0736	0.9055	0.0812811	0.52635
ENSSSCG00000014269	ENSMUSG00000035992	0.0603	0.406	0.148522	0.1633
ENSSSCG00000001968	ENSMUSG00000035142	0.2183	1.1303	0.193135	0.58345
ENSSSCG00000029300	ENSMUSG00000039754	0.1019	1.7084	0.0596465	0.7561
ENSSSCG00000022171	ENSMUSG00000035142	0.1155	0.4226	0.273308	0.3268
ENSSSCG00000026784	ENSMUSG00000062075	0.1031	2.3403	0.0440542	1.27325
ENSSSCG00000010029	ENSMUSG00000020457	0.004	0.4394	0.00910332	0.1237
ENSSSCG00000004385	ENSMUSG00000019804	0.0295	0.3347	0.0881386	0.19685
ENSSSCG00000024176	ENSMUSG00000038302	0.1674	0.4563	0.366864	0.39555
ENSSSCG00000008482	ENSMUSG00000055760	0.0946	0.4203	0.225077	0.30475
ENSSSCG00000030497	ENSMUSG00000075054	0.2293	0.53	0.432642	0.4943
ENSSSCG00000006756	ENSMUSG00000005687	0.0083	0.7677	0.0108115	0.39215
ENSSSCG00000009782	ENSMUSG00000029404	0.0682	0.6962	0.0979604	0.4163
ENSSSCG00000000120	ENSMUSG00000033055	0.0383	0.7584	0.0505011	0.4175
ENSSSCG00000029679	ENSMUSG00000049299	0.0061	0.6158	0.00990581	0.314
ENSSSCG00000027537	ENSMUSG00000021830	0.1365	0.572	0.238636	0.4225
ENSSSCG00000013176	ENSMUSG00000050043	0.0515	0.5958	0.0864384	0.3494
ENSSSCG00000021744	ENSMUSG00000022362	0.2838	1.0057	0.282192	0.58665
ENSSSCG00000026617	ENSMUSG00000074656	0.0115	0.2984	0.0385389	0.1607
ENSSSCG00000010514	ENSMUSG00000035049	0.0524	0.8226	0.0637005	0.4637
ENSSSCG00000000579	ENSMUSG00000030245	0.0078	0.5938	0.0131357	0.3047
ENSSSCG00000013534	ENSMUSG00000024212	0.0712	1.0415	0.0683629	0.59195
ENSSSCG00000022579	ENSMUSG00000037519	0.1113	2.0383	0.0546043	1.13045
ENSSSCG00000022123	ENSMUSG00000037519	0.1331	1.0341	0.128711	0.55015
ENSSSCG00000011572	ENSMUSG00000030298	0.0342	0.7487	0.0456792	0.40855
ENSSSCG00000014239	ENSMUSG00000048799	0.0581	0.6871	0.0845583	0.40165
ENSSSCG00000007432	ENSMUSG00000039834	0.0671	0.7873	0.085228	0.46075
ENSSSCG00000029343	ENSMUSG00000020818	0.0328	0.58	0.0565517	0.3228
ENSSSCG00000003570	ENSMUSG00000037622	0.0138	0.5346	0.0258137	0.1811
ENSSSCG00000024880	ENSMUSG00000021629	0.0237	0.4858	0.0487855	0.1666
ENSSSCG00000017553	ENSMUSG00000038909	0.0015	0.4875	0.00307692	0.14525
ENSSSCG00000023960	ENSMUSG00000023977	0.1397	0.7953	0.175657	0.53735
ENSSSCG00000028582	ENSMUSG00000014550	0.093	0.8247	0.112768	0.50535
ENSSSCG00000028757	ENSMUSG00000039634	0.0307	0.5818	0.0527673	0.3216
ENSSSCG00000029841	ENSMUSG00000028799	0.474	67.7359	0.00699777	34.3419
ENSSSCG00000000167	ENSMUSG00000035620	0.01	0.197	0.0507614	0.1085
ENSSSCG00000010016	ENSMUSG00000034543	0.0509	0.5826	0.087367	0.3422
ENSSSCG00000001646	ENSMUSG00000036568	0.073	0.5032	0.145072	0.3246
ENSSSCG00000023130	ENSMUSG00000044475	0.1538	0.8795	0.174872	0.59355
ENSSSCG00000014331	ENSMUSG00000038773	0.0372	0.3877	0.0959505	0.13105
ENSSSCG00000023660	ENSMUSG00000026496	0.0402	0.8458	0.047529	0.4631
ENSSSCG00000011594	ENSMUSG00000005893	0.0056	0.4317	0.012972	0.12145
ENSSSCG00000002408	ENSMUSG00000021044	0.0587	1.0301	0.0569848	0.57375
ENSSSCG00000024253	ENSMUSG00000005698	0.0056	0.4341	0.0129003	0.12265
ENSSSCG00000024907	ENSMUSG00000074211	0.1514	1.2388	0.122215	0.5708
ENSSSCG00000003146	ENSMUSG00000108927	0.2157	1.0282	0.209784	0.5298
ENSSSCG00000017674	ENSMUSG00000034297	0.0141	0.3138	0.0449331	0.171
ENSSSCG00000004624	ENSMUSG00000042688	0.0254	0.6011	0.0422559	0.32595
ENSSSCG00000013913	ENSMUSG00000055707	0.0649	1.5407	0.0421237	0.43525
ENSSSCG00000007782	ENSMUSG00000042308	0.0445	0.6577	0.06766	0.37335
ENSSSCG00000008640	ENSMUSG00000062054	0.1514	0.6986	0.216719	0.5007
ENSSSCG00000016772	ENSMUSG00000041236	0.0268	1.0147	0.0264117	0.53415
ENSSSCG00000020698	ENSMUSG00000026499	0.1023	0.4105	0.249208	0.30755
ENSSSCG00000013367	ENSMUSG00000006599	0.0162	0.4484	0.0361285	0.1404
ENSSSCG00000005399	ENSMUSG00000028309	0.0138	0.6145	0.0224573	0.32105
ENSSSCG00000014989	ENSMUSG00000032002	0.0187	0.2819	0.0663356	0.15965
ENSSSCG00000001204	ENSMUSG00000021327	0.1972	0.6066	0.325091	0.5005
ENSSSCG00000004625	ENSMUSG00000042487	0.0346	1.0796	0.0320489	0.5744
ENSSSCG00000022838	ENSMUSG00000074093	0.1371	2.2082	0.0620868	1.2412
ENSSSCG00000013085	ENSMUSG00000024666	0.0321	0.7709	0.0416396	0.41755
ENSSSCG00000001536	ENSMUSG00000038677	0.0275	0.6895	0.039884	0.37225
ENSSSCG00000029145	ENSMUSG00000028700	0.0081	0.5629	0.0143898	0.18955
ENSSSCG00000030486	ENSMUSG00000022749	0.0419	0.6085	0.0688578	0.34615
ENSSSCG00000026424	ENSMUSG00000062376	0.014	0.5971	0.0234467	0.31255
ENSSSCG00000013063	ENSMUSG00000071645	0.1315	0.5328	0.246809	0.3979
ENSSSCG00000007301	ENSMUSG00000038241	0.1143	0.6603	0.173103	0.44445
ENSSSCG00000007046	ENSMUSG00000037376	0.0864	0.5316	0.162528	0.3522
ENSSSCG00000014327	ENSMUSG00000003778	0.0305	0.3804	0.0801788	0.1207
ENSSSCG00000011068	ENSMUSG00000020481	1.467	4.0073	0.366082	3.47065
ENSSSCG00000029099	ENSMUSG00000005881	0.0149	0.6918	0.021538	0.3608
ENSSSCG00000022430	ENSMUSG00000021629	0.0319	0.4538	0.0702953	0.1588
ENSSSCG00000026663	ENSMUSG00000020956	0.0773	0.9017	0.085727	0.52815
ENSSSCG00000005038	ENSMUSG00000021832	0	0	0	0
ENSSSCG00000002390	ENSMUSG00000021257	0.0477	0.4679	0.101945	0.18165
ENSSSCG00000004895	ENSMUSG00000057329	0.0972	0.5361	0.181309	0.36525
ENSSSCG00000013011	ENSMUSG00000024790	0.1751	1.2283	0.142555	0.58925
ENSSSCG00000001970	ENSMUSG00000035181	0.0779	0.6356	0.122561	0.3957
ENSSSCG00000002854	ENSMUSG00000030423	0.0936	0.6645	0.140858	0.42585
ENSSSCG00000000093	ENSMUSG00000022420	0.0037	0.724	0.0051105	0.3657
ENSSSCG00000028390	ENSMUSG00000022749	0.0738	0.8536	0.0864574	0.5006
ENSSSCG00000010569	ENSMUSG00000025220	0.0142	0.4313	0.0329237	0.12985
ENSSSCG00000004247	ENSMUSG00000019857	0.0043	0.3071	0.014002	0.15785
ENSSSCG00000022757	ENSMUSG00000020219	0.0298	0.6949	0.0428839	0.37725
ENSSSCG00000017391	ENSMUSG00000035172	0.045	0.5285	0.0851466	0.30925
ENSSSCG00000028831	ENSMUSG00000056342	0.0177	0.8119	0.0218007	0.42365
ENSSSCG00000022904	ENSMUSG00000026245	0.0686	0.5741	0.119491	0.35565
ENSSSCG00000022316	ENSMUSG00000107169	0.054	1.6354	0.0330194	0.4717
ENSSSCG00000026472	ENSMUSG00000063888	0.1212	0.5775	0.20987	0.40995
ENSSSCG00000009663	ENSMUSG00000022043	0.1068	1.3297	0.0803189	0.57165
ENSSSCG00000001005	ENSMUSG00000071451	0.0539	1.1216	0.0480563	0.5147
ENSSSCG00000009733	ENSMUSG00000029502	0.1237	1.1964	0.103394	0.5219
ENSSSCG00000008542	ENSMUSG00000052139	0.1153	0.6306	0.182842	0.4306
ENSSSCG00000015441	ENSMUSG00000035933	0.1017	0.6548	0.155315	0.4291
ENSSSCG00000007986	ENSMUSG00000024177	0.1274	1.2887	0.0988593	0.57175
ENSSSCG00000027687	ENSMUSG00000028960	0.0249	0.9996	0.02491	0.5247
ENSSSCG00000009119	ENSMUSG00000027968	0.1259	1.2601	0.0999127	0.55595
ENSSSCG00000006665	ENSMUSG00000068856	0.0025	0.427	0.0058548	0.116
ENSSSCG00000017968	ENSMUSG00000032782	0.0965	0.6904	0.139774	0.4417
ENSSSCG00000028826	ENSMUSG00000028772	0.0208	0.364	0.0571429	0.1028
ENSSSCG00000023193	ENSMUSG00000035933	0.1231	0.4402	0.279646	0.3432
ENSSSCG00000021961	ENSMUSG00000022752	0.1175	0.6825	0.172161	0.45875
ENSSSCG00000028973	ENSMUSG00000066042	0.0043	0.6155	0.00698619	0.31205
ENSSSCG00000026590	ENSMUSG00000022554	0.1583	0.9596	0.164965	0.5381
ENSSSCG00000004390	ENSMUSG00000038332	0.0259	0.5388	0.0480698	0.1953
ENSSSCG00000017673	ENSMUSG00000018068	0.0225	0.5392	0.0417285	0.1921
ENSSSCG00000008387	ENSMUSG00000020283	0.0423	0.3756	0.11262	0.1301
ENSSSCG00000009569	ENSMUSG00000021938	0.0194	0.4221	0.0459607	0.13045
ENSSSCG00000003211	ENSMUSG00000060601	0.0611	1.1796	0.0517972	0.5509
ENSSSCG00000002392	ENSMUSG00000034168	0.0114	0.7306	0.0156036	0.3767
ENSSSCG00000004792	ENSMUSG00000027349	0.0451	0.5413	0.0833179	0.31575
ENSSSCG00000003621	ENSMUSG00000061894	0.1644	0.7359	0.2234	0.53235
ENSSSCG00000023307	ENSMUSG00000020271	0.0073	0.3432	0.0212704	0.1789
ENSSSCG00000009692	ENSMUSG00000021958	0.1959	0.7592	0.258035	0.5755
ENSSSCG00000025675	ENSMUSG00000034994	0.004	1.2414	0.00322217	0.5247
ENSSSCG00000022709	ENSMUSG00000028030	0.0693	0.4251	0.16302	0.18185
ENSSSCG00000008549	ENSMUSG00000029141	0.1161	0.6335	0.183268	0.43285
ENSSSCG00000009783	ENSMUSG00000023707	0.0905	0.8835	0.102434	0.53225
ENSSSCG00000013038	ENSMUSG00000024963	0.1661	0.5747	0.28902	0.45345
ENSSSCG00000016300	ENSMUSG00000026289	0.0529	0.6925	0.0763899	0.39915
ENSSSCG00000006903	ENSMUSG00000033773	0.2125	0.6542	0.324824	0.5396
ENSSSCG00000022151	ENSMUSG00000050796	0.0771	1.7971	0.0429025	0.77565
ENSSSCG00000028433	ENSMUSG00000020648	0.0933	0.5217	0.178838	0.35415
ENSSSCG00000024168	ENSMUSG00000028029	0.0928	0.7785	0.119204	0.48205
ENSSSCG00000030183	ENSMUSG00000020946	0.0333	0.442	0.0753394	0.1543
ENSSSCG00000029425	ENSMUSG00000024436	0.1456	0.4544	0.320423	0.3728
ENSSSCG00000025308	ENSMUSG00000050222	0.1464	1.484	0.0986523	0.4884
ENSSSCG00000005073	ENSMUSG00000048118	0.0775	0.6916	0.112059	0.4233
ENSSSCG00000003701	ENSMUSG00000002477	0	0	0	0
ENSSSCG00000022869	ENSMUSG00000020650	0.1252	0.6648	0.188327	0.4576
ENSSSCG00000003332	ENSMUSG00000029076	0.104	1.3512	0.0769686	0.5796
ENSSSCG00000027076	ENSMUSG00000053929	0.4981	2.2633	0.220077	1.62975
ENSSSCG00000016207	ENSMUSG00000049339	0.09	0.4406	0.204267	0.3103
ENSSSCG00000030660	ENSMUSG00000050890	0.0014	0.3569	0.00392267	0.17985
ENSSSCG00000002410	ENSMUSG00000061533	0.1146	1.1394	0.100579	0.5843
ENSSSCG00000027270	ENSMUSG00000021079	0.0207	0.4294	0.0482068	0.1354
ENSSSCG00000005987	ENSMUSG00000022364	0.1365	0.7304	0.186884	0.5017
ENSSSCG00000023917	ENSMUSG00000034601	0.1284	0.6317	0.203261	0.44425
ENSSSCG00000003030	ENSMUSG00000005442	0.0706	0.4839	0.145898	0.31255
ENSSSCG00000001515	ENSMUSG00000079605	0.1674	0.6155	0.271974	0.47515
ENSSSCG00000027383	ENSMUSG00000034601	0.2336	0.8289	0.281819	0.54805
ENSSSCG00000002680	ENSMUSG00000031832	0.2128	0.908	0.234361	0.5668
ENSSSCG00000015683	ENSMUSG00000026771	0.0198	0.3193	0.0620106	0.17945
ENSSSCG00000000095	ENSMUSG00000042535	0.0127	0.5241	0.024232	0.17475
ENSSSCG00000009640	ENSMUSG00000095463	0.0304	0.764	0.0397906	0.4124
ENSSSCG00000002876	ENSMUSG00000052997	0.0492	0.691	0.0712012	0.3947
ENSSSCG00000017201	ENSMUSG00000020770	0.024	0.4833	0.0496586	0.16565
ENSSSCG00000000007	ENSMUSG00000022386	0.0695	0.8989	0.0773167	0.51895
ENSSSCG00000011433	ENSMUSG00000020257	0	0	0	0
ENSSSCG00000006523	ENSMUSG00000064068	0.0515	0.486	0.105967	0.1945
ENSSSCG00000011064	ENSMUSG00000026781	0.1753	0.6468	0.271027	0.4987
ENSSSCG00000024080	ENSMUSG00000039771	0.0688	4.5084	0.0152604	2.323
ENSSSCG00000013906	ENSMUSG00000055553	0.0457	1.199	0.0381151	0.5452
ENSSSCG00000027189	ENSMUSG00000019254	0.0832	0.9432	0.0882103	0.5548
ENSSSCG00000003120	ENSMUSG00000006024	0.0058	0.9872	0.0058752	0.4994
ENSSSCG00000013013	ENSMUSG00000024944	0.0189	0.5187	0.0364372	0.17825
ENSSSCG00000018009	ENSMUSG00000020910	0.1309	0.6078	0.215367	0.4348
ENSSSCG00000015288	ENSMUSG00000026439	0.0183	0.4403	0.0415626	0.13845
ENSSSCG00000007438	ENSMUSG00000039804	0.0303	0.3926	0.0771778	0.1266
ENSSSCG00000024001	ENSMUSG00000030084	0.0284	1.0316	0.0275301	0.5442
ENSSSCG00000009568	ENSMUSG00000040123	0.2245	0.4859	0.462029	0.46745
ENSSSCG00000010319	ENSMUSG00000021770	0.0601	0.4106	0.146371	0.1654
ENSSSCG00000002411	ENSMUSG00000094374	0.066	0.4459	0.148015	0.18895
ENSSSCG00000022957	ENSMUSG00000054509	0.2717	0.9678	0.28074	0.5556
ENSSSCG00000002137	ENSMUSG00000035960	0.0208	0.7464	0.0278671	0.394
ENSSSCG00000014068	ENSMUSG00000041747	0.0632	0.5248	0.120427	0.3256
ENSSSCG00000023361	ENSMUSG00000061474	0.0823	0.6038	0.136303	0.3842
ENSSSCG00000016961	ENSMUSG00000069089	0.0153	0.5373	0.0284757	0.18395
ENSSSCG00000025322	ENSMUSG00000031631	0.1713	0.7064	0.242497	0.5245
ENSSSCG00000006504	ENSMUSG00000028060	0.0197	0.3624	0.0543598	0.1009
ENSSSCG00000001049	ENSMUSG00000021366	0.2006	0.828	0.242271	0.5146
ENSSSCG00000025701	ENSMUSG00000032475	0.0104	0.5013	0.0207461	0.16105
ENSSSCG00000023929	ENSMUSG00000000811	0.0878	1.0543	0.083278	0.51495
ENSSSCG00000024055	ENSMUSG00000021275	0.0519	0.73	0.0710959	0.4169
ENSSSCG00000016226	ENSMUSG00000026245	0.0733	0.8248	0.08887	0.4857
ENSSSCG00000008548	ENSMUSG00000053134	0.0278	0.4495	0.0618465	0.15255
ENSSSCG00000027809	ENSMUSG00000025857	0.1653	2.5597	0.0645779	1.44515
ENSSSCG00000027046	ENSMUSG00000069044	0.0846	0.6029	0.140322	0.38605
ENSSSCG00000013039	ENSMUSG00000037349	0.1004	0.7175	0.13993	0.45915
ENSSSCG00000000793	ENSMUSG00000079737	0.3521	0.6561	0.536656	0.58015
ENSSSCG00000023636	ENSMUSG00000028857	0.0439	0.8551	0.051339	0.47145
ENSSSCG00000005196	ENSMUSG00000028398	0.4129	1.1335	0.36427	0.77965
ENSSSCG00000013764	ENSMUSG00000031706	0.0311	0.7187	0.0432726	0.39045
ENSSSCG00000022796	ENSMUSG00000028398	0.4129	1.1335	0.36427	0.77965
ENSSSCG00000017089	ENSMUSG00000018340	0.0449	0.7556	0.059423	0.4227
ENSSSCG00000017745	ENSMUSG00000035575	0.0757	0.5368	0.141021	0.3441
ENSSSCG00000001206	ENSMUSG00000022228	0.2041	0.6066	0.336466	0.5074
ENSSSCG00000030384	ENSMUSG00000057147	0.1953	1.1389	0.171481	0.56475
ENSSSCG00000024382	ENSMUSG00000025857	0.1653	2.5597	0.0645779	1.44515
ENSSSCG00000004799	ENSMUSG00000040321	0.1111	0.5385	0.206314	0.38035
ENSSSCG00000014577	ENSMUSG00000031021	0.1178	1.0376	0.113531	0.5366
ENSSSCG00000009276	ENSMUSG00000021952	0.0234	0.7679	0.0304727	0.40735
ENSSSCG00000002528	ENSMUSG00000021275	0.1807	0.9171	0.197034	0.53925
ENSSSCG00000015689	ENSMUSG00000026356	0.0211	0.4723	0.044675	0.15725
ENSSSCG00000006098	ENSMUSG00000045205	0.0666	0.5745	0.115927	0.35385
ENSSSCG00000022186	ENSMUSG00000040383	0.0193	0.6322	0.0305283	0.3354
ENSSSCG00000010518	ENSMUSG00000034321	0.0216	0.5201	0.0415305	0.18165
ENSSSCG00000029104	ENSMUSG00000021635	0.2173	0.7875	0.275937	0.51105
ENSSSCG00000021760	ENSMUSG00000054611	0.015	0.3659	0.0409948	0.19795
ENSSSCG00000017354	ENSMUSG00000034621	0.0584	0.4445	0.131384	0.18065
ENSSSCG00000001898	ENSMUSG00000032308	0.0708	0.6326	0.111919	0.3871
ENSSSCG00000003098	ENSMUSG00000003099	0.0209	0.6758	0.0309263	0.3588
ENSSSCG00000013647	ENSMUSG00000019471	0.0282	1.305	0.0216092	0.5807
ENSSSCG00000030174	ENSMUSG00000063801	0.0048	0.4452	0.0107817	0.1274
ENSSSCG00000028790	ENSMUSG00000047909	0.1527	1.1033	0.138403	0.50435
ENSSSCG00000002406	ENSMUSG00000021037	0.032	0.4397	0.0727769	0.15185
ENSSSCG00000020885	ENSMUSG00000023068	0.0423	0.3464	0.122113	0.1155
ENSSSCG00000012655	ENSMUSG00000036959	0.0544	0.4797	0.113404	0.19425
ENSSSCG00000007279	ENSMUSG00000047459	0.0138	0.3787	0.0364405	0.10315
ENSSSCG00000021023	ENSMUSG00000022983	0.0553	0.4477	0.12352	0.17915
ENSSSCG00000002853	ENSMUSG00000054676	0.2054	0.8764	0.234368	0.5436
ENSSSCG00000014961	ENSMUSG00000004096	0.0061	0.6514	0.00936445	0.3318
ENSSSCG00000002530	ENSMUSG00000021276	0.1532	0.8291	0.184779	0.56775
ENSSSCG00000006663	ENSMUSG00000038495	0.0612	0.4185	0.146237	0.17045
ENSSSCG00000026973	ENSMUSG00000022635	0.1018	1.1484	0.0886451	0.576
ENSSSCG00000011358	ENSMUSG00000049734	0.1562	0.7267	0.214944	0.51955
ENSSSCG00000000383	ENSMUSG00000025373	0.003	0.5917	0.00507014	0.19885
ENSSSCG00000007282	ENSMUSG00000038383	0.0617	0.5102	0.120933	0.3168
ENSSSCG00000011359	ENSMUSG00000025646	0.1716	0.5078	0.337928	0.4255
ENSSSCG00000000870	ENSMUSG00000060904	0.0025	0.4707	0.00531124	0.13785
ENSSSCG00000016208	ENSMUSG00000026197	0.0518	0.4604	0.112511	0.182
ENSSSCG00000001880	ENSMUSG00000042557	0.0082	0.418	0.0196172	0.1172
ENSSSCG00000004899	ENSMUSG00000026319	0.0401	0.3626	0.11059	0.1214
ENSSSCG00000024297	ENSMUSG00000015759	0	0	0	0
ENSSSCG00000013298	ENSMUSG00000010914	0.0972	0.5414	0.179535	0.3679
ENSSSCG00000023711	ENSMUSG00000074748	0.045	0.5662	0.0794772	0.3281
ENSSSCG00000006988	ENSMUSG00000031595	0.0696	0.9205	0.0756111	0.52985
ENSSSCG00000003121	ENSMUSG00000006021	0.058	1.0729	0.0540591	0.59445
ENSSSCG00000023306	ENSMUSG00000017670	0.0058	0.8562	0.00677412	0.4339
ENSSSCG00000011253	ENSMUSG00000036737	0.2894	1.0791	0.268186	0.42895
ENSSSCG00000006386	ENSMUSG00000026553	0.0081	0.4308	0.0188022	0.1235
ENSSSCG00000008546	ENSMUSG00000064037	0.0489	0.5215	0.093768	0.30965
ENSSSCG00000025351	ENSMUSG00000071661	0.0876	0.441	0.198639	0.3081
ENSSSCG00000002532	ENSMUSG00000021271	0.5074	0.9278	0.546885	0.7713
ENSSSCG00000029470	ENSMUSG00000029649	0.2143	2.1644	0.0990113	1.2965
ENSSSCG00000013908	ENSMUSG00000058833	0.2062	1.2224	0.168685	0.4174
ENSSSCG00000004901	ENSMUSG00000056536	0.1351	0.5034	0.268375	0.3868
ENSSSCG00000007284	ENSMUSG00000038369	0.0481	0.2534	0.189818	0.1748
ENSSSCG00000013510	ENSMUSG00000019578	0.0924	1.7633	0.0524017	0.77405
ENSSSCG00000025734	ENSMUSG00000010936	0.0351	0.7167	0.0489745	0.39345
ENSSSCG00000028853	ENSMUSG00000050471	0.0634	0.4666	0.135877	0.1967
ENSSSCG00000009128	ENSMUSG00000074238	0.0419	0.9715	0.0431292	0.52765
ENSSSCG00000017691	ENSMUSG00000018405	0.1026	0.6787	0.151171	0.44195
ENSSSCG00000010571	ENSMUSG00000039901	0.0091	0.4097	0.0222114	0.11395
ENSSSCG00000015201	ENSMUSG00000042138	0.0161	0.2893	0.0556516	0.16075
ENSSSCG00000017577	ENSMUSG00000034239	0.5258	0.7894	0.666076	0.7205
ENSSSCG00000014337	ENSMUSG00000024360	0	0	0	0
ENSSSCG00000002138	ENSMUSG00000006289	0.0321	0.6514	0.0492785	0.3578
ENSSSCG00000023385	ENSMUSG00000022364	0.0356	0.5936	0.059973	0.3324
ENSSSCG00000009435	ENSMUSG00000022020	0.0689	0.592	0.116385	0.3649
ENSSSCG00000021586	ENSMUSG00000071757	0.0778	0.7795	0.0998076	0.46755
ENSSSCG00000028413	ENSMUSG00000071660	0.0547	0.5642	0.0969514	0.3368
ENSSSCG00000026790	ENSMUSG00000010936	0.1122	0.8405	0.133492	0.53245
ENSSSCG00000028320	ENSMUSG00000026245	0.0396	0.459	0.0862745	0.1691
ENSSSCG00000002725	ENSMUSG00000033732	0.0182	0.5853	0.0310952	0.31085
ENSSSCG00000030566	ENSMUSG00000036817	0.2699	2.3023	0.117231	1.42105
ENSSSCG00000013406	ENSMUSG00000005609	0.017	0.7624	0.022298	0.3982
ENSSSCG00000010822	ENSMUSG00000026617	0.0353	0.8213	0.0429806	0.44595
ENSSSCG00000004253	ENSMUSG00000019861	0.0398	0.6718	0.0592438	0.3757
ENSSSCG00000017803	ENSMUSG00000020843	0.0304	0.5527	0.0550027	0.30675
ENSSSCG00000020829	ENSMUSG00000003444	0.0379	0.8033	0.0471804	0.43955
ENSSSCG00000021451	ENSMUSG00000055128	0.1556	0.6193	0.251251	0.46525
ENSSSCG00000010574	ENSMUSG00000025223	0	0	0	0
ENSSSCG00000017203	ENSMUSG00000020766	0.0602	0.6899	0.087259	0.40515
ENSSSCG00000015718	ENSMUSG00000026388	0.0943	0.5969	0.157983	0.39275
ENSSSCG00000014623	ENSMUSG00000089847	0.0511	0.4429	0.115376	0.17255
ENSSSCG00000009758	ENSMUSG00000029480	0.2334	1.9063	0.122436	1.18655
ENSSSCG00000005427	ENSMUSG00000028414	0.0666	0.4664	0.142796	0.1998
ENSSSCG00000007308	ENSMUSG00000067847	0	0	0	0
ENSSSCG00000030947	ENSMUSG00000022335	0.0304	0.8637	0.0351974	0.46225
ENSSSCG00000021663	ENSMUSG00000033099	0.0464	0.8477	0.0547363	0.47025
ENSSSCG00000008668	ENSMUSG00000061898	0.1301	0.8755	0.148601	0.56785
ENSSSCG00000002367	ENSMUSG00000021241	0.0903	0.4598	0.19639	0.3202
ENSSSCG00000016134	ENSMUSG00000025962	0.2402	0.4681	0.513138	0.47425
ENSSSCG00000001057	ENSMUSG00000021371	0.1743	0.77	0.226364	0.5593
ENSSSCG00000022836	ENSMUSG00000037149	0.0845	0.7855	0.107575	0.47725
ENSSSCG00000008346	ENSMUSG00000030051	0.2796	0.7172	0.389849	0.5382
ENSSSCG00000026018	ENSMUSG00000027775	0.0878	0.5836	0.150446	0.3796
ENSSSCG00000023047	ENSMUSG00000030016	0.1437	0.4156	0.345765	0.3515
ENSSSCG00000015769	ENSMUSG00000048355	0.0913	1.0885	0.0838769	0.53555
ENSSSCG00000012874	ENSMUSG00000031072	0.1657	1.6998	0.0974821	1.0156
ENSSSCG00000006993	ENSMUSG00000031592	0.0882	0.3102	0.284333	0.1433
ENSSSCG00000014376	ENSMUSG00000019143	0.1047	0.5346	0.195847	0.372
ENSSSCG00000024375	ENSMUSG00000042699	0.096	0.5901	0.162684	0.39105
ENSSSCG00000024928	ENSMUSG00000003660	0.0131	0.8367	0.0156567	0.43145
ENSSSCG00000015552	ENSMUSG00000042699	0.0114	0.4666	0.0244321	0.1447
ENSSSCG00000004144	ENSMUSG00000039879	0.021	0.8848	0.0237342	0.4634
ENSSSCG00000004047	ENSMUSG00000057388	0.1238	0.5654	0.21896	0.4065
ENSSSCG00000010211	ENSMUSG00000048701	0.0144	0.835	0.0172455	0.4319
ENSSSCG00000006994	ENSMUSG00000031592	0.066	0.5394	0.122358	0.3357
ENSSSCG00000013347	ENSMUSG00000030505	0.0539	0.7399	0.0728477	0.42385
ENSSSCG00000013763	ENSMUSG00000037103	0.0381	0.7476	0.0509631	0.4119
ENSSSCG00000029097	ENSMUSG00000028896	0.042	0.5627	0.0746401	0.32335
ENSSSCG00000014768	ENSMUSG00000073968	0.1286	1.0338	0.124395	0.5455
ENSSSCG00000013349	ENSMUSG00000039745	0.0954	0.5324	0.179189	0.3616
ENSSSCG00000003141	ENSMUSG00000008461	0.1808	1.556	0.116195	0.7588
ENSSSCG00000000999	ENSMUSG00000059288	0.0205	1.4163	0.0144743	0.52865
ENSSSCG00000002956	ENSMUSG00000030591	0.0661	0.8066	0.0819489	0.4694
ENSSSCG00000028152	ENSMUSG00000032469	0.3622	1.7135	0.21138	1.21895
ENSSSCG00000009492	ENSMUSG00000022131	0.0745	0.8003	0.0930901	0.47465
ENSSSCG00000000520	ENSMUSG00000063334	0.035	0.7305	0.0479124	0.40025
ENSSSCG00000027299	ENSMUSG00000029056	0.0302	1.4768	0.0204496	0.5686
ENSSSCG00000023003	ENSMUSG00000034453	0.0384	1.1611	0.0330721	0.51895
ENSSSCG00000013094	ENSMUSG00000024740	0.0024	0.6196	0.00387347	0.3122
ENSSSCG00000013239	ENSMUSG00000002102	0.004	0.7424	0.00538793	0.3752
ENSSSCG00000007664	ENSMUSG00000029722	0.1104	0.6982	0.158121	0.4595
ENSSSCG00000016367	ENSMUSG00000026269	0.0316	1.3249	0.0238509	0.59405
ENSSSCG00000008990	ENSMUSG00000029486	0.1141	0.6838	0.166862	0.456
ENSSSCG00000021472	ENSMUSG00000004667	0.004	1.7514	0.00228389	0.4797
ENSSSCG00000007550	ENSMUSG00000045438	0.0822	0.7635	0.107662	0.46395
ENSSSCG00000011897	ENSMUSG00000034064	0.0449	0.5435	0.0826127	0.31665
ENSSSCG00000027064	ENSMUSG00000034064	0.0714	0.5555	0.128533	0.34915
ENSSSCG00000029901	ENSMUSG00000020802	0.0775	1.2195	0.0635506	0.58725
ENSSSCG00000015145	ENSMUSG00000025602	0.1818	0.7739	0.234914	0.56875
ENSSSCG00000012036	ENSMUSG00000022972	0.0401	0.8684	0.0461769	0.4743
ENSSSCG00000014558	ENSMUSG00000025486	0.1079	0.7636	0.141304	0.4897
ENSSSCG00000015721	ENSMUSG00000024382	0.0213	0.8437	0.0252459	0.44315
ENSSSCG00000000097	ENSMUSG00000022427	0.0556	0.4607	0.120686	0.18595
ENSSSCG00000029634	ENSMUSG00000036528	0.137	0.8128	0.168553	0.5434
ENSSSCG00000016960	ENSMUSG00000021635	0.1016	0.5401	0.188113	0.37165
ENSSSCG00000030394	ENSMUSG00000034453	0	0	0	0
ENSSSCG00000000169	ENSMUSG00000034453	0.0061	0.6303	0.00967793	0.32125
ENSSSCG00000023974	ENSMUSG00000058318	0.0233	0.2425	0.0960825	0.14455
ENSSSCG00000020737	ENSMUSG00000079478	0.0713	0.5555	0.128353	0.34905
ENSSSCG00000020721	ENSMUSG00000027361	0.105	0.5328	0.197072	0.3714
ENSSSCG00000006835	ENSMUSG00000068739	0.0302	0.6776	0.0445691	0.369
ENSSSCG00000012849	ENSMUSG00000025505	0.2771	2.0776	0.133375	1.3159
ENSSSCG00000002535	ENSMUSG00000021270	0.0202	1.2419	0.0162654	0.54115
ENSSSCG00000014865	ENSMUSG00000030753	0.0453	0.685	0.0661314	0.3878
ENSSSCG00000003016	ENSMUSG00000002608	0.095	1.1003	0.0863401	0.54515
ENSSSCG00000005440	ENSMUSG00000038827	0.0769	0.5225	0.147177	0.33815
ENSSSCG00000014868	ENSMUSG00000035401	0.0203	0.2623	0.0773923	0.15145
ENSSSCG00000020964	ENSMUSG00000027879	0.0022	0.4167	0.00527958	0.11055
ENSSSCG00000028542	ENSMUSG00000071659	0.0324	0.3456	0.09375	0.1052
ENSSSCG00000009234	ENSMUSG00000035234	0.184	0.9487	0.19395	0.55835
ENSSSCG00000012927	ENSMUSG00000024889	0.0244	0.5102	0.0478244	0.1795
ENSSSCG00000016773	ENSMUSG00000025821	0.1275	1.3682	0.0931881	0.4116
ENSSSCG00000016711	ENSMUSG00000029836	0.0024	0.6015	0.00399002	0.30315
ENSSSCG00000007952	ENSMUSG00000005981	0.0822	0.9316	0.0882353	0.548
ENSSSCG00000030445	ENSMUSG00000029587	0.131	1.225	0.106939	0.5435
ENSSSCG00000006762	ENSMUSG00000032952	0.0516	0.579	0.0891192	0.3411
ENSSSCG00000003918	ENSMUSG00000028688	0.1118	0.6008	0.186085	0.4122
ENSSSCG00000010575	ENSMUSG00000055491	0.2006	0.5633	0.356116	0.48225
ENSSSCG00000009508	ENSMUSG00000037710	0.1469	1.0324	0.14229	0.5631
ENSSSCG00000013383	ENSMUSG00000030663	0.0266	0.8388	0.031712	0.446
ENSSSCG00000010519	ENSMUSG00000025157	0.0118	0.419	0.0281623	0.1213
ENSSSCG00000005441	ENSMUSG00000028431	0.108	0.5478	0.197152	0.3819
ENSSSCG00000024721	ENSMUSG00000044847	0.0424	0.5398	0.0785476	0.3123
ENSSSCG00000030013	ENSMUSG00000026354	0.1311	0.7419	0.176708	0.50205
ENSSSCG00000006939	ENSMUSG00000074182	0.2332	0.8771	0.265876	0.57175
ENSSSCG00000010030	ENSMUSG00000020454	0.0473	0.3342	0.141532	0.1144
ENSSSCG00000009890	ENSMUSG00000029454	0.0131	0.448	0.0292411	0.1371
ENSSSCG00000010759	ENSMUSG00000031068	0.0469	0.6464	0.0725557	0.3701
ENSSSCG00000008487	ENSMUSG00000059811	0.0394	0.526	0.0749049	0.3024
ENSSSCG00000022260	ENSMUSG00000020605	0.1195	0.8445	0.141504	0.54175
ENSSSCG00000027556	ENSMUSG00000034544	0.0696	1.0219	0.0681084	0.58055
ENSSSCG00000009509	ENSMUSG00000030662	0.0084	0.5788	0.0145128	0.1978
ENSSSCG00000017184	ENSMUSG00000015869	0.0141	0.6593	0.0213863	0.34375
ENSSSCG00000006203	ENSMUSG00000025917	0.0027	0.4396	0.00614195	0.1225
ENSSSCG00000015793	ENSMUSG00000031634	0.1281	0.6709	0.190938	0.46355
ENSSSCG00000015509	ENSMUSG00000040782	0.1023	0.4446	0.230094	0.3246
ENSSSCG00000025305	ENSMUSG00000020630	0.1703	0.8748	0.194673	0.5077
ENSSSCG00000008559	ENSMUSG00000038828	0.0985	0.58	0.169828	0.3885
ENSSSCG00000022950	ENSMUSG00000032059	0.0585	0.7135	0.0819902	0.41525
ENSSSCG00000007451	ENSMUSG00000027661	0.1716	0.804	0.213433	0.5736
ENSSSCG00000013177	ENSMUSG00000027080	0.0246	0.432	0.0569444	0.1406
ENSSSCG00000006623	ENSMUSG00000005779	0.0367	0.4873	0.0753129	0.18035
ENSSSCG00000015023	ENSMUSG00000032059	0.0374	0.6672	0.0560552	0.371
ENSSSCG00000010289	ENSMUSG00000020111	0.0495	0.6747	0.0733659	0.38685
ENSSSCG00000001972	ENSMUSG00000020955	0.0191	0.6595	0.0289613	0.34885
ENSSSCG00000026498	ENSMUSG00000025404	0.031	0.3271	0.0947722	0.19455
ENSSSCG00000024026	ENSMUSG00000020265	0.0704	2.1687	0.0324618	1.15475
ENSSSCG00000003262	ENSMUSG00000006335	0.0409	0.6438	0.063529	0.3628
ENSSSCG00000011853	ENSMUSG00000035629	0.0617	0.4838	0.127532	0.3036
ENSSSCG00000016372	ENSMUSG00000026277	0.0193	2.4656	0.00782771	1.2521
ENSSSCG00000029154	ENSMUSG00000003421	0.0338	1.451	0.0232943	0.5593
ENSSSCG00000005996	ENSMUSG00000022370	0.0398	0.6187	0.0643284	0.34915
ENSSSCG00000006996	ENSMUSG00000031590	0.0137	0.6017	0.0227688	0.31455
ENSSSCG00000007452	ENSMUSG00000039725	0.0955	0.8675	0.110086	0.52925
ENSSSCG00000008600	ENSMUSG00000020594	0.0096	0.2252	0.0426288	0.1222
ENSSSCG00000010576	ENSMUSG00000015176	0.1542	0.6331	0.243563	0.47075
ENSSSCG00000014557	ENSMUSG00000025485	0.0626	0.9912	0.0631558	0.5582
ENSSSCG00000013761	ENSMUSG00000036686	0.1032	0.7136	0.144619	0.46
ENSSSCG00000014598	ENSMUSG00000036528	0.0625	0.7116	0.0878302	0.4183
ENSSSCG00000007780	ENSMUSG00000045639	0.0493	0.8689	0.0567384	0.48375
ENSSSCG00000028786	ENSMUSG00000021639	0.0163	0.4655	0.0350161	0.14905
ENSSSCG00000024388	ENSMUSG00000078566	0.097	1.4077	0.0689067	0.40085
ENSSSCG00000023440	ENSMUSG00000021103	0.086	0.9803	0.0877282	0.57615
ENSSSCG00000015690	ENSMUSG00000026353	0.0737	0.6367	0.115753	0.39205
ENSSSCG00000024529	ENSMUSG00000034442	0.1284	0.5864	0.218963	0.4216
ENSSSCG00000021341	ENSMUSG00000025404	0.0931	0.4626	0.201254	0.3244
ENSSSCG00000023548	ENSMUSG00000028018	0.1095	0.4688	0.233575	0.3439
ENSSSCG00000028378	ENSMUSG00000038116	0.093	0.5405	0.172063	0.36325
ENSSSCG00000009953	ENSMUSG00000051339	0.166	1.0782	0.15396	0.5051
ENSSSCG00000013463	ENSMUSG00000064317	0.0116	1.2816	0.00905119	0.5524
ENSSSCG00000030284	ENSMUSG00000028898	0.0063	0.4416	0.0142663	0.1271
ENSSSCG00000011658	ENSMUSG00000032468	0.0065	0.3471	0.0187266	0.18005
ENSSSCG00000000998	ENSMUSG00000021418	0.105	0.5578	0.18824	0.3839
ENSSSCG00000004647	ENSMUSG00000023330	0.1755	0.8994	0.19513	0.5252
ENSSSCG00000030617	ENSMUSG00000028016	0.0693	0.4549	0.152341	0.19675
ENSSSCG00000017094	ENSMUSG00000039100	0.013	0.4179	0.0311079	0.12195
ENSSSCG00000030025	ENSMUSG00000027176	0.0634	1.1029	0.0574848	0.51485
ENSSSCG00000012850	ENSMUSG00000058886	0.0398	1.0827	0.03676	0.58115
ENSSSCG00000003428	ENSMUSG00000029009	0.0575	0.9218	0.062378	0.5184
ENSSSCG00000004648	ENSMUSG00000027209	0.3871	0.5226	0.740719	0.5484
ENSSSCG00000027139	ENSMUSG00000022800	0.0194	0.4324	0.0448659	0.1356
ENSSSCG00000006507	ENSMUSG00000068921	0.1143	0.674	0.169585	0.4513
ENSSSCG00000016970	ENSMUSG00000021645	0.0957	0.5758	0.166204	0.3836
ENSSSCG00000016775	ENSMUSG00000071477	0.3008	1.2633	0.238107	0.73245
ENSSSCG00000022788	ENSMUSG00000028013	0.267	1.1	0.242727	0.417
ENSSSCG00000022365	ENSMUSG00000028013	0.0539	0.7218	0.0746744	0.4148
ENSSSCG00000002729	ENSMUSG00000010936	0.0673	0.7255	0.0927636	0.43005
ENSSSCG00000008347	ENSMUSG00000044966	0.1374	0.6625	0.207396	0.46865
ENSSSCG00000014873	ENSMUSG00000030760	0.1015	0.4552	0.222979	0.3291
ENSSSCG00000013460	ENSMUSG00000035242	0.0838	0.58	0.144483	0.3738
ENSSSCG00000029539	ENSMUSG00000004768	0.0427	0.7608	0.0561251	0.4231
ENSSSCG00000028603	ENSMUSG00000014498	0.0349	0.2632	0.132599	0.1665
ENSSSCG00000007312	ENSMUSG00000046229	0.1487	2.0827	0.0713977	1.19005
ENSSSCG00000020907	ENSMUSG00000028010	0.0278	0.6507	0.0427232	0.35315
ENSSSCG00000009236	ENSMUSG00000035266	0.1457	0.7074	0.205966	0.4994
ENSSSCG00000007786	ENSMUSG00000030816	0.04	0.8308	0.0481464	0.4554
ENSSSCG00000001973	ENSMUSG00000020952	0.0212	0.5072	0.0417981	0.1748
ENSSSCG00000030697	ENSMUSG00000021893	0.0266	0.5157	0.0515804	0.18445
ENSSSCG00000003288	ENSMUSG00000063802	0.0154	0.7385	0.0208531	0.38465
ENSSSCG00000000879	ENSMUSG00000019948	0.0141	0.7116	0.0198145	0.3699
ENSSSCG00000014211	ENSMUSG00000034653	0.0074	0.4369	0.0169375	0.12585
ENSSSCG00000000170	ENSMUSG00000020034	0.1026	0.5344	0.191991	0.3698
ENSSSCG00000015836	ENSMUSG00000004980	0.0136	0.3726	0.0365003	0.1999
ENSSSCG00000011294	ENSMUSG00000038233	0.2629	0.6782	0.387644	0.502
ENSSSCG00000017091	ENSMUSG00000020400	0.1138	0.8346	0.136353	0.5311
ENSSSCG00000002502	ENSMUSG00000041341	0.0531	0.6388	0.0831246	0.3725
ENSSSCG00000000552	ENSMUSG00000030291	0.0098	0.4485	0.0218506	0.13405
ENSSSCG00000003263	ENSMUSG00000008373	0.0052	1.8065	0.00287849	0.70845
ENSSSCG00000016776	ENSMUSG00000057691	0.0561	1.0167	0.0551785	0.56445
ENSSSCG00000016969	ENSMUSG00000021643	0.0431	0.5223	0.0825196	0.30425
ENSSSCG00000010823	ENSMUSG00000026618	0.1159	0.7058	0.164211	0.4688
ENSSSCG00000017049	ENSMUSG00000011254	0.1237	0.5646	0.219093	0.406
ENSSSCG00000000553	ENSMUSG00000040234	0.1233	0.714	0.172689	0.4803
ENSSSCG00000001539	ENSMUSG00000002250	0.0459	0.7985	0.0574828	0.44515
ENSSSCG00000016845	ENSMUSG00000022142	0.0279	0.6129	0.0455213	0.33435
ENSSSCG00000028336	ENSMUSG00000047694	0.092	1.2111	0.075964	0.59755
ENSSSCG00000025187	ENSMUSG00000030615	0.1722	0.5044	0.341396	0.4244
ENSSSCG00000009858	ENSMUSG00000032898	0.0205	0.8333	0.024601	0.43715
ENSSSCG00000011684	ENSMUSG00000032407	0.0043	0.4384	0.00980839	0.1235
ENSSSCG00000025047	ENSMUSG00000029703	0.1291	1.1036	0.116981	0.5809
ENSSSCG00000027080	ENSMUSG00000030760	0.316	0.9781	0.323075	0.40505
ENSSSCG00000003626	ENSMUSG00000054405	0.0022	0.6129	0.00358949	0.30865
ENSSSCG00000004403	ENSMUSG00000038446	0.0056	0.4864	0.0115132	0.1488
ENSSSCG00000004652	ENSMUSG00000027206	0.016	0.413	0.0387409	0.1225
ENSSSCG00000003404	ENSMUSG00000028974	0.1629	0.6256	0.26039	0.4757
ENSSSCG00000010032	ENSMUSG00000023452	0.094	0.9795	0.0959673	0.58375
ENSSSCG00000028635	ENSMUSG00000015942	0.1141	1.1889	0.0959711	0.50855
ENSSSCG00000004263	ENSMUSG00000039531	0.1017	0.5358	0.18981	0.3696
ENSSSCG00000023140	ENSMUSG00000029145	0.2956	0.6703	0.440997	0.53075
ENSSSCG00000023677	ENSMUSG00000000743	0.0127	1.2894	0.00984954	0.5574
ENSSSCG00000009739	ENSMUSG00000033294	0.1185	1.0871	0.109006	0.56205
ENSSSCG00000030373	ENSMUSG00000030876	0.0137	0.3456	0.0396412	0.1865
ENSSSCG00000015794	ENSMUSG00000071103	0.1277	0.6964	0.183372	0.4759
ENSSSCG00000029158	ENSMUSG00000001383	0.0021	0.6917	0.003036	0.34795
ENSSSCG00000000877	ENSMUSG00000069539	0.0581	0.5504	0.10556	0.3333
ENSSSCG00000025682	ENSMUSG00000019948	0.008	0.7628	0.0104877	0.3894
ENSSSCG00000028073	ENSMUSG00000046731	0.0577	0.6712	0.0859654	0.3933
ENSSSCG00000007558	ENSMUSG00000029547	0.0514	1.4842	0.0346315	0.5935
ENSSSCG00000025912	ENSMUSG00000030421	0.1582	0.5902	0.268045	0.4533
ENSSSCG00000001412	ENSMUSG00000043311	0.1786	0.4944	0.361246	0.4258
ENSSSCG00000007686	ENSMUSG00000039754	0.1019	1.7084	0.0596465	0.7561
ENSSSCG00000009917	ENSMUSG00000029550	0.0062	0.4637	0.0133707	0.13805
ENSSSCG00000004821	ENSMUSG00000030509	0.003	0.4778	0.00627878	0.1419
ENSSSCG00000013455	ENSMUSG00000055862	0.1144	0.9465	0.120866	0.58765
ENSSSCG00000025174	ENSMUSG00000073643	0.1121	1.3378	0.0837943	0.581
ENSSSCG00000003727	ENSMUSG00000033382	0.0649	0.5831	0.111302	0.35645
ENSSSCG00000022976	ENSMUSG00000023952	0.0053	0.4726	0.0112146	0.1416
ENSSSCG00000030443	ENSMUSG00000040250	0.0252	0.6834	0.0368745	0.3669
ENSSSCG00000017429	ENSMUSG00000006931	0.0467	0.952	0.0490546	0.5227
ENSSSCG00000016232	ENSMUSG00000026248	0.0716	0.8131	0.088058	0.47815
ENSSSCG00000014568	ENSMUSG00000031024	0.0642	0.7777	0.0825511	0.45305
ENSSSCG00000001656	ENSMUSG00000023971	0.0787	0.6176	0.127429	0.3875
ENSSSCG00000021383	ENSMUSG00000032344	0.3084	0.8289	0.372059	0.52285
ENSSSCG00000007460	ENSMUSG00000074582	0.0259	0.5772	0.0448718	0.3145
ENSSSCG00000013879	ENSMUSG00000031808	0.0655	1.1365	0.0576331	0.53375
ENSSSCG00000003627	ENSMUSG00000042446	0.0307	0.3662	0.083834	0.1138
ENSSSCG00000006552	ENSMUSG00000027944	0.1094	0.4441	0.246341	0.33145
ENSSSCG00000028033	ENSMUSG00000035139	0.1667	1.0199	0.163447	0.57665
ENSSSCG00000001511	ENSMUSG00000024193	0.0488	0.4648	0.104991	0.1812
ENSSSCG00000026744	ENSMUSG00000021969	0.204	0.7227	0.282275	0.56535
ENSSSCG00000012995	ENSMUSG00000024826	0.029	0.5737	0.0505491	0.31585
ENSSSCG00000012878	ENSMUSG00000024831	0.1502	1.3349	0.112518	0.41765
ENSSSCG00000023835	ENSMUSG00000069539	0.0204	0.4449	0.045853	0.14285
ENSSSCG00000010520	ENSMUSG00000025159	0.0624	0.4573	0.136453	0.19105
ENSSSCG00000023890	ENSMUSG00000024773	0.107	0.8604	0.124361	0.5372
ENSSSCG00000017100	ENSMUSG00000034617	0.1498	0.8202	0.182638	0.5599
ENSSSCG00000001947	ENSMUSG00000012076	0.0014	0.5109	0.00274026	0.15685
ENSSSCG00000013758	ENSMUSG00000035671	0.0528	0.9439	0.0559381	0.52475
ENSSSCG00000001774	ENSMUSG00000032353	0.0336	1.8335	0.0183256	0.75035
ENSSSCG00000029881	ENSMUSG00000029047	0.1468	1.6797	0.0873966	0.78665
ENSSSCG00000024359	ENSMUSG00000054237	0.0864	0.5846	0.147793	0.3787
ENSSSCG00000030507	ENSMUSG00000025024	0.0058	0.7106	0.00816212	0.3611
ENSSSCG00000007992	ENSMUSG00000025728	0.0907	1.4379	0.0630781	0.40965
ENSSSCG00000007323	ENSMUSG00000027635	0.2275	0.5138	0.442779	0.4844
ENSSSCG00000017422	ENSMUSG00000001555	0.0507	0.8366	0.0606024	0.469
ENSSSCG00000021007	ENSMUSG00000030045	0.1359	0.8037	0.169093	0.53775
ENSSSCG00000003405	ENSMUSG00000028975	0.0447	0.6015	0.0743142	0.34545
ENSSSCG00000030432	ENSMUSG00000089687	0.1291	0.9063	0.142447	0.58225
ENSSSCG00000002923	ENSMUSG00000037020	0.1256	0.7107	0.176727	0.48095
ENSSSCG00000005097	ENSMUSG00000021113	0.1655	0.7829	0.211394	0.55695
ENSSSCG00000007459	ENSMUSG00000002718	0.0694	0.9264	0.0749136	0.5326
ENSSSCG00000009441	ENSMUSG00000022024	0.0791	0.4818	0.164176	0.32
ENSSSCG00000026672	ENSMUSG00000017999	0.1677	4.8749	0.0344007	2.60515
ENSSSCG00000025202	ENSMUSG00000021737	0.0042	0.6148	0.00683149	0.3116
ENSSSCG00000010605	ENSMUSG00000042694	0.2255	0.7241	0.311421	0.58755
ENSSSCG00000001731	ENSMUSG00000023919	0.2607	0.5796	0.449793	0.5505
ENSSSCG00000029885	ENSMUSG00000032293	0.0323	0.3415	0.0945827	0.10305
ENSSSCG00000023423	ENSMUSG00000050628	0.0599	0.7763	0.0771609	0.44805
ENSSSCG00000005219	ENSMUSG00000024780	0.0631	0.4756	0.132675	0.3009
ENSSSCG00000002143	ENSMUSG00000036023	0.11	0.5622	0.19566	0.3911
ENSSSCG00000030685	ENSMUSG00000033237	0.0393	0.4405	0.0892168	0.15955
ENSSSCG00000014148	ENSMUSG00000035762	0.0232	0.3661	0.0633707	0.10625
ENSSSCG00000022408	ENSMUSG00000066036	0.0185	0.6143	0.0301156	0.32565
ENSSSCG00000029217	ENSMUSG00000034509	0.1645	0.8503	0.193461	0.58965
ENSSSCG00000022410	ENSMUSG00000035569	0.0542	1.8444	0.0293863	0.7764
ENSSSCG00000028735	ENSMUSG00000029504	0.662	2.5474	0.259873	1.9357
ENSSSCG00000028571	ENSMUSG00000032977	0.1408	1.2492	0.112712	0.5654
ENSSSCG00000030410	ENSMUSG00000034848	0.1541	0.8658	0.177986	0.587
ENSSSCG00000007789	ENSMUSG00000107023	0.0902	0.4072	0.221513	0.1938
ENSSSCG00000010031	ENSMUSG00000023764	0.2736	0.9177	0.298137	0.53245
ENSSSCG00000007004	ENSMUSG00000031864	0.0347	0.8018	0.0432776	0.4356
ENSSSCG00000001383	ENSMUSG00000001524	0.008	0.4515	0.0177187	0.13375
ENSSSCG00000030154	ENSMUSG00000044098	0.0263	0.2262	0.116269	0.1394
ENSSSCG00000022786	ENSMUSG00000030036	0.0786	0.6185	0.127082	0.38785
ENSSSCG00000006766	ENSMUSG00000058388	0.0469	0.5406	0.0867555	0.3172
ENSSSCG00000003264	ENSMUSG00000035632	0.0635	0.6548	0.0969762	0.3909
ENSSSCG00000027444	ENSMUSG00000039536	0.0442	0.6141	0.0719752	0.35125
ENSSSCG00000008096	ENSMUSG00000042851	0.1927	0.542	0.355535	0.4637
ENSSSCG00000010824	ENSMUSG00000039318	0.0737	0.7161	0.102919	0.43175
ENSSSCG00000030243	ENSMUSG00000066036	0.039	0.7372	0.0529029	0.4076
ENSSSCG00000011458	ENSMUSG00000015971	0.0105	0.5426	0.0193513	0.1818
ENSSSCG00000006239	ENSMUSG00000028243	0.0879	0.6054	0.145193	0.3906
ENSSSCG00000004395	ENSMUSG00000038481	0	0	0	0
ENSSSCG00000022398	ENSMUSG00000026434	0.021	0.5428	0.0386883	0.1924
ENSSSCG00000004394	ENSMUSG00000038510	0.0694	0.6966	0.0996268	0.4177
ENSSSCG00000026654	ENSMUSG00000020260	0.1554	8.0379	0.0193334	4.17435
ENSSSCG00000029808	ENSMUSG00000028683	0.0793	0.4952	0.160137	0.3269
ENSSSCG00000014799	ENSMUSG00000070425	0.1086	0.8774	0.123775	0.5473
ENSSSCG00000029313	ENSMUSG00000062352	0.0368	1.071	0.0343604	0.5723
ENSSSCG00000028278	ENSMUSG00000005198	0.001	0.9953	0.00100472	0.49865
ENSSSCG00000003339	ENSMUSG00000029034	0.0236	1.3659	0.017278	0.50655
ENSSSCG00000012252	ENSMUSG00000000787	0.0112	0.3856	0.0290456	0.104
ENSSSCG00000026628	ENSMUSG00000026604	0.0442	0.8982	0.0492095	0.4933
ENSSSCG00000001373	ENSMUSG00000024436	0.1438	0.3507	0.410037	0.31915
ENSSSCG00000009164	ENSMUSG00000028165	0.0246	0.6103	0.040308	0.32975
ENSSSCG00000021072	ENSMUSG00000039840	0.0679	0.543	0.125046	0.3394
ENSSSCG00000017099	ENSMUSG00000021532	0.2158	0.8814	0.244838	0.5565
ENSSSCG00000014999	ENSMUSG00000025893	0.0494	0.5638	0.0876197	0.3313
ENSSSCG00000024864	ENSMUSG00000016541	0.1012	0.9949	0.101719	0.59865
ENSSSCG00000003730	ENSMUSG00000024317	0.0219	0.2425	0.0903093	0.14315
ENSSSCG00000021219	ENSMUSG00000039840	0.1735	0.6308	0.275048	0.4889
ENSSSCG00000021736	ENSMUSG00000039033	0.2818	0.6318	0.446027	0.5977
ENSSSCG00000010360	ENSMUSG00000021796	0.0125	0.4046	0.0308947	0.1148
ENSSSCG00000001578	ENSMUSG00000098374	0.1778	0.6334	0.280707	0.4945
ENSSSCG00000023866	ENSMUSG00000015016	0.2072	1.7403	0.11906	1.07735
ENSSSCG00000026113	ENSMUSG00000022708	0.0093	0.6142	0.0151416	0.3164
ENSSSCG00000001497	ENSMUSG00000042197	0.1445	0.7026	0.205665	0.4958
ENSSSCG00000028192	ENSMUSG00000039763	0.1624	1.0123	0.160427	0.56855
ENSSSCG00000018051	ENSMUSG00000019373	0.0197	4.6072	0.00427592	2.3233
ENSSSCG00000029998	ENSMUSG00000025959	0.0123	0.2423	0.0507635	0.13345
ENSSSCG00000005220	ENSMUSG00000040105	0.0763	0.8499	0.0897753	0.50125
ENSSSCG00000007077	ENSMUSG00000045624	0.1206	0.6646	0.181463	0.4529
ENSSSCG00000004498	ENSMUSG00000041840	0.0886	0.5654	0.156703	0.3713
ENSSSCG00000008602	ENSMUSG00000020585	0.0141	0.2952	0.0477642	0.1617
ENSSSCG00000027164	ENSMUSG00000032462	0.0018	0.6243	0.00288323	0.31395
ENSSSCG00000012088	ENSMUSG00000020260	0.0721	1.7339	0.0415826	0.73905
ENSSSCG00000006366	ENSMUSG00000006412	0.0268	0.2888	0.0927978	0.1712
ENSSSCG00000004392	ENSMUSG00000063953	0.0081	0.1684	0.0480998	0.0923
ENSSSCG00000021467	ENSMUSG00000073436	0.2414	1.1239	0.214788	0.40335
ENSSSCG00000009241	ENSMUSG00000035297	0.0023	0.5901	0.00389764	0.19735
ENSSSCG00000003432	ENSMUSG00000044496	0.0533	1.0798	0.049361	0.5932
ENSSSCG00000001692	ENSMUSG00000023967	0.1283	0.7058	0.18178	0.4812
ENSSSCG00000005102	ENSMUSG00000030609	0.1571	1.2229	0.128465	0.56855
ENSSSCG00000017592	ENSMUSG00000059474	0.0117	0.3217	0.0363693	0.17255
ENSSSCG00000015558	ENSMUSG00000042772	0.034	0.2299	0.14789	0.14895
ENSSSCG00000017476	ENSMUSG00000052915	0.0185	0.1364	0.13563	0.0867
ENSSSCG00000015729	ENSMUSG00000026374	0.0867	0.6079	0.142622	0.39065
ENSSSCG00000007465	ENSMUSG00000017929	0.0366	0.8053	0.0454489	0.43925
ENSSSCG00000023336	ENSMUSG00000025956	0.0468	0.2858	0.163751	0.1897
ENSSSCG00000021203	ENSMUSG00000032462	0.029	0.6673	0.0434587	0.36265
ENSSSCG00000013371	ENSMUSG00000006763	0.1087	0.6466	0.16811	0.432
ENSSSCG00000007330	ENSMUSG00000027642	0.0421	0.4771	0.0882415	0.18065
ENSSSCG00000003134	ENSMUSG00000053801	0.0345	0.9292	0.0371287	0.4991
ENSSSCG00000009242	ENSMUSG00000035310	0.0445	0.3751	0.118635	0.13205
ENSSSCG00000005104	ENSMUSG00000030611	0.1471	0.7086	0.207592	0.5014
ENSSSCG00000027961	ENSMUSG00000029547	0.0265	1.5336	0.0172796	0.5933
ENSSSCG00000015414	ENSMUSG00000047221	0.2255	0.5354	0.42118	0.4932
ENSSSCG00000023062	ENSMUSG00000067873	0.2205	1.2384	0.178052	0.4397
ENSSSCG00000009940	ENSMUSG00000029592	0.0631	0.7441	0.0848004	0.43515
ENSSSCG00000008016	ENSMUSG00000038880	0.1013	1.4022	0.0722436	0.4024
ENSSSCG00000030710	ENSMUSG00000005804	0.1831	0.9131	0.200526	0.53965
ENSSSCG00000015730	ENSMUSG00000026377	0.3506	1.0248	0.342116	0.463
ENSSSCG00000025673	ENSMUSG00000063019	0.0929	0.5304	0.175151	0.3581
ENSSSCG00000015943	ENSMUSG00000014959	0.0681	0.4277	0.159224	0.18195
ENSSSCG00000007733	ENSMUSG00000056310	0.119	0.9565	0.124412	0.59725
ENSSSCG00000014830	ENSMUSG00000044881	0.1156	1.1041	0.104701	0.56765
ENSSSCG00000016020	ENSMUSG00000027001	0.1225	0.4658	0.262988	0.3554
ENSSSCG00000017209	ENSMUSG00000020743	0.043	0.507	0.0848126	0.1965
ENSSSCG00000021620	ENSMUSG00000024966	0.0285	0.9207	0.0309547	0.48885
ENSSSCG00000026969	ENSMUSG00000030265	0.0149	0.2341	0.063648	0.13195
ENSSSCG00000005105	ENSMUSG00000030612	0.1279	0.6271	0.203955	0.44145
ENSSSCG00000027983	ENSMUSG00000030788	0.0141	0.3787	0.0372326	0.10345
ENSSSCG00000010862	ENSMUSG00000026490	0.0251	0.5021	0.04999	0.17615
ENSSSCG00000024952	ENSMUSG00000029554	0.2058	2.4626	0.0835702	1.4371
ENSSSCG00000022641	ENSMUSG00000029554	0.2503	8.2699	0.0302664	4.38525
ENSSSCG00000025794	ENSMUSG00000042423	0.0213	0.353	0.0603399	0.1978
ENSSSCG00000004272	ENSMUSG00000073725	0.0425	0.7346	0.0578546	0.4098
ENSSSCG00000015306	ENSMUSG00000046798	0.0458	0.5764	0.0794587	0.334
ENSSSCG00000017360	ENSMUSG00000020923	0.0126	0.7867	0.0160163	0.40595
ENSSSCG00000004832	ENSMUSG00000025326	0.0199	0.3584	0.0555246	0.1991
ENSSSCG00000011575	ENSMUSG00000030314	0.0445	0.7045	0.0631654	0.39675
ENSSSCG00000028589	ENSMUSG00000022701	0.1855	0.4753	0.39028	0.42315
ENSSSCG00000011913	ENSMUSG00000022701	0.2223	0.7374	0.301465	0.591
ENSSSCG00000007993	ENSMUSG00000037326	0.0567	1.5088	0.0375795	0.4111
ENSSSCG00000000444	ENSMUSG00000025410	0.087	0.5415	0.160665	0.35775
ENSSSCG00000015305	ENSMUSG00000040464	0.0914	0.5359	0.170554	0.35935
ENSSSCG00000001859	ENSMUSG00000050973	0.1309	0.7688	0.170265	0.5153
ENSSSCG00000012879	ENSMUSG00000024829	0.1811	0.7755	0.233527	0.56885
ENSSSCG00000007466	ENSMUSG00000039463	0.0076	0.5949	0.0127753	0.30505
ENSSSCG00000013453	ENSMUSG00000035278	0.0772	1.4766	0.0522823	0.4155
ENSSSCG00000000587	ENSMUSG00000030232	0.032	0.4904	0.0652529	0.1772
ENSSSCG00000029345	ENSMUSG00000018572	0.0695	0.4829	0.143922	0.31095
ENSSSCG00000017477	ENSMUSG00000078676	0.0553	0.4802	0.11516	0.1954
ENSSSCG00000017208	ENSMUSG00000020744	0.1508	0.9249	0.163045	0.51325
ENSSSCG00000029723	ENSMUSG00000038611	0.2863	1.8421	0.15542	1.20735
ENSSSCG00000028054	ENSMUSG00000046541	0.0861	0.8394	0.102573	0.5058
ENSSSCG00000001861	ENSMUSG00000032309	0.0857	0.7368	0.116314	0.4541
ENSSSCG00000030182	ENSMUSG00000054499	0.0512	0.677	0.0756278	0.3897
ENSSSCG00000025439	ENSMUSG00000019841	0.0707	0.3863	0.183018	0.16385
ENSSSCG00000013619	ENSMUSG00000051238	0.2819	1.2287	0.229429	0.49625
ENSSSCG00000004500	ENSMUSG00000047466	0.0298	0.3261	0.091383	0.19285
ENSSSCG00000025139	ENSMUSG00000044452	0.1417	1.438	0.0985396	0.4607
ENSSSCG00000010033	ENSMUSG00000054280	0.3895	0.6219	0.626306	0.50045
ENSSSCG00000030632	ENSMUSG00000078923	0.0617	0.7896	0.0781408	0.4565
ENSSSCG00000004926	ENSMUSG00000041837	0.0489	0.598	0.0817726	0.3479
ENSSSCG00000003922	ENSMUSG00000028684	0.0382	0.4154	0.0919596	0.1459
ENSSSCG00000023707	ENSMUSG00000055041	0.1423	1.2792	0.111241	0.5819
ENSSSCG00000017693	ENSMUSG00000018697	0.1064	0.5558	0.191436	0.3843
ENSSSCG00000003265	ENSMUSG00000078813	0.1314	0.7123	0.184473	0.48755
ENSSSCG00000021546	ENSMUSG00000035125	0.1851	0.3837	0.482408	0.37695
ENSSSCG00000017102	ENSMUSG00000034575	0.0514	0.908	0.0566079	0.5054
ENSSSCG00000003490	ENSMUSG00000028741	0.0348	0.9405	0.0370016	0.50505
ENSSSCG00000013736	ENSMUSG00000095266	0.206	0.8805	0.233958	0.54625
ENSSSCG00000008440	ENSMUSG00000024145	0.1551	0.4857	0.319333	0.39795
ENSSSCG00000001658	ENSMUSG00000002767	0.1081	0.5914	0.182787	0.4038
ENSSSCG00000015117	ENSMUSG00000072476	0.079	0.6116	0.129169	0.3848
ENSSSCG00000017211	ENSMUSG00000020740	0.1106	0.8083	0.13683	0.51475
ENSSSCG00000020688	ENSMUSG00000020069	0.0108	0.1759	0.0613985	0.09875
ENSSSCG00000026772	ENSMUSG00000036873	0.0895	0.8289	0.107974	0.50395
ENSSSCG00000009176	ENSMUSG00000094685	0.0159	0.4982	0.0319149	0.165
ENSSSCG00000010258	ENSMUSG00000020085	0.1511	0.8882	0.170119	0.5952
ENSSSCG00000008099	ENSMUSG00000027387	0.1501	0.6313	0.237763	0.46575
ENSSSCG00000001537	ENSMUSG00000024220	0.0353	0.5828	0.0605697	0.3267
ENSSSCG00000002145	ENSMUSG00000006288	0.06	0.4773	0.125707	0.19865
ENSSSCG00000002372	ENSMUSG00000021244	0.054	0.339	0.159292	0.1235
ENSSSCG00000012963	ENSMUSG00000039148	0.0231	1.2477	0.0185141	0.54695
ENSSSCG00000001756	ENSMUSG00000032293	0.0572	0.3955	0.144627	0.15495
ENSSSCG00000006751	ENSMUSG00000027854	0.0404	0.6975	0.0579211	0.38915
ENSSSCG00000022225	ENSMUSG00000026020	0.0255	0.4499	0.0566793	0.15045
ENSSSCG00000028156	ENSMUSG00000025169	0.1076	1.3603	0.0791002	0.58775
ENSSSCG00000008352	ENSMUSG00000020116	0.0603	0.7326	0.0823096	0.4266
ENSSSCG00000003630	ENSMUSG00000041530	0	0	0	0
ENSSSCG00000027343	ENSMUSG00000018567	0	0	0	0
ENSSSCG00000028751	ENSMUSG00000020834	0.0777	0.7974	0.0974417	0.4764
ENSSSCG00000006242	ENSMUSG00000066324	0.0421	0.6373	0.0660599	0.36075
ENSSSCG00000002016	ENSMUSG00000045691	0.2376	0.4909	0.484009	0.48305
ENSSSCG00000026638	ENSMUSG00000028191	0.0501	0.8705	0.0575531	0.48535
ENSSSCG00000015583	ENSMUSG00000026603	0.045	0.8685	0.0518135	0.47925
ENSSSCG00000007840	ENSMUSG00000030880	0.0441	0.6183	0.0713246	0.35325
ENSSSCG00000016374	ENSMUSG00000026279	0.0788	0.9825	0.0802036	0.57005
ENSSSCG00000013756	ENSMUSG00000004996	0.0808	0.856	0.0943925	0.5088
ENSSSCG00000030413	ENSMUSG00000027665	0.0041	0.5534	0.00740875	0.1808
ENSSSCG00000027546	ENSMUSG00000036873	0.0895	0.8289	0.107974	0.50395
ENSSSCG00000030581	ENSMUSG00000030315	0.0618	1.4187	0.043561	0.57115
ENSSSCG00000010238	ENSMUSG00000020069	0.0073	0.5369	0.0135966	0.17575
ENSSSCG00000017190	ENSMUSG00000020792	0.0189	0.7316	0.0258338	0.3847
ENSSSCG00000026864	ENSMUSG00000031370	0.1797	0.9398	0.191211	0.5496
ENSSSCG00000006510	ENSMUSG00000054199	0.1919	0.597	0.321441	0.4904
ENSSSCG00000017867	ENSMUSG00000047260	0.0079	0.5322	0.014844	0.174
ENSSSCG00000026344	ENSMUSG00000001150	0.1358	0.8516	0.159465	0.5616
ENSSSCG00000026046	ENSMUSG00000044442	0.1102	0.4625	0.23827	0.34145
ENSSSCG00000030528	ENSMUSG00000052299	0.0874	0.633	0.138073	0.4039
ENSSSCG00000027135	ENSMUSG00000029147	0.03	0.2918	0.10281	0.1759
ENSSSCG00000027466	ENSMUSG00000029718	0.0891	0.6527	0.13651	0.41545
ENSSSCG00000002860	ENSMUSG00000030417	0.0104	0.4471	0.023261	0.13395
ENSSSCG00000007955	ENSMUSG00000093575	0.1287	0.868	0.148272	0.5627
ENSSSCG00000025676	ENSMUSG00000017210	0.0274	0.7762	0.0353002	0.4155
ENSSSCG00000003103	ENSMUSG00000048920	0.0435	1.0081	0.0431505	0.54755
ENSSSCG00000008194	ENSMUSG00000037351	0.0062	0.6348	0.00976686	0.3236
ENSSSCG00000027748	ENSMUSG00000026618	0.0952	0.8352	0.113985	0.5128
ENSSSCG00000002959	ENSMUSG00000030590	0.15	0.6566	0.22845	0.4783
ENSSSCG00000021803	ENSMUSG00000037415	0.0145	0.4696	0.0308773	0.1493
ENSSSCG00000030364	ENSMUSG00000064254	0.0859	1.0762	0.0798179	0.524
ENSSSCG00000013737	ENSMUSG00000052926	0.0771	0.6918	0.111448	0.423
ENSSSCG00000007785	ENSMUSG00000048921	0.1476	1.4912	0.0989807	0.4932
ENSSSCG00000024794	ENSMUSG00000028920	0.0273	0.5186	0.0526417	0.1866
ENSSSCG00000029397	ENSMUSG00000016541	0.1616	0.96	0.168333	0.5416
ENSSSCG00000013755	ENSMUSG00000004994	0.1735	1.3823	0.125515	0.46465
ENSSSCG00000003182	ENSMUSG00000038406	0.1017	1.1673	0.0871241	0.58535
ENSSSCG00000027957	ENSMUSG00000054967	0.0994	2.5679	0.0387087	1.38335
ENSSSCG00000015242	ENSMUSG00000042185	0.0139	0.4116	0.0337707	0.1197
ENSSSCG00000010294	ENSMUSG00000039599	0.0843	0.6147	0.13714	0.39165
ENSSSCG00000002546	ENSMUSG00000021287	0.21	1.7958	0.11694	1.1079
ENSSSCG00000011459	ENSMUSG00000042682	0.0423	0.4842	0.0873606	0.1844
ENSSSCG00000014342	ENSMUSG00000024357	0.3601	0.7998	0.450238	0.56
ENSSSCG00000007475	ENSMUSG00000074576	0.1055	1.365	0.0772894	0.588
ENSSSCG00000016266	ENSMUSG00000036707	0.0041	0.423	0.00969267	0.1156
ENSSSCG00000008493	ENSMUSG00000024081	0.1077	0.6992	0.154033	0.4573
ENSSSCG00000002926	ENSMUSG00000006095	0.0684	0.7331	0.0933024	0.43495
ENSSSCG00000011762	ENSMUSG00000027671	0.0174	0.7419	0.0234533	0.38835
ENSSSCG00000010260	ENSMUSG00000020088	0.0023	0.3091	0.00744096	0.15685
ENSSSCG00000011018	ENSMUSG00000024234	0.1327	0.7261	0.182757	0.49575
ENSSSCG00000007337	ENSMUSG00000027649	0.0257	0.868	0.0296083	0.4597
ENSSSCG00000007340	ENSMUSG00000027650	0.1067	0.5189	0.205627	0.36615
ENSSSCG00000025739	ENSMUSG00000046603	0.1325	1.0985	0.120619	0.58175
ENSSSCG00000017128	ENSMUSG00000039307	0.1616	1.5535	0.104023	0.73835
ENSSSCG00000029929	ENSMUSG00000049184	0.06	0.3656	0.164114	0.1428
ENSSSCG00000007732	ENSMUSG00000025337	0.013	0.7278	0.0178621	0.3769
ENSSSCG00000028453	ENSMUSG00000055041	0.1423	1.2792	0.111241	0.5819
ENSSSCG00000028906	ENSMUSG00000057229	0.253	1.4384	0.17589	0.7722
ENSSSCG00000005890	ENSMUSG00000033669	0.2399	1.2294	0.195136	0.4546
ENSSSCG00000028065	ENSMUSG00000041264	0.323	0.8756	0.36889	0.5608
ENSSSCG00000029922	ENSMUSG00000021149	0.081	1.3104	0.0618132	0.5362
ENSSSCG00000013728	ENSMUSG00000052456	0.0012	0.7724	0.0015536	0.3874
ENSSSCG00000010699	ENSMUSG00000030850	0.1489	0.7704	0.193276	0.5341
ENSSSCG00000007342	ENSMUSG00000027651	0.0029	0.3223	0.00899783	0.16405
ENSSSCG00000006209	ENSMUSG00000045210	0.015	0.3806	0.0394115	0.1053
ENSSSCG00000007736	ENSMUSG00000053094	0.0228	0.7691	0.029645	0.40735
ENSSSCG00000006037	ENSMUSG00000022307	0.1584	0.7298	0.217046	0.5233
ENSSSCG00000024391	ENSMUSG00000008140	0.0917	1.317	0.0696279	0.5502
ENSSSCG00000022936	ENSMUSG00000061374	0.0923	1.3535	0.0681936	0.56905
ENSSSCG00000028140	ENSMUSG00000018559	0.0056	0.4353	0.0128647	0.12325
ENSSSCG00000003055	ENSMUSG00000051768	0.0749	0.7632	0.0981394	0.4565
ENSSSCG00000013662	ENSMUSG00000004100	0.107	1.3366	0.0800539	0.5753
ENSSSCG00000016783	ENSMUSG00000046034	0.0535	0.5661	0.0945063	0.33655
ENSSSCG00000024133	ENSMUSG00000045210	0.1273	0.4567	0.278739	0.35565
ENSSSCG00000004165	ENSMUSG00000019990	0.0369	0.5304	0.0695701	0.3021
ENSSSCG00000010627	ENSMUSG00000024975	0.0146	0.6095	0.0239541	0.31935
ENSSSCG00000028949	ENSMUSG00000026999	0.0605	0.3207	0.18865	0.12085
ENSSSCG00000003217	ENSMUSG00000038695	0.0439	1.0642	0.0412516	0.576
ENSSSCG00000007615	ENSMUSG00000029625	0.0072	0.5755	0.0125109	0.19495
ENSSSCG00000004423	ENSMUSG00000019845	0.0563	0.6916	0.0814054	0.4021
ENSSSCG00000002021	ENSMUSG00000072494	0.0539	1.4262	0.0377927	0.567
ENSSSCG00000004845	ENSMUSG00000033458	0.2072	0.664	0.312048	0.5392
ENSSSCG00000003731	ENSMUSG00000042680	0.0278	0.5082	0.0547029	0.1819
ENSSSCG00000027415	ENSMUSG00000004637	0.0469	0.8974	0.0522621	0.4956
ENSSSCG00000013838	ENSMUSG00000002625	0.0525	0.5086	0.103225	0.3068
ENSSSCG00000021545	ENSMUSG00000042185	0.1118	1.399	0.0799142	0.4113
ENSSSCG00000026581	ENSMUSG00000041079	0.0938	0.5416	0.173191	0.3646
ENSSSCG00000021688	ENSMUSG00000030471	0.0559	0.3734	0.149705	0.1426
ENSSSCG00000006508	ENSMUSG00000028053	0.0393	0.4667	0.0842083	0.17265
ENSSSCG00000013442	ENSMUSG00000003346	0.0306	0.911	0.0335895	0.4861
ENSSSCG00000015842	ENSMUSG00000009630	0.0017	0.4666	0.00364338	0.135
ENSSSCG00000029147	ENSMUSG00000029048	0.0307	1.5993	0.0191959	0.43035
ENSSSCG00000004032	ENSMUSG00000023826	0.1606	0.749	0.214419	0.5351
ENSSSCG00000007735	ENSMUSG00000025340	0.0158	0.6469	0.0244242	0.33925
ENSSSCG00000007019	ENSMUSG00000031545	0.0247	1.0239	0.0241234	0.53665
ENSSSCG00000014217	ENSMUSG00000033319	0.0179	0.447	0.0400447	0.1414
ENSSSCG00000024628	ENSMUSG00000025899	0.1376	0.6608	0.208232	0.468
ENSSSCG00000005227	ENSMUSG00000041360	0.061	0.6386	0.0955215	0.3803
ENSSSCG00000027594	ENSMUSG00000025616	0.101	0.5665	0.178288	0.38425
ENSSSCG00000004684	ENSMUSG00000033396	0.1706	0.5662	0.301307	0.4537
ENSSSCG00000029921	ENSMUSG00000024122	0.062	0.5894	0.105192	0.3567
ENSSSCG00000026536	ENSMUSG00000038506	0.2131	0.806	0.264392	0.5161
ENSSSCG00000000895	ENSMUSG00000020018	0	0	0	0
ENSSSCG00000007622	ENSMUSG00000029624	0.1427	0.8355	0.170796	0.56045
ENSSSCG00000028377	ENSMUSG00000058240	0.0601	0.515	0.116699	0.3176
ENSSSCG00000022474	ENSMUSG00000040354	0.086	0.6534	0.131619	0.4127
ENSSSCG00000024222	ENSMUSG00000032498	0.0947	0.5534	0.171124	0.3714
ENSSSCG00000029393	ENSMUSG00000064128	0.1511	1.1178	0.135176	0.51
ENSSSCG00000017106	ENSMUSG00000021598	0.0032	0.7596	0.00421274	0.383
ENSSSCG00000026382	ENSMUSG00000021051	0	0	0	0
ENSSSCG00000004847	ENSMUSG00000030521	0.1154	0.7287	0.158364	0.47975
ENSSSCG00000008068	ENSMUSG00000037851	0.0468	0.6402	0.0731022	0.3669
ENSSSCG00000003493	ENSMUSG00000028745	0.0503	0.6947	0.0724054	0.39765
ENSSSCG00000014800	ENSMUSG00000070426	0.0346	0.53	0.065283	0.1996
ENSSSCG00000009563	ENSMUSG00000038497	0.0853	1.5662	0.054463	0.4684
ENSSSCG00000003634	ENSMUSG00000042558	0.0712	0.5884	0.121006	0.3654
ENSSSCG00000010055	ENSMUSG00000006344	0.1504	0.9615	0.156422	0.53115
ENSSSCG00000016380	ENSMUSG00000026273	0.2561	1.0021	0.255563	0.55715
ENSSSCG00000025115	ENSMUSG00000034525	0.6725	1.5423	0.436037	1.44365
ENSSSCG00000009381	ENSMUSG00000063362	0.1157	0.7081	0.163395	0.46975
ENSSSCG00000017108	ENSMUSG00000034525	0.1091	1.2578	0.0867388	0.538
ENSSSCG00000016026	ENSMUSG00000027091	0.0235	0.4865	0.0483042	0.16675
ENSSSCG00000030272	ENSMUSG00000094635	0.1201	1.3931	0.0862106	0.41665
ENSSSCG00000000572	ENSMUSG00000030282	0.0414	0.5304	0.0780543	0.3066
ENSSSCG00000030073	ENSMUSG00000062202	0.0491	0.6002	0.0818061	0.3492
ENSSSCG00000006467	ENSMUSG00000004895	0.0287	0.3961	0.0724565	0.12675
ENSSSCG00000024292	ENSMUSG00000037851	0.0906	0.7173	0.126307	0.44925
ENSSSCG00000007345	ENSMUSG00000027652	0.0109	0.3037	0.0358907	0.16275
ENSSSCG00000008399	ENSMUSG00000020464	0.043	0.6757	0.0636377	0.38085
ENSSSCG00000006859	ENSMUSG00000033554	0.0412	0.4994	0.082499	0.1909
ENSSSCG00000030608	ENSMUSG00000036112	0.0248	0.4825	0.051399	0.16605
ENSSSCG00000022703	ENSMUSG00000024414	0.0798	0.4462	0.178844	0.3029
ENSSSCG00000002740	ENSMUSG00000031731	0.0041	0.2873	0.0142708	0.14775
ENSSSCG00000022508	ENSMUSG00000025878	0.1401	0.2814	0.497868	0.1808
ENSSSCG00000003107	ENSMUSG00000058230	0.0289	0.6038	0.0478635	0.3308
ENSSSCG00000029797	ENSMUSG00000037851	0.0579	0.7214	0.0802606	0.4186
ENSSSCG00000011023	ENSMUSG00000050945	0.3563	1.16	0.307155	0.7363
ENSSSCG00000002353	ENSMUSG00000021234	0.136	0.682	0.199413	0.477
ENSSSCG00000028650	ENSMUSG00000018565	0.1579	0.5147	0.306781	0.41525
ENSSSCG00000008043	ENSMUSG00000052752	0.0182	1.3145	0.0138456	0.57545
ENSSSCG00000008069	ENSMUSG00000021392	0.294	0.6048	0.486111	0.5964
ENSSSCG00000007808	ENSMUSG00000030722	0.1741	0.656	0.265396	0.5021
ENSSSCG00000026205	ENSMUSG00000023826	0.076	0.9922	0.0765975	0.5721
ENSSSCG00000010528	ENSMUSG00000018820	0.058	0.858	0.0675991	0.487
ENSSSCG00000002645	ENSMUSG00000015027	0.0941	1.2288	0.0765788	0.5085
ENSSSCG00000026606	ENSMUSG00000037058	0.007	0.15	0.0466667	0.082
ENSSSCG00000012617	ENSMUSG00000036572	0.0643	0.6235	0.103128	0.37605
ENSSSCG00000022098	ENSMUSG00000031901	0.0504	0.4764	0.105793	0.1886
ENSSSCG00000015564	ENSMUSG00000014980	0.0643	0.4773	0.134716	0.30295
ENSSSCG00000004936	ENSMUSG00000034263	0.0101	0.571	0.0176883	0.1956
ENSSSCG00000017213	ENSMUSG00000020737	0.0542	0.4749	0.114129	0.19165
ENSSSCG00000007958	ENSMUSG00000054939	0.1651	0.711	0.232208	0.5206
ENSSSCG00000017133	ENSMUSG00000025173	0.0081	0.6779	0.0119487	0.34705
ENSSSCG00000026761	ENSMUSG00000025613	0.0199	0.5828	0.0341455	0.3113
ENSSSCG00000015213	ENSMUSG00000062762	0.0129	0.3291	0.0391978	0.17745
[truncated: 818 more rows]
