# Supplementary material for: Characterization of gene promoters in pig: conservative elements, regulatory motifs and evolutionary trend
Source: PeerJ. 2019 Jun 25;7:e7204. doi: 10.7717/peerj.7204 (PMC6598670; doi:10.7717/peerj.7204)
Supplement: Supplemental Information 9 — Lists of dN, dS, dN/dS and dP in TS coding sequences and promoters. [file peerj-07-7204-s009.xls]

## Sheet: Sheet1
Pig Gene_ID	Mouse Gene_ID	dN with Mouse	dS with Mouse	dN/dS	dP
ENSSSCG00000000031	ENSMUSG00000048755	0.1409	0.8634	0.163192	1.93354
ENSSSCG00000000064	ENSMUSG00000022477	0.0092	0.6493	0.0141691	0.28897
ENSSSCG00000000138	ENSMUSG00000005716	0.0613	0.4264	0.143762	0.284405
ENSSSCG00000000175	ENSMUSG00000022994	0.0289	0.831	0.0347774	0.3138
ENSSSCG00000000236	ENSMUSG00000022986	0.0783	1.1169	0.0701048	0.39045
ENSSSCG00000000242	ENSMUSG00000029380	0.2312	0.8451	0.273577	1.93464
ENSSSCG00000000242	ENSMUSG00000029379	0.3296	0.6798	0.484848	0.36895
ENSSSCG00000000242	ENSMUSG00000058427	0.8728	0.5962	1.46394	2.3351
ENSSSCG00000000248	ENSMUSG00000061527	0.0531	0.6354	0.0835694	0.36915
ENSSSCG00000000281	ENSMUSG00000050328	0.017	0.5436	0.031273	0.33085
ENSSSCG00000000324	ENSMUSG00000049894	0.0816	0.8926	0.0914183	0.288185
ENSSSCG00000000359	ENSMUSG00000090247	0.0034	0.4445	0.00764904	0.31495
ENSSSCG00000000478	ENSMUSG00000034813	0.0253	0.543	0.046593	0.3259
ENSSSCG00000000515	ENSMUSG00000050663	0.0353	0.4607	0.0766225	0.2721
ENSSSCG00000000550	ENSMUSG00000030292	0.4055	0.9037	0.448711	0.2275
ENSSSCG00000000604	ENSMUSG00000030220	0.0457	0.9193	0.0497117	0.56245
ENSSSCG00000000619	ENSMUSG00000030207	0.0996	0.7688	0.129553	0.37595
ENSSSCG00000000635	ENSMUSG00000030188	0.0031	0.655	0.00473282	0.3001
ENSSSCG00000000641	ENSMUSG00000030149	0.2993	0.947	0.316051	0.41165
ENSSSCG00000000643	ENSMUSG00000030160	0.8144	0.7237	1.12533	0.20545
ENSSSCG00000000648	ENSMUSG00000079293	0.3798	0.7266	0.522709	0.7446
ENSSSCG00000000668	ENSMUSG00000040613	0.2305	0.7655	0.30111	0.5707
ENSSSCG00000000719	ENSMUSG00000000399	0.1477	0.8625	0.171246	0.3142
ENSSSCG00000000789	ENSMUSG00000055022	0.0367	0.8233	0.0445767	0.69775
ENSSSCG00000000857	ENSMUSG00000020053	0.0936	0.6256	0.149616	0.609
ENSSSCG00000000919	ENSMUSG00000047025	0.2331	0.826	0.282203	0.6852
ENSSSCG00000000961	ENSMUSG00000022613	0.0815	1.0584	0.077003	0.74615
ENSSSCG00000001021	ENSMUSG00000039087	0.1268	1.1456	0.110684	0.628
ENSSSCG00000001049	ENSMUSG00000021366	0.1998	0.8245	0.242329	0.76665
ENSSSCG00000001083	ENSMUSG00000045835	0.4292	5.6065	0.076554	0.3658
ENSSSCG00000001085	ENSMUSG00000035910	0.8191	0.6988	1.17215	0.65755
ENSSSCG00000001236	ENSMUSG00000073399	0.3017	1.0076	0.299424	0.6445
ENSSSCG00000001252	ENSMUSG00000035186	0.2282	0.7861	0.290294	0.64365
ENSSSCG00000001258	ENSMUSG00000061972	0.1884	0.7904	0.23836	0.62875
ENSSSCG00000001258	ENSMUSG00000059687	0.1803	0.7175	0.251289	0.6323
ENSSSCG00000001258	ENSMUSG00000058802	0.1688	0.8353	0.202083	0.7945
ENSSSCG00000001258	ENSMUSG00000063188	0.2039	0.7402	0.275466	0.36805
ENSSSCG00000001258	ENSMUSG00000063660	0.1724	0.6856	0.251459	0.7138
ENSSSCG00000001294	ENSMUSG00000059964	0.1082	0.661	0.163691	0.6655
ENSSSCG00000001294	ENSMUSG00000080990	0.8155	0.7074	1.15281	1.93015
ENSSSCG00000001294	ENSMUSG00000083947	0.1032	0.6824	0.151231	0.6549
ENSSSCG00000001294	ENSMUSG00000060017	0.1081	0.658	0.164286	0.6128
ENSSSCG00000001294	ENSMUSG00000063994	0.1214	0.7095	0.171106	0.36385
ENSSSCG00000001294	ENSMUSG00000081724	0.1026	0.6534	0.157025	0.7315
ENSSSCG00000001342	ENSMUSG00000045409	0.0116	0.4701	0.0246756	0.282835
ENSSSCG00000001370	ENSMUSG00000038762	0.1308	1.0196	0.128286	0.28539
ENSSSCG00000001376	ENSMUSG00000024422	0.0214	0.6857	0.031209	0.35355
ENSSSCG00000001394	ENSMUSG00000040987	0.771	1.5674	0.491897	0.32415
ENSSSCG00000001394	ENSMUSG00000054005	0.7452	1.6131	0.461968	0.28954
ENSSSCG00000001410	ENSMUSG00000024392	0.0317	0.4636	0.0683779	0.28176
ENSSSCG00000001411	ENSMUSG00000024391	0.0811	0.5336	0.151987	0.3621
ENSSSCG00000001413	ENSMUSG00000092417	0.1456	0.6241	0.233296	0.3672
ENSSSCG00000001414	ENSMUSG00000024387	0.3131	1.4903	0.210092	0.28854
ENSSSCG00000001423	ENSMUSG00000024369	0.0283	0.6777	0.0417589	0.28563
ENSSSCG00000001433	ENSMUSG00000015474	0.0385	0.5892	0.0653428	0.288725
ENSSSCG00000001435	ENSMUSG00000034254	0.0341	0.5344	0.0638099	0.3008
ENSSSCG00000001437	ENSMUSG00000015452	0.1414	0.6364	0.222187	0.288795
ENSSSCG00000001444	ENSMUSG00000057246	1.2781	2.1558	0.592866	0.2841
ENSSSCG00000001476	ENSMUSG00000073422	0.0837	0.4393	0.19053	0.281125
ENSSSCG00000001651	ENSMUSG00000023973	0.0631	0.9865	0.0639635	0.3905
ENSSSCG00000001703	ENSMUSG00000023947	0.1069	0.8248	0.129607	0.28961
ENSSSCG00000001739	ENSMUSG00000025774	0.3236	1.0741	0.301275	0.66175
ENSSSCG00000001745	ENSMUSG00000043760	0.2744	0.5535	0.495754	0.60505
ENSSSCG00000001749	ENSMUSG00000041872	0.151	0.6754	0.223571	0.6179
ENSSSCG00000001750	ENSMUSG00000025931	0.0531	1.7927	0.0296201	0.51315
ENSSSCG00000001787	ENSMUSG00000001741	0.1492	0.7736	0.192865	0.6661
ENSSSCG00000001790	ENSMUSG00000035674	0.2332	0.8656	0.269409	0.1632
ENSSSCG00000001830	ENSMUSG00000068566	0.2783	1.5708	0.177171	0.32245
ENSSSCG00000001831	ENSMUSG00000068566	0.3154	1.603	0.196756	0.38865
ENSSSCG00000001832	ENSMUSG00000030607	0.1398	0.5681	0.246083	0.34045
ENSSSCG00000001993	ENSMUSG00000022218	0.0517	0.7035	0.0734897	0.22245
ENSSSCG00000002045	ENSMUSG00000028081	0.0312	0.8277	0.0376948	0.2363
ENSSSCG00000002251	ENSMUSG00000041255	0.1861	0.6575	0.283042	0.1437
ENSSSCG00000002285	ENSMUSG00000047454	0.0073	0.2751	0.0265358	0.2078
ENSSSCG00000002479	ENSMUSG00000063232	0.1545	0.8106	0.1906	0.3292
ENSSSCG00000002481	ENSMUSG00000041550	0.2788	1.2835	0.217219	0.2026
ENSSSCG00000002505	ENSMUSG00000021111	0.0226	0.2254	0.100266	0.1077
ENSSSCG00000002542	ENSMUSG00000075707	0.0311	1.4832	0.0209682	0.6036
ENSSSCG00000002555	ENSMUSG00000002799	0.0529	0.9688	0.0546036	0.6019
ENSSSCG00000002696	ENSMUSG00000046844	0.0165	0.7268	0.0227023	0.66185
ENSSSCG00000002700	ENSMUSG00000033409	0.4018	1.6589	0.242209	0.66855
ENSSSCG00000002706	ENSMUSG00000031949	0.1354	0.586	0.231058	0.7378
ENSSSCG00000002762	ENSMUSG00000031921	0.1311	0.4379	0.299383	0.34775
ENSSSCG00000002776	ENSMUSG00000013160	0.0013	0.812	0.00160099	0
ENSSSCG00000002778	ENSMUSG00000039199	0.0735	0.548	0.134124	0.6505
ENSSSCG00000002863	ENSMUSG00000001802	0.0419	0.9565	0.0438055	0.78145
ENSSSCG00000002883	ENSMUSG00000060962	0.4307	0.8273	0.520609	0.7882
ENSSSCG00000002886	ENSMUSG00000050440	0.4214	1.2544	0.335938	0.7613
ENSSSCG00000002886	ENSMUSG00000056978	0.4775	1.1809	0.404353	0.34885
ENSSSCG00000002893	ENSMUSG00000030577	0.7732	2.0554	0.37618	0.28617
ENSSSCG00000002917	ENSMUSG00000036931	0.0804	0.6218	0.129302	0.284755
ENSSSCG00000002918	ENSMUSG00000064109	0.1631	0.5125	0.318244	0.284835
ENSSSCG00000002950	ENSMUSG00000030583	0.0366	0.9332	0.0392199	0.28988
ENSSSCG00000003068	ENSMUSG00000002210	0.0202	0.9848	0.0205118	0.28621
ENSSSCG00000003119	ENSMUSG00000078796	0.1689	1.1832	0.142748	0.282605
ENSSSCG00000003120	ENSMUSG00000006024	0.0058	0.9872	0.0058752	0.30085
ENSSSCG00000003219	ENSMUSG00000051113	0.1287	0.8264	0.155736	0.31175
ENSSSCG00000003222	ENSMUSG00000030731	0.0165	0.8015	0.0205864	0
ENSSSCG00000003226	ENSMUSG00000051504	0.3702	0.9444	0.391995	0.28711
ENSSSCG00000003226	ENSMUSG00000004609	0.4816	1.9153	0.251449	0.280485
ENSSSCG00000003250	ENSMUSG00000054753	0.2176	0.8964	0.242749	1.93146
ENSSSCG00000003338	ENSMUSG00000051557	0.1213	0.9668	0.125465	0.28863
ENSSSCG00000003428	ENSMUSG00000029009	0.0573	0.9192	0.0623368	0
ENSSSCG00000003440	ENSMUSG00000028593	0.2946	1.1356	0.259422	0.35815
ENSSSCG00000003440	ENSMUSG00000078505	0.2699	1.2003	0.22486	0.28805
ENSSSCG00000003440	ENSMUSG00000078506	0.3149	1.1191	0.281387	0.37255
ENSSSCG00000003440	ENSMUSG00000070609	0.266	0.979	0.271706	0.28976
ENSSSCG00000003440	ENSMUSG00000041735	0.2676	1.0777	0.248307	0.284465
ENSSSCG00000003440	ENSMUSG00000078504	0.2745	0.9684	0.283457	0.3151
ENSSSCG00000003441	ENSMUSG00000078507	0.8722	1.1793	0.739591	0.3825
ENSSSCG00000003451	ENSMUSG00000028583	0.5507	0.9068	0.6073	0.3122
ENSSSCG00000003459	ENSMUSG00000058579	0.1747	0.8903	0.196226	0
ENSSSCG00000003460	ENSMUSG00000028914	0.1381	0.6078	0.227213	0.28664
ENSSSCG00000003481	ENSMUSG00000025329	0.1226	1.1429	0.107271	0.3237
ENSSSCG00000003503	ENSMUSG00000028753	0.1952	0.9296	0.209983	0.280835
ENSSSCG00000003553	ENSMUSG00000046671	0.0253	0.3918	0.0645738	0.28661
ENSSSCG00000003577	ENSMUSG00000028868	0.0739	0.4479	0.164992	0.28691
ENSSSCG00000003586	ENSMUSG00000028906	0.048	0.5355	0.0896359	0.287245
ENSSSCG00000003775	ENSMUSG00000038975	0.0591	1.0534	0.056104	0.38735
ENSSSCG00000003779	ENSMUSG00000047583	0.3127	1.012	0.308992	0.284585
ENSSSCG00000003783	ENSMUSG00000053870	0.1639	0.6938	0.236235	0.28564
ENSSSCG00000003799	ENSMUSG00000018341	0.2386	0.574	0.415679	0.68935
ENSSSCG00000003801	ENSMUSG00000049093	0.2181	0.6419	0.339773	0.69185
ENSSSCG00000003802	ENSMUSG00000028521	0.0336	0.318	0.10566	0.3602
ENSSSCG00000003824	ENSMUSG00000082932	0.2921	0.938	0.311407	0.7406
ENSSSCG00000003824	ENSMUSG00000015224	0.2493	0.7669	0.325075	0.3565
ENSSSCG00000003824	ENSMUSG00000028571	0.2634	0.858	0.306993	0.7831
ENSSSCG00000003824	ENSMUSG00000081362	0.2911	0.826	0.352421	0.60725
ENSSSCG00000003824	ENSMUSG00000066097	0.3145	0.819	0.384005	0.33155
ENSSSCG00000003824	ENSMUSG00000081225	0.2793	0.7532	0.370818	0.69345
ENSSSCG00000003824	ENSMUSG00000052914	0.2521	0.8031	0.313909	0.62565
ENSSSCG00000003824	ENSMUSG00000052520	0.3211	0.9236	0.347661	0.667
ENSSSCG00000003825	ENSMUSG00000082932	0.2203	0.9648	0.228337	0.76945
ENSSSCG00000003825	ENSMUSG00000015224	0.1919	0.6628	0.289529	0.38435
ENSSSCG00000003825	ENSMUSG00000028571	0.1892	0.8548	0.221338	0.78965
ENSSSCG00000003825	ENSMUSG00000081362	0.2112	0.8365	0.252481	0.3019
ENSSSCG00000003825	ENSMUSG00000066097	0.2362	0.9025	0.261717	0.78245
ENSSSCG00000003825	ENSMUSG00000081225	0.2108	0.8136	0.259095	0.6045
ENSSSCG00000003825	ENSMUSG00000052914	0.188	0.7629	0.246428	0
ENSSSCG00000003825	ENSMUSG00000052520	0.2418	0.8763	0.275933	0.33985
ENSSSCG00000003908	ENSMUSG00000028699	0.1374	0.7699	0.178465	0.38655
ENSSSCG00000003970	ENSMUSG00000032978	0.1542	1.0293	0.149811	0.6692
ENSSSCG00000004169	ENSMUSG00000019977	0.0647	0.6016	0.107547	0.3295
ENSSSCG00000004189	ENSMUSG00000037424	0.0609	0.7833	0.077748	0.66915
ENSSSCG00000004190	ENSMUSG00000019998	0.0326	0.675	0.0482963	0.63875
ENSSSCG00000004244	ENSMUSG00000003746	0.0824	0.5463	0.150833	0.696
ENSSSCG00000004270	ENSMUSG00000033569	0.0121	0.4579	0.026425	0.37445
ENSSSCG00000004284	ENSMUSG00000092310	0.4799	1.7284	0.277656	0.78955
ENSSSCG00000004284	ENSMUSG00000092622	0.4799	1.7284	0.277656	0.39195
ENSSSCG00000004357	ENSMUSG00000019913	0.0231	0.5946	0.0388496	0.74555
ENSSSCG00000004361	ENSMUSG00000056073	0.0042	0.4132	0.0101646	0.3459
ENSSSCG00000004366	ENSMUSG00000071317	0.0804	0.5653	0.142225	0.6036
ENSSSCG00000004421	ENSMUSG00000019843	0.0034	0.4286	0.0079328	0.3453
ENSSSCG00000004468	ENSMUSG00000032261	0.1393	1.763	0.079013	0.7213
ENSSSCG00000004477	ENSMUSG00000032343	0.3428	0.872	0.393119	0.66995
ENSSSCG00000004486	ENSMUSG00000049624	0.0936	0.5979	0.156548	0.62625
ENSSSCG00000004520	ENSMUSG00000024558	0.0319	0.8925	0.0357423	0.3231
ENSSSCG00000004747	ENSMUSG00000027304	0.0738	0.6003	0.122939	0.39
ENSSSCG00000004898	ENSMUSG00000026321	0.2416	0.9186	0.263009	0.685
ENSSSCG00000004910	ENSMUSG00000024518	0.0821	1.0993	0.0746839	0.38395
ENSSSCG00000004934	ENSMUSG00000032393	0.0243	0.4422	0.0549525	0.78875
ENSSSCG00000004961	ENSMUSG00000032243	0.0414	0.8865	0.0467005	0.7246
ENSSSCG00000004979	ENSMUSG00000039585	0.8133	0.5011	1.62303	0.68585
ENSSSCG00000005078	ENSMUSG00000034574	0.0157	0.5095	0.0308145	0.33065
ENSSSCG00000005118	ENSMUSG00000056223	0.6504	0.8768	0.741788	0.35825
ENSSSCG00000005119	ENSMUSG00000028575	0.4685	0.7778	0.60234	0.3614
ENSSSCG00000005121	ENSMUSG00000028575	0.4619	0.7439	0.620917	0.62585
ENSSSCG00000005194	ENSMUSG00000028399	0.012	0.4025	0.0298137	0.3484
ENSSSCG00000005207	ENSMUSG00000046324	0.0923	0.6206	0.148727	0.73185
ENSSSCG00000005211	ENSMUSG00000016496	0.2237	0.8493	0.263393	0.34715
ENSSSCG00000005225	ENSMUSG00000040929	0.0119	0.3863	0.0308051	0.602315
ENSSSCG00000005229	ENSMUSG00000024924	0.0208	0.5008	0.0415335	0.6895
ENSSSCG00000005310	ENSMUSG00000028458	0.0319	0.4087	0.0780524	0.39875
ENSSSCG00000005370	ENSMUSG00000028331	0.2338	0.7885	0.296512	0.3424
ENSSSCG00000005459	ENSMUSG00000050812	0.02	0.4479	0.0446528	0.6776
ENSSSCG00000005462	ENSMUSG00000038607	0.0835	0.4021	0.20766	1.93171
ENSSSCG00000005464	ENSMUSG00000028381	0.0432	0.5719	0.0755377	0.0631
ENSSSCG00000005484	ENSMUSG00000028358	0.0304	0.9118	0.0333406	0.7345
ENSSSCG00000005501	ENSMUSG00000051675	0.0224	0.9303	0.0240783	0.394
ENSSSCG00000005549	ENSMUSG00000078198	0.0708	0.7949	0.0890678	0.61425
ENSSSCG00000005549	ENSMUSG00000059429	0.0717	0.784	0.0914541	0.35295
ENSSSCG00000005593	ENSMUSG00000046618	0.0842	1.2627	0.0666825	0.6297
ENSSSCG00000005656	ENSMUSG00000054766	0.029	0.5113	0.0567182	0.6114
ENSSSCG00000005657	ENSMUSG00000026785	0.1214	1.076	0.112825	0.38865
ENSSSCG00000005757	ENSMUSG00000023210	0.3955	1.4439	0.273911	0.7721
ENSSSCG00000005768	ENSMUSG00000090000	0.0121	0.3099	0.0390449	0.72203
ENSSSCG00000005768	ENSMUSG00000094886	0.0601	0.2939	0.204491	0.74
ENSSSCG00000005791	ENSMUSG00000075093	0.1537	0.6782	0.226629	0.629
ENSSSCG00000005874	ENSMUSG00000068947	0.1033	0.7849	0.131609	0.66245
ENSSSCG00000005899	ENSMUSG00000019080	0.2031	1.0976	0.18504	0.30735
ENSSSCG00000005906	ENSMUSG00000034022	0.018	1.4969	0.0120249	0.6105
ENSSSCG00000005934	ENSMUSG00000047921	0.0661	1.4392	0.0459283	0.38705
ENSSSCG00000005967	ENSMUSG00000072568	0.0264	0.9328	0.0283019	0.37445
ENSSSCG00000005969	ENSMUSG00000022350	0.1621	0.7995	0.202752	0.6091
ENSSSCG00000005977	ENSMUSG00000062373	0.0311	0.2608	0.119248	1.93133
ENSSSCG00000006003	ENSMUSG00000024479	0.0653	0.6996	0.0933391	0.3552
ENSSSCG00000006059	ENSMUSG00000051359	0	0	0	0
ENSSSCG00000006061	ENSMUSG00000062397	0	0	0	0
ENSSSCG00000006105	ENSMUSG00000028214	0.0193	0.7874	0.024511	0.60745
ENSSSCG00000006160	ENSMUSG00000027500	0	0	0	0
ENSSSCG00000006161	ENSMUSG00000040329	0.1662	0.5746	0.289245	0.3278
ENSSSCG00000006203	ENSMUSG00000025917	0.0027	0.4396	0.00614195	0.60445
ENSSSCG00000006213	ENSMUSG00000025911	0.0505	0.492	0.102642	0.69295
ENSSSCG00000006215	ENSMUSG00000049796	0.1099	0.8723	0.125989	0.78605
ENSSSCG00000006328	ENSMUSG00000015843	0.0088	0.6195	0.014205	0.6972
ENSSSCG00000006381	ENSMUSG00000038147	0.4468	0.5942	0.751935	0.7967
ENSSSCG00000006398	ENSMUSG00000053318	0.1715	0.7313	0.234514	0.6824
ENSSSCG00000006422	ENSMUSG00000045381	0.1214	0.8266	0.146867	0.7814
ENSSSCG00000006423	ENSMUSG00000050134	0.0613	0.5362	0.114323	1.90539
ENSSSCG00000006425	ENSMUSG00000046486	0.066	0.5674	0.11632	0.36245
ENSSSCG00000006428	ENSMUSG00000051528	0.128	1.6063	0.0796862	0.35425
ENSSSCG00000006525	ENSMUSG00000042784	0.6122	0.9653	0.634207	0.68645
ENSSSCG00000006529	ENSMUSG00000027953	0.1353	0.6494	0.208346	1.9316
ENSSSCG00000006578	ENSMUSG00000001020	0.035	1.0024	0.0349162	0.3478
ENSSSCG00000006581	ENSMUSG00000074457	0.0335	1.2789	0.0261944	0.6058
ENSSSCG00000006582	ENSMUSG00000042306	0.0432	0.8049	0.0536713	0.6521
ENSSSCG00000006610	ENSMUSG00000027907	0.0795	0.8872	0.0896078	0.76375
ENSSSCG00000006618	ENSMUSG00000028137	0.0136	0.3324	0.0409146	0.74175
ENSSSCG00000006703	ENSMUSG00000038205	0.013	0.4074	0.0319097	0.6538
ENSSSCG00000006713	ENSMUSG00000043468	0.3092	0.9937	0.31116	0.6043
ENSSSCG00000006725	ENSMUSG00000027868	0.0031	0.4356	0.00711662	0.68835
ENSSSCG00000006852	ENSMUSG00000059857	0.0244	0.4086	0.0597161	0.71775
ENSSSCG00000006911	ENSMUSG00000029287	0.1242	0.608	0.204276	0.65505
ENSSSCG00000006939	ENSMUSG00000074182	0.2269	0.8745	0.259463	0.69485
ENSSSCG00000007100	ENSMUSG00000063873	0.0141	0.6974	0.020218	0.39935
ENSSSCG00000007112	ENSMUSG00000037034	0.0634	0.7892	0.0803345	0.65305
ENSSSCG00000007122	ENSMUSG00000036958	0.3558	1.7086	0.208241	0.3313
ENSSSCG00000007153	ENSMUSG00000027312	0.0412	0.4	0.103	0.30285
ENSSSCG00000007183	ENSMUSG00000043727	0.495	0.6524	0.758737	0.62175
ENSSSCG00000007187	ENSMUSG00000027455	0.0125	0.3618	0.0345495	0.547
ENSSSCG00000007198	ENSMUSG00000027460	0.196	1.3694	0.143128	0.78365
ENSSSCG00000007219	ENSMUSG00000062124	0.3079	0.7244	0.425041	1.93154
ENSSSCG00000007260	ENSMUSG00000027484	0.3786	0.5012	0.755387	0.74085
ENSSSCG00000007260	ENSMUSG00000027483	0.257	0.5005	0.513487	0.35095
ENSSSCG00000007261	ENSMUSG00000027485	0.3451	0.9454	0.365031	0.3817
ENSSSCG00000007263	ENSMUSG00000067998	0.5557	1.0483	0.530096	0.6423
ENSSSCG00000007263	ENSMUSG00000067996	0.5534	1.0689	0.517729	0.3224
ENSSSCG00000007368	ENSMUSG00000074607	0.0416	0.6574	0.0632796	1.95284
ENSSSCG00000007430	ENSMUSG00000039873	0.0669	0.9857	0.0678705	1.93164
ENSSSCG00000007440	ENSMUSG00000017652	0.3155	1.0493	0.300677	0.7787
ENSSSCG00000007448	ENSMUSG00000027670	0.2431	0.8901	0.273115	0.6589
ENSSSCG00000007451	ENSMUSG00000027661	0.1734	0.8247	0.210258	0.3314
ENSSSCG00000007473	ENSMUSG00000051149	0.0289	0.5063	0.0570808	0.69105
ENSSSCG00000007474	ENSMUSG00000078919	0.0474	0.5246	0.0903546	0.62375
ENSSSCG00000007474	ENSMUSG00000093752	0.0474	0.5246	0.0903546	0.7987
ENSSSCG00000007481	ENSMUSG00000027551	0.0596	1.3265	0.0449303	0.66345
ENSSSCG00000007482	ENSMUSG00000047907	0.0569	0.9063	0.0627827	0.61995
ENSSSCG00000007492	ENSMUSG00000027495	0.157	1.0449	0.150254	0.7829
ENSSSCG00000007493	ENSMUSG00000027496	0.0943	1.1704	0.0805707	0.7714
ENSSSCG00000007495	ENSMUSG00000074570	0.3314	1.4534	0.228017	0.69355
ENSSSCG00000007496	ENSMUSG00000027502	0.0661	0.8398	0.0787092	0.7035
ENSSSCG00000007503	ENSMUSG00000027509	0.0036	0.786	0.00458015	0.78265
ENSSSCG00000007507	ENSMUSG00000027513	0.0708	1.3451	0.0526355	0.75225
ENSSSCG00000007520	ENSMUSG00000027523	0.1762	0.473	0.372516	0.7026
ENSSSCG00000007538	ENSMUSG00000015627	0.8197	1.3576	0.603786	0.75045
ENSSSCG00000007540	ENSMUSG00000038990	0.1214	1.4396	0.084329	0.61535
ENSSSCG00000007646	ENSMUSG00000050552	0.0153	0.7112	0.0215129	0.7369
ENSSSCG00000007718	ENSMUSG00000047501	0.0727	1.6822	0.0432172	0.7472
ENSSSCG00000007774	ENSMUSG00000042340	0.1424	0.8539	0.166764	0.73885
ENSSSCG00000007776	ENSMUSG00000030814	0.0264	0.4239	0.0622788	0.6188
ENSSSCG00000007830	ENSMUSG00000030779	0.0719	0.6713	0.107106	0
ENSSSCG00000007864	ENSMUSG00000008734	0.0957	0.8498	0.112615	0.6874
ENSSSCG00000007954	ENSMUSG00000039738	0.3395	0.9014	0.376636	0.32775
ENSSSCG00000007962	ENSMUSG00000040767	0.0149	0.9124	0.0163306	0.66445
ENSSSCG00000007978	ENSMUSG00000069919	0.0977	0.7783	0.12553	0.63335
ENSSSCG00000007978	ENSMUSG00000069917	0.098	0.7898	0.124082	0.6443
ENSSSCG00000008003	ENSMUSG00000061046	0.1057	1.5544	0.0680005	0.65725
ENSSSCG00000008054	ENSMUSG00000036473	0.0562	0.8327	0.0674913	0.70945
ENSSSCG00000008111	ENSMUSG00000027378	0.1234	0.7077	0.174368	0.62355
ENSSSCG00000008185	ENSMUSG00000026088	0.0935	0.6827	0.136956	0.7035
ENSSSCG00000008193	ENSMUSG00000026117	0.0339	1.018	0.0333006	0.6433
ENSSSCG00000008194	ENSMUSG00000037351	0.0062	0.6348	0.00976686	0.34005
ENSSSCG00000008205	ENSMUSG00000076523	0.2263	0.7115	0.31806	2.1251
ENSSSCG00000008205	ENSMUSG00000096490	0.8787	0.6141	1.43087	2.1272
ENSSSCG00000008205	ENSMUSG00000095737	0.2672	0.3827	0.698197	0.6076
ENSSSCG00000008205	ENSMUSG00000094345	0.3162	0.5593	0.56535	0.3697
ENSSSCG00000008205	ENSMUSG00000076512	0.3	0.6461	0.464324	0.74275
ENSSSCG00000008205	ENSMUSG00000096422	0.2355	0.869	0.271001	0.76895
ENSSSCG00000008205	ENSMUSG00000098814	0.248	0.8846	0.280353	0.3357
ENSSSCG00000008205	ENSMUSG00000095771	0.3458	0.4761	0.726318	0.65725
ENSSSCG00000008205	ENSMUSG00000093906	0.3285	0.6097	0.53879	0.6043
ENSSSCG00000008205	ENSMUSG00000094420	0.3006	0.7399	0.406271	0.3413
ENSSSCG00000008205	ENSMUSG00000094902	0.3181	0.6996	0.454688	0.34115
ENSSSCG00000008205	ENSMUSG00000096461	0.319	0.6093	0.523552	0.7828
ENSSSCG00000008205	ENSMUSG00000096632	0.3448	0.6658	0.517873	0.36755
ENSSSCG00000008205	ENSMUSG00000094872	0.3527	0.6302	0.559664	0.3565
ENSSSCG00000008208	ENSMUSG00000031668	0.0762	0.8013	0.0950955	0.7648
ENSSSCG00000008250	ENSMUSG00000063063	0	0	0	0
ENSSSCG00000008281	ENSMUSG00000034930	0.1682	0.7033	0.239158	1.94361
ENSSSCG00000008385	ENSMUSG00000020280	0.0742	0.4555	0.162898	0.691
ENSSSCG00000008456	ENSMUSG00000040852	0.0852	0.7738	0.110106	0.76325
ENSSSCG00000008533	ENSMUSG00000055471	0.0584	0.7432	0.0785791	0.789
ENSSSCG00000008545	ENSMUSG00000062761	0.0646	0.5603	0.115295	0.65385
ENSSSCG00000008601	ENSMUSG00000020592	0.2317	0.7756	0.298736	0.7416
ENSSSCG00000008720	ENSMUSG00000067438	0.0751	1.1803	0.0636279	0.7839
ENSSSCG00000008721	ENSMUSG00000029095	0.0762	0.8626	0.0883376	0.6561
ENSSSCG00000008742	ENSMUSG00000029084	0.3941	0.8927	0.44147	0.67595
ENSSSCG00000008769	ENSMUSG00000018774	0.3395	0.8519	0.398521	0.6824
ENSSSCG00000008820	ENSMUSG00000029217	0.0232	0.5451	0.042561	0.3141
ENSSSCG00000008824	ENSMUSG00000063935	0.3364	1.3708	0.245404	0.74755
ENSSSCG00000008833	ENSMUSG00000029156	0.0243	0.9517	0.0255333	0.33485
ENSSSCG00000008866	ENSMUSG00000033910	0.0669	1.0596	0.063137	0.79395
ENSSSCG00000008909	ENSMUSG00000029238	0.0229	0.3509	0.0652608	0.6929
ENSSSCG00000008933	ENSMUSG00000035861	0.1082	0.6018	0.179794	0.3372
ENSSSCG00000008994	ENSMUSG00000033882	0.0276	0.8088	0.0341246	0.78315
ENSSSCG00000008995	ENSMUSG00000028003	0.1063	1.1131	0.0954991	0.36995
ENSSSCG00000009079	ENSMUSG00000060798	0.122	0.6818	0.178938	0.663
ENSSSCG00000009087	ENSMUSG00000027718	0.254	0.6405	0.396565	0.7502
ENSSSCG00000009088	ENSMUSG00000027720	0.3592	0.7844	0.45793	0.31535
ENSSSCG00000009090	ENSMUSG00000037270	0.0176	0.5162	0.0340953	0.78895
ENSSSCG00000009197	ENSMUSG00000071424	0.0153	0.4082	0.0374816	0.60505
ENSSSCG00000009259	ENSMUSG00000055725	0.0137	0.5865	0.0233589	0.69965
ENSSSCG00000009268	ENSMUSG00000021947	0.8172	1.3568	0.6023	0.70815
ENSSSCG00000009313	ENSMUSG00000053129	0.0211	1.0968	0.0192378	0.75065
ENSSSCG00000009316	ENSMUSG00000075543	0.1267	1.2355	0.10255	0
ENSSSCG00000009319	ENSMUSG00000029647	0.0354	0.3829	0.0924523	0.3322
ENSSSCG00000009422	ENSMUSG00000022010	0.2283	0.7086	0.322185	0.3629
ENSSSCG00000009471	ENSMUSG00000022125	0.1487	0.7201	0.206499	0.6055
ENSSSCG00000009563	ENSMUSG00000038497	0.0854	1.5556	0.0548984	0.6523
ENSSSCG00000009609	ENSMUSG00000022101	0.0298	1.0548	0.0282518	0.32115
ENSSSCG00000009610	ENSMUSG00000047911	0.2487	0.8949	0.277908	0.3658
ENSSSCG00000009652	ENSMUSG00000034327	0.0097	0.4507	0.0215221	0.3476
ENSSSCG00000009698	ENSMUSG00000038257	0.0088	0.7205	0.0122137	0.68205
ENSSSCG00000009738	ENSMUSG00000033316	0.0374	1.1217	0.0333422	1.93105
ENSSSCG00000009798	ENSMUSG00000029431	0.1431	0.6779	0.211093	0.7964
ENSSSCG00000009817	ENSMUSG00000029468	0.1229	0.7115	0.172734	0.6566
ENSSSCG00000009839	ENSMUSG00000029516	0.0114	0.6798	0.0167696	1.90316
ENSSSCG00000009876	ENSMUSG00000029599	0.8149	1.0933	0.745358	0.7328
ENSSSCG00000009996	ENSMUSG00000034394	0.1291	0.9575	0.13483	0.6895
ENSSSCG00000010056	ENSMUSG00000006345	0.1216	0.9204	0.132116	0.69165
ENSSSCG00000010114	ENSMUSG00000003527	0.0444	0.7891	0.0562666	0.34615
ENSSSCG00000010128	ENSMUSG00000072214	0.0298	1.38	0.0215942	0.7599
ENSSSCG00000010146	ENSMUSG00000057554	0.1235	0.7413	0.166599	0.604
ENSSSCG00000010148	ENSMUSG00000057069	0.0171	0.6647	0.0257259	0.62475
ENSSSCG00000010298	ENSMUSG00000039543	0.8151	0.6514	1.2513	0.7847
ENSSSCG00000010330	ENSMUSG00000021868	0.0417	0.5559	0.0750135	0.35255
ENSSSCG00000010331	ENSMUSG00000021866	0.0239	0.5036	0.0474583	0.7482
ENSSSCG00000010350	ENSMUSG00000021804	0.1223	0.783	0.156194	0.69
ENSSSCG00000010359	ENSMUSG00000021798	0.0519	0.4838	0.107276	0.70435
ENSSSCG00000010385	ENSMUSG00000050666	0.0745	0.6112	0.121891	0.68215
ENSSSCG00000010400	ENSMUSG00000021907	0.5806	0.9729	0.596773	0.68275
ENSSSCG00000010411	ENSMUSG00000042129	0.8105	0.8892	0.911493	0.68695
ENSSSCG00000010475	ENSMUSG00000024987	0.0341	0.5951	0.0573013	0.3413
ENSSSCG00000010497	ENSMUSG00000048120	0.2638	0.6206	0.425073	0.66415
ENSSSCG00000010580	ENSMUSG00000025225	0.2312	1.1274	0.205074	0.692
ENSSSCG00000010608	ENSMUSG00000025066	0.3505	0.9766	0.358898	0.78925
ENSSSCG00000010626	ENSMUSG00000043639	0.1877	0.7523	0.249502	0.68115
ENSSSCG00000010702	ENSMUSG00000040268	0.1758	0.9323	0.188566	0.7655
ENSSSCG00000010707	ENSMUSG00000003437	0.0058	0.6021	0.00963295	0.65725
ENSSSCG00000010711	ENSMUSG00000059128	0.2738	0.7854	0.348612	0.68345
ENSSSCG00000010711	ENSMUSG00000060747	0.3137	0.812	0.38633	0.3859
ENSSSCG00000010734	ENSMUSG00000030934	0.0536	0.9198	0.0582735	0.69385
ENSSSCG00000010742	ENSMUSG00000030979	0.1233	0.6763	0.182316	0.7257
ENSSSCG00000010752	ENSMUSG00000048377	0.1718	0.9973	0.172265	0.78105
ENSSSCG00000010816	ENSMUSG00000039239	0.1062	0.8188	0.129702	0.68555
ENSSSCG00000010839	ENSMUSG00000026523	0.094	0.8502	0.110562	0.645
ENSSSCG00000010908	ENSMUSG00000026395	0.1087	0.7031	0.154601	0.3395
ENSSSCG00000010968	ENSMUSG00000073876	0.1031	0.5629	0.183159	0.65305
ENSSSCG00000010968	ENSMUSG00000073889	0.1002	0.5689	0.176129	0.349
ENSSSCG00000010968	ENSMUSG00000095623	0.1031	0.5629	0.183159	0.69845
ENSSSCG00000010968	ENSMUSG00000095456	0.1031	0.5629	0.183159	0.6014
ENSSSCG00000010968	ENSMUSG00000078735	0.1031	0.5629	0.183159	0.60415
ENSSSCG00000010972	ENSMUSG00000028447	0.0336	0.4508	0.0745342	0.3273
ENSSSCG00000011013	ENSMUSG00000024283	0.0215	0.3014	0.0713338	0.64245
ENSSSCG00000011106	ENSMUSG00000063889	0.068	0.4285	0.158693	0
ENSSSCG00000011141	ENSMUSG00000033765	0.2745	6.1068	0.0449499	0.3192
ENSSSCG00000011141	ENSMUSG00000099269	0.3344	7.6366	0.0437891	0.68615
ENSSSCG00000011256	ENSMUSG00000074028	0.2015	0.8365	0.240885	0.7618
ENSSSCG00000011270	ENSMUSG00000006941	0	0	0	0
ENSSSCG00000011300	ENSMUSG00000025785	0.0295	0.4919	0.0599715	0.32975
ENSSSCG00000011317	ENSMUSG00000025241	0.186	1.3827	0.134519	0.6264
ENSSSCG00000011363	ENSMUSG00000032601	0.0854	0.4515	0.189147	0.64275
ENSSSCG00000011386	ENSMUSG00000032591	0.8187	0.948	0.863608	0.65145
ENSSSCG00000011463	ENSMUSG00000040717	0.1788	1.0323	0.173205	0.60725
ENSSSCG00000011491	ENSMUSG00000053453	0.0106	0.563	0.0188277	0.71825
ENSSSCG00000011559	ENSMUSG00000030281	0.2014	0.6853	0.293886	1.92118
ENSSSCG00000011569	ENSMUSG00000056952	0.194	0.8281	0.234271	0.75385
ENSSSCG00000011592	ENSMUSG00000030123	0.0467	1.0585	0.044119	0.7354
ENSSSCG00000011657	ENSMUSG00000032473	0.0514	0.7015	0.0732716	0.60985
ENSSSCG00000011692	ENSMUSG00000032368	0.0037	0.877	0.00421893	0.7224
ENSSSCG00000011695	ENSMUSG00000049115	0.0322	0.6361	0.050621	0.604
ENSSSCG00000011695	ENSMUSG00000054988	0.0449	0.6965	0.0644652	0.39715
ENSSSCG00000011723	ENSMUSG00000027820	0.0318	0.4356	0.0730028	0.73495
ENSSSCG00000011725	ENSMUSG00000027823	0.0045	0.449	0.0100223	0.3939
ENSSSCG00000011743	ENSMUSG00000027684	0.8165	0.6716	1.21575	0.65445
ENSSSCG00000011795	ENSMUSG00000033581	0.0327	0.4426	0.0738816	0.68235
ENSSSCG00000011817	ENSMUSG00000038127	0.1208	0.7963	0.151702	0.3206
ENSSSCG00000011887	ENSMUSG00000034158	0.047	0.5497	0.0855012	0.67415
ENSSSCG00000011906	ENSMUSG00000022790	0.0497	0.6634	0.0749171	0.671
ENSSSCG00000011933	ENSMUSG00000022656	0.028	0.4411	0.0634777	0.69335
ENSSSCG00000011946	ENSMUSG00000022636	0.0308	0.4543	0.0677966	0.70275
ENSSSCG00000011968	ENSMUSG00000022751	0.1288	0.582	0.221306	0.38965
ENSSSCG00000012018	ENSMUSG00000022860	0.0443	0.6051	0.073211	0.7575
ENSSSCG00000012046	ENSMUSG00000051989	0.0984	1.0106	0.0973679	0.68695
ENSSSCG00000012102	ENSMUSG00000025246	0.0116	1.0254	0.0113127	0.3623
ENSSSCG00000012110	ENSMUSG00000035299	0.0266	0.6435	0.0413364	0.6218
ENSSSCG00000012123	ENSMUSG00000079316	0.029	0.5457	0.0531428	0.66635
ENSSSCG00000012125	ENSMUSG00000040586	0.238	0.8574	0.277583	0.6822
ENSSSCG00000012126	ENSMUSG00000031342	0.0081	0.5166	0.0156794	0.68595
ENSSSCG00000012130	ENSMUSG00000047757	0.4336	0.5604	0.773733	0.60585
ENSSSCG00000012131	ENSMUSG00000061778	0.0747	0.692	0.107948	0.6979
ENSSSCG00000012134	ENSMUSG00000031381	0.0707	0.3904	0.181096	0.61555
ENSSSCG00000012147	ENSMUSG00000040808	0.8104	1.2505	0.648061	0.6823
ENSSSCG00000012148	ENSMUSG00000031357	0.1069	0.795	0.134465	0.62925
ENSSSCG00000012151	ENSMUSG00000059493	0.0987	0.6668	0.14802	0.61725
ENSSSCG00000012155	ENSMUSG00000000037	0.2297	0.5945	0.386375	0.3512
ENSSSCG00000012161	ENSMUSG00000041020	0.1873	0.6867	0.272754	0.668
ENSSSCG00000012165	ENSMUSG00000046873	0.0223	0.376	0.0593085	0.7377
ENSSSCG00000012167	ENSMUSG00000057457	0.0334	0.4661	0.0716584	0.38095
ENSSSCG00000012172	ENSMUSG00000025287	0.1393	0.5005	0.278322	0.6926
ENSSSCG00000012172	ENSMUSG00000047565	0.1472	0.5509	0.267199	0.32375
ENSSSCG00000012199	ENSMUSG00000025056	0.1823	1.1528	0.158137	0.3871
ENSSSCG00000012219	ENSMUSG00000073077	0.2121	0.6532	0.324709	0.66715
ENSSSCG00000012220	ENSMUSG00000095413	0.4727	26.4364	0.0178806	0.60505
ENSSSCG00000012233	ENSMUSG00000054453	0.0986	0.5447	0.181017	0.64765
ENSSSCG00000012241	ENSMUSG00000040363	0.0647	0.6328	0.102244	0.6995
ENSSSCG00000012257	ENSMUSG00000025037	0.083	0.7544	0.110021	0.78335
ENSSSCG00000012262	ENSMUSG00000037369	0.0168	0.1868	0.0899358	0.6663
ENSSSCG00000012269	ENSMUSG00000031065	0.0122	0.4426	0.0275644	0.33785
ENSSSCG00000012280	ENSMUSG00000001134	0.0474	0.3884	0.122039	0.34545
ENSSSCG00000012287	ENSMUSG00000000134	0.0358	0.4531	0.0790113	0.68895
ENSSSCG00000012288	ENSMUSG00000031150	0.0679	0.5993	0.113299	0.31135
ENSSSCG00000012306	ENSMUSG00000050089	0.0882	0.4021	0.219348	0.37835
ENSSSCG00000012307	ENSMUSG00000051592	0.546	0.9359	0.583396	0.6467
ENSSSCG00000012317	ENSMUSG00000071723	0.0698	0.4315	0.161761	0.7674
ENSSSCG00000012327	ENSMUSG00000025260	0.0748	0.5092	0.146897	0.7701
ENSSSCG00000012334	ENSMUSG00000025264	0.1084	0.7035	0.154087	0.63375
ENSSSCG00000012345	ENSMUSG00000025271	0.0397	0.4462	0.0889736	0.65745
ENSSSCG00000012347	ENSMUSG00000025270	0.0623	0.5009	0.124376	1.90371
ENSSSCG00000012362	ENSMUSG00000025656	0.0061	0.409	0.0149144	0.78675
ENSSSCG00000012378	ENSMUSG00000015668	0.0033	0.4524	0.00729443	0.6814
ENSSSCG00000012381	ENSMUSG00000067597	0.2041	0.4973	0.410416	0.7474
ENSSSCG00000012384	ENSMUSG00000031220	0.133	0.5276	0.252085	0.7685
ENSSSCG00000012386	ENSMUSG00000071719	0.0335	0.258	0.129845	0.6155
ENSSSCG00000012394	ENSMUSG00000047797	0.0061	0.595	0.0102521	0.31285
ENSSSCG00000012403	ENSMUSG00000034160	0.0013	0.3976	0.00326962	0
ENSSSCG00000012434	ENSMUSG00000031229	0.0849	0.5565	0.152561	0.65595
ENSSSCG00000012440	ENSMUSG00000062070	0.0494	0.4503	0.109705	0.68165
ENSSSCG00000012440	ENSMUSG00000066632	0.0494	0.4503	0.109705	0.77055
ENSSSCG00000012448	ENSMUSG00000031239	0.0377	0.591	0.0637902	0.6071
ENSSSCG00000012456	ENSMUSG00000025665	0.0556	0.5127	0.108445	0.77575
ENSSSCG00000012459	ENSMUSG00000025525	0.1534	0.3949	0.388453	0.60085
ENSSSCG00000012463	ENSMUSG00000025531	0.0941	0.4938	0.190563	0.69835
ENSSSCG00000012485	ENSMUSG00000031257	0.1038	0.4793	0.216566	0.6556
ENSSSCG00000012491	ENSMUSG00000031262	0.1825	0.483	0.377847	0.37665
ENSSSCG00000012492	ENSMUSG00000000223	0.0274	0.4539	0.0603657	0.38175
ENSSSCG00000012494	ENSMUSG00000045455	0.0301	0.4467	0.067383	0.68685
ENSSSCG00000012494	ENSMUSG00000048007	0.0301	0.4467	0.067383	0.796
ENSSSCG00000012495	ENSMUSG00000031264	0.0075	0.4726	0.0158697	0.62795
ENSSSCG00000012508	ENSMUSG00000050394	0.2393	0.6715	0.356366	0.3114
ENSSSCG00000012509	ENSMUSG00000049047	0.0299	0.5784	0.0516943	0.36415
ENSSSCG00000012512	ENSMUSG00000052676	0.2536	0.5326	0.476155	0.3768
ENSSSCG00000012520	ENSMUSG00000072964	0.1897	0.5199	0.364878	0.62735
ENSSSCG00000012531	ENSMUSG00000054034	0.225	0.8229	0.273423	0.39535
ENSSSCG00000012531	ENSMUSG00000031409	0.1655	0.8005	0.206746	0.3779
ENSSSCG00000012531	ENSMUSG00000044550	0.1581	0.8676	0.182227	0.6833
ENSSSCG00000012534	ENSMUSG00000031422	0.0236	0.6529	0.0361464	0.6833
ENSSSCG00000012569	ENSMUSG00000087119	0.8179	0.5507	1.4852	0.30525
ENSSSCG00000012569	ENSMUSG00000079418	0.1303	0.5204	0.250384	0.6995
ENSSSCG00000012590	ENSMUSG00000041700	0.0257	0.382	0.0672775	0.64695
ENSSSCG00000012601	ENSMUSG00000079642	1.0957	4.2872	0.255575	0.6666
ENSSSCG00000012613	ENSMUSG00000016409	0.0449	0.4695	0.0956337	0.7951
ENSSSCG00000012619	ENSMUSG00000050379	0.0277	0.6815	0.0406456	0.68135
ENSSSCG00000012631	ENSMUSG00000016239	0.147	0.6977	0.210692	0.6829
ENSSSCG00000012638	ENSMUSG00000001986	0.0033	0.2428	0.0135914	0.66435
ENSSSCG00000012639	ENSMUSG00000079065	0.0525	0.4796	0.109466	0.6827
ENSSSCG00000012639	ENSMUSG00000037475	0.0179	0.335	0.0534328	0.62705
ENSSSCG00000012649	ENSMUSG00000031099	0.0241	0.4254	0.0566526	0.651
ENSSSCG00000012653	ENSMUSG00000036985	0.0139	0.3978	0.0349422	0.32385
ENSSSCG00000012657	ENSMUSG00000036932	0.0462	0.3262	0.141631	0.65575
ENSSSCG00000012660	ENSMUSG00000031105	0.0087	0.464	0.01875	0.6981
ENSSSCG00000012669	ENSMUSG00000036198	0.1373	0.4523	0.30356	0.6573
ENSSSCG00000012695	ENSMUSG00000035967	0.0651	0.3667	0.177529	0.7335
ENSSSCG00000012703	ENSMUSG00000037070	0.007	0.4646	0.0150667	0.77735
ENSSSCG00000012703	ENSMUSG00000101667	0.3295	1.424	0.23139	0.3725
ENSSSCG00000012703	ENSMUSG00000102053	0.3448	2.4069	0.143255	0.705
ENSSSCG00000012703	ENSMUSG00000093918	0.3453	2.4258	0.142345	1.93138
ENSSSCG00000012703	ENSMUSG00000094658	0.3451	2.3399	0.147485	0.3345
ENSSSCG00000012703	ENSMUSG00000096520	0.3377	2.4092	0.140171	0.62985
ENSSSCG00000012703	ENSMUSG00000095948	0.3451	2.3399	0.147485	0.77195
ENSSSCG00000012703	ENSMUSG00000095852	0.3426	2.3419	0.146291	0.6129
ENSSSCG00000012703	ENSMUSG00000093987	0.3453	2.4258	0.142345	0.6483
ENSSSCG00000012703	ENSMUSG00000094511	0.3475	2.3287	0.149225	0.767
ENSSSCG00000012703	ENSMUSG00000091987	0.3426	2.3419	0.146291	0.67555
ENSSSCG00000012718	ENSMUSG00000057615	0.1839	0.7853	0.234178	0.65195
ENSSSCG00000012724	ENSMUSG00000036790	0.0127	0.5062	0.0250889	0.6231
ENSSSCG00000012727	ENSMUSG00000000838	0.0193	0.2642	0.0730507	0.6244
ENSSSCG00000012743	ENSMUSG00000015214	0.0397	0.7502	0.0529192	1.92731
ENSSSCG00000012753	ENSMUSG00000005864	0.0236	0.8015	0.0294448	0.64885
ENSSSCG00000012758	ENSMUSG00000031349	0.0655	0.8014	0.081732	0.6925
ENSSSCG00000012770	ENSMUSG00000049489	0.056	0.792	0.0707071	0.7252
ENSSSCG00000012773	ENSMUSG00000002012	0.0209	0.7159	0.029194	0.65335
ENSSSCG00000012784	ENSMUSG00000002014	0.0246	0.6603	0.0372558	0.62625
ENSSSCG00000012791	ENSMUSG00000031388	0.0202	0.8142	0.0248096	0.79745
ENSSSCG00000012795	ENSMUSG00000031392	0.1369	0.898	0.15245	0.69275
ENSSSCG00000012827	ENSMUSG00000043715	0.106	1.4689	0.0721628	0.756
ENSSSCG00000012835	ENSMUSG00000048191	0.1864	1.686	0.110558	0.36955
ENSSSCG00000012840	ENSMUSG00000025510	0.06	1.5148	0.0396092	0.7101
ENSSSCG00000012852	ENSMUSG00000025497	0.3829	1.3216	0.289725	0.7868
ENSSSCG00000012974	ENSMUSG00000056201	0.13	116.082	0.00111989	0.6282
ENSSSCG00000012999	ENSMUSG00000024942	0.0542	0.9642	0.0562124	0.37665
ENSSSCG00000013007	ENSMUSG00000024792	0.0519	0.6119	0.0848178	0.73985
ENSSSCG00000013013	ENSMUSG00000024944	0.0189	0.5187	0.0364372	0.71105
ENSSSCG00000013050	ENSMUSG00000024969	0.0434	0.4235	0.102479	0.65075
ENSSSCG00000013057	ENSMUSG00000067656	0.4038	0.863	0.467903	0.7036
ENSSSCG00000013057	ENSMUSG00000024757	0.3257	0.7852	0.414799	0.7459
ENSSSCG00000013057	ENSMUSG00000053303	0.4228	0.606	0.69769	0.6372
ENSSSCG00000013057	ENSMUSG00000075044	0.41	0.8221	0.498723	0.69915
ENSSSCG00000013057	ENSMUSG00000063590	0.3865	0.8386	0.460887	0.78815
ENSSSCG00000013057	ENSMUSG00000052562	0.3902	0.8482	0.460033	0.3268
ENSSSCG00000013118	ENSMUSG00000024683	0.0995	0.5885	0.169074	0.6611
ENSSSCG00000013131	ENSMUSG00000067524	0.0675	0.6346	0.106366	0.66545
ENSSSCG00000013139	ENSMUSG00000094133	0.1576	0.8754	0.180032	0.75635
ENSSSCG00000013139	ENSMUSG00000067519	0.1473	0.7936	0.18561	0.31965
ENSSSCG00000013139	ENSMUSG00000095640	0.1502	0.7293	0.205951	0.69965
ENSSSCG00000013139	ENSMUSG00000096436	0.1645	0.7557	0.217679	0.76945
ENSSSCG00000013139	ENSMUSG00000060049	0.1589	0.8271	0.192117	0.69515
ENSSSCG00000013139	ENSMUSG00000067513	0.1783	0.8236	0.216489	0.62235
ENSSSCG00000024585	ENSMUSG00000037737	0.1321	0.5486	0.240795	0.3404
ENSSSCG00000024680	ENSMUSG00000094870	0.0481	0.5675	0.0847577	0.30395
ENSSSCG00000024682	ENSMUSG00000017344	0.1745	0.8318	0.209786	1.90379
ENSSSCG00000024728	ENSMUSG00000046975	0.0821	0.8341	0.0984294	0.557
ENSSSCG00000024813	ENSMUSG00000020700	0.0143	0.4765	0.0300105	0.3626
ENSSSCG00000024821	ENSMUSG00000022548	0.139	0.7226	0.192361	0.35055
ENSSSCG00000024889	ENSMUSG00000041468	0.0299	0.6466	0.0462419	0.32355
ENSSSCG00000024890	ENSMUSG00000050015	0.8103	0.6004	1.3496	0.3445
ENSSSCG00000024908	ENSMUSG00000031517	0.1342	0.9926	0.1352	0.7584
ENSSSCG00000024940	ENSMUSG00000067186	0.1281	0.5308	0.241334	0.36145
ENSSSCG00000024950	ENSMUSG00000055312	0.1663	0.9358	0.177709	0.6804
ENSSSCG00000024975	ENSMUSG00000026398	0.0748	0.9044	0.0827068	0.32845
ENSSSCG00000025005	ENSMUSG00000056124	0.0261	0.5375	0.0485581	0.7714
ENSSSCG00000025026	ENSMUSG00000078355	0.3275	0.9559	0.342609	0.36785
ENSSSCG00000025026	ENSMUSG00000078354	0.3424	0.8235	0.415786	0.6346
ENSSSCG00000025026	ENSMUSG00000101252	0.2983	0.7987	0.373482	0.74475
ENSSSCG00000025026	ENSMUSG00000100713	0.3104	0.7589	0.409013	1.9378
ENSSSCG00000025026	ENSMUSG00000100079	0.3141	0.8334	0.37689	0.7875
ENSSSCG00000025026	ENSMUSG00000096011	0.2998	0.7214	0.415581	0.65975
ENSSSCG00000025026	ENSMUSG00000063376	0.2906	0.8493	0.342164	0.6481
ENSSSCG00000025026	ENSMUSG00000095270	0.3187	0.7681	0.41492	0.69995
ENSSSCG00000025026	ENSMUSG00000096682	0.2978	0.7395	0.402705	0.33185
ENSSSCG00000025026	ENSMUSG00000070904	0.3171	0.8971	0.353472	0.6483
ENSSSCG00000025026	ENSMUSG00000073811	0.3127	0.679	0.46053	1.9359
ENSSSCG00000025026	ENSMUSG00000100549	0.332	0.8249	0.402473	0.74405
ENSSSCG00000025026	ENSMUSG00000095498	0.3071	0.786	0.390712	0.6392
ENSSSCG00000025026	ENSMUSG00000095896	0.325	0.8174	0.397602	0.60925
ENSSSCG00000025044	ENSMUSG00000002608	0.095	1.1003	0.0863401	1.90127
ENSSSCG00000025074	ENSMUSG00000044292	0.1048	0.7903	0.132608	1.90569
ENSSSCG00000025074	ENSMUSG00000060254	0.8141	0.7652	1.0639	0.6088
ENSSSCG00000025074	ENSMUSG00000059473	0.104	0.8217	0.126567	0.0829
ENSSSCG00000025113	ENSMUSG00000024251	0.1637	0.604	0.271026	0.7511
ENSSSCG00000025163	ENSMUSG00000002059	0.087	0.6143	0.141625	0.66115
ENSSSCG00000025209	ENSMUSG00000033632	0.0718	0.3621	0.198288	0.7944
ENSSSCG00000025268	ENSMUSG00000030399	0.0539	1.0334	0.0521579	0.7136
ENSSSCG00000025278	ENSMUSG00000092077	0.1518	0.6897	0.220096	0.7839
ENSSSCG00000025278	ENSMUSG00000049618	0.1408	0.7038	0.200057	0.6676
ENSSSCG00000025278	ENSMUSG00000091531	0.141	0.6257	0.225348	0.6476
ENSSSCG00000025298	ENSMUSG00000020561	0.1406	0.7814	0.179933	0.6485
ENSSSCG00000025371	ENSMUSG00000028886	0.819	0.377	2.17241	0.66675
ENSSSCG00000025466	ENSMUSG00000050640	0.0448	1.275	0.0351373	1.93191
ENSSSCG00000025529	ENSMUSG00000021749	0.1759	0.7656	0.229754	0.67805
ENSSSCG00000025546	ENSMUSG00000038094	0.1424	0.5769	0.246837	0.6668
ENSSSCG00000025595	ENSMUSG00000055720	0.2081	0.7165	0.29044	0.609
ENSSSCG00000025598	ENSMUSG00000034903	0.3974	1.0202	0.389531	0.38875
ENSSSCG00000025610	ENSMUSG00000023353	0.0177	0.7957	0.0222446	0.69715
ENSSSCG00000025621	ENSMUSG00000044365	0.028	0.8171	0.0342675	0.6925
ENSSSCG00000025633	ENSMUSG00000051046	0.1987	0.8007	0.248158	0.6533
ENSSSCG00000025701	ENSMUSG00000032475	0.0104	0.5013	0.0207461	0.70755
ENSSSCG00000025732	ENSMUSG00000073922	0.0929	0.884	0.10509	0.33475
ENSSSCG00000025817	ENSMUSG00000027674	0.032	0.6479	0.0493903	0.3079
ENSSSCG00000025839	ENSMUSG00000036054	0.1622	0.8901	0.182227	0.3501
ENSSSCG00000025879	ENSMUSG00000048385	0.1294	1.1347	0.114039	0.78075
ENSSSCG00000025887	ENSMUSG00000040811	0.0611	0.932	0.0655579	0.6103
ENSSSCG00000025901	ENSMUSG00000054469	0.0678	0.5521	0.122804	0.30105
ENSSSCG00000025925	ENSMUSG00000073998	0.0942	0.9853	0.0956054	0.3991
ENSSSCG00000025925	ENSMUSG00000073997	0.0982	0.9679	0.101457	0.746
ENSSSCG00000025963	ENSMUSG00000042064	0.728	75.6757	0.00962	0.6943
ENSSSCG00000025982	ENSMUSG00000005124	0.248	1.7342	0.143005	0.3556
ENSSSCG00000025985	ENSMUSG00000046650	0.1355	0.6805	0.199118	0.3205
ENSSSCG00000026005	ENSMUSG00000048652	0.021	0.291	0.0721649	0.66
ENSSSCG00000026046	ENSMUSG00000044442	0.8102	0.4625	1.75178	0.6848
ENSSSCG00000026116	ENSMUSG00000014778	0.0855	0.5729	0.149241	0.6544
ENSSSCG00000026135	ENSMUSG00000007603	0.1025	1.4521	0.0705874	0.685
ENSSSCG00000026173	ENSMUSG00000015243	0.0199	0.5476	0.0363404	0.31055
ENSSSCG00000026301	ENSMUSG00000050029	0.0025	0.201	0.0124378	0.7557
ENSSSCG00000026327	ENSMUSG00000027109	0.0093	0.1591	0.0584538	0.0966
ENSSSCG00000026354	ENSMUSG00000039449	0.0018	0.6808	0.00264395	0.6997
ENSSSCG00000026368	ENSMUSG00000032431	0.0436	1.0464	0.0416667	0.30285
ENSSSCG00000026389	ENSMUSG00000090935	0.1872	0.4386	0.426813	0.3378
ENSSSCG00000026443	ENSMUSG00000034902	0.1247	1.4885	0.0837756	0.33795
ENSSSCG00000026448	ENSMUSG00000033530	0.0737	0.6665	0.110578	1.9319
ENSSSCG00000026499	ENSMUSG00000026643	0.0245	0.7755	0.0315925	0.746
ENSSSCG00000026512	ENSMUSG00000030669	0.2955	0.7982	0.370208	0.38185
ENSSSCG00000026516	ENSMUSG00000005958	0.0135	0.7698	0.017537	0.7417
ENSSSCG00000026530	ENSMUSG00000032641	0.0745	0.9744	0.0764573	0.35405
ENSSSCG00000026575	ENSMUSG00000036875	0.0991	1.285	0.0771206	0.6984
ENSSSCG00000026602	ENSMUSG00000043017	0.1237	1.3505	0.0915957	0.7745
ENSSSCG00000026669	ENSMUSG00000057674	0.1603	4.4116	0.036336	0.3771
ENSSSCG00000026669	ENSMUSG00000058725	0.1584	4.8317	0.0327835	0.7866
ENSSSCG00000026669	ENSMUSG00000060756	0.1577	4.4737	0.0352505	0.345
ENSSSCG00000026669	ENSMUSG00000062278	0.1581	4.2756	0.0369773	0.639
ENSSSCG00000026675	ENSMUSG00000076867	0.2905	0.5998	0.484328	0.6434
ENSSSCG00000026681	ENSMUSG00000019820	0.0784	0.9125	0.0859178	0.75205
ENSSSCG00000026695	ENSMUSG00000005824	0.1611	1.4689	0.109674	0.75595
ENSSSCG00000026719	ENSMUSG00000075470	0.0747	0.7866	0.0949657	0.626
ENSSSCG00000026747	ENSMUSG00000021830	0.2681	0.6753	0.397009	0.70775
ENSSSCG00000026752	ENSMUSG00000034165	0.1773	0.8535	0.207733	0.64435
ENSSSCG00000026770	ENSMUSG00000045665	0.0288	0.4482	0.064257	0.6922
ENSSSCG00000026815	ENSMUSG00000023066	0.2727	0.7388	0.369112	0.742
ENSSSCG00000026839	ENSMUSG00000035297	0.1394	0.2222	0.627363	0.65675
ENSSSCG00000026975	ENSMUSG00000006736	0.0766	0.4589	0.166921	0.77715
ENSSSCG00000027008	ENSMUSG00000039196	0.4841	1.9951	0.242644	0.6458
ENSSSCG00000027008	ENSMUSG00000061540	0.5379	1.674	0.321326	0.7767
ENSSSCG00000027008	ENSMUSG00000028359	0.6483	1.713	0.378459	0.745
ENSSSCG00000027016	ENSMUSG00000049643	0.0535	0.562	0.0951957	0.68395
ENSSSCG00000027039	ENSMUSG00000068259	0.1268	0.9312	0.136168	0.69575
ENSSSCG00000027080	ENSMUSG00000030760	0.316	0.9781	0.323075	0.7557
ENSSSCG00000027114	ENSMUSG00000028600	0.0956	1.4815	0.0645292	0.6544
ENSSSCG00000027121	ENSMUSG00000011179	0.0526	0.7595	0.0692561	0.6274
ENSSSCG00000027170	ENSMUSG00000026000	0.0552	0.8	0.069	0.689
ENSSSCG00000027174	ENSMUSG00000071909	0.7663	1.3819	0.554526	0.7869
ENSSSCG00000027180	ENSMUSG00000063764	0.1236	0.5822	0.212298	0.3215
ENSSSCG00000027180	ENSMUSG00000063120	0.1336	0.68	0.196471	0.69945
ENSSSCG00000027331	ENSMUSG00000048126	0.0941	0.9127	0.103101	0.6541
ENSSSCG00000027337	ENSMUSG00000040856	0.0992	0.8618	0.115108	0.60785
ENSSSCG00000027343	ENSMUSG00000018567	0	0	0	0
ENSSSCG00000027381	ENSMUSG00000053460	0.0682	0.5199	0.131179	0.3146
ENSSSCG00000027420	ENSMUSG00000044708	0.006	0.6416	0.00935162	0.7578
ENSSSCG00000027582	ENSMUSG00000028453	0.2055	0.5437	0.377966	0.76895
ENSSSCG00000027588	ENSMUSG00000045202	0.8104	0.972	0.833745	0.79835
ENSSSCG00000027603	ENSMUSG00000042520	0.0031	0.1753	0.017684	0.6456
ENSSSCG00000027621	ENSMUSG00000040280	0.0205	0.7334	0.027952	0.3175
ENSSSCG00000027650	ENSMUSG00000055943	0.0282	0.4461	0.0632145	0.3037
ENSSSCG00000027653	ENSMUSG00000033096	0.0551	0.5459	0.100934	0.68575
ENSSSCG00000027806	ENSMUSG00000027639	0.2282	1.0393	0.219571	0.71775
ENSSSCG00000027807	ENSMUSG00000066640	0.0596	2.2165	0.0268892	0.79825
ENSSSCG00000027809	ENSMUSG00000025857	0.1653	2.5597	0.0645779	0.39285
ENSSSCG00000027830	ENSMUSG00000042379	0.1531	0.6208	0.246617	0.38965
ENSSSCG00000027849	ENSMUSG00000062585	0.8148	0.7618	1.06957	0.63385
ENSSSCG00000027921	ENSMUSG00000062638	0.3462	0.8582	0.403402	0.6332
ENSSSCG00000027981	ENSMUSG00000085584	0.2423	0.5512	0.439586	0.65125
ENSSSCG00000027989	ENSMUSG00000046826	0.361	1.4505	0.24888	0.6269
ENSSSCG00000027996	ENSMUSG00000022485	0	0	0	0
ENSSSCG00000028054	ENSMUSG00000046541	0.0813	0.8326	0.0976459	0.66755
ENSSSCG00000028063	ENSMUSG00000030852	0.3426	0.6161	0.556079	0.747
ENSSSCG00000028166	ENSMUSG00000032921	0.5901	1.0031	0.588276	0.388
ENSSSCG00000028173	ENSMUSG00000058063	0.4031	1.0522	0.383102	0.68425
ENSSSCG00000028182	ENSMUSG00000020015	0.0154	0.5241	0.0293837	0.69585
ENSSSCG00000028203	ENSMUSG00000033688	0.1764	0.6289	0.28049	0.35965
ENSSSCG00000028294	ENSMUSG00000021499	0.3134	2.2553	0.138962	0.74385
ENSSSCG00000028299	ENSMUSG00000036138	0.1032	0.657	0.157078	0.66865
ENSSSCG00000028299	ENSMUSG00000010651	0.095	0.6011	0.158044	0.78905
ENSSSCG00000028382	ENSMUSG00000102428	0.1081	0.7814	0.138341	0.7607
ENSSSCG00000028404	ENSMUSG00000094133	0.1711	0.8521	0.200798	0.75765
ENSSSCG00000028404	ENSMUSG00000067519	0.1667	0.8975	0.185738	0.3018
ENSSSCG00000028404	ENSMUSG00000095640	0.1715	0.7273	0.235804	0.3568
ENSSSCG00000028404	ENSMUSG00000096436	0.1646	0.8324	0.197741	0.60545
ENSSSCG00000028404	ENSMUSG00000060049	0.1763	0.7908	0.222939	0.64585
ENSSSCG00000028404	ENSMUSG00000067513	0.1815	0.8651	0.209802	0.7636
ENSSSCG00000028422	ENSMUSG00000079478	0.0798	0.5769	0.138326	0.74795
ENSSSCG00000028427	ENSMUSG00000040770	0.1677	0.9438	0.177686	0.79485
ENSSSCG00000028484	ENSMUSG00000022512	0.0295	0.4088	0.0721624	1.92542
ENSSSCG00000028493	ENSMUSG00000026965	0.0584	1.1387	0.0512866	0.371
ENSSSCG00000028513	ENSMUSG00000066735	0.0141	0.2071	0.0680831	0.69925
ENSSSCG00000028527	ENSMUSG00000033955	0.2346	0.7858	0.298549	1.90325
ENSSSCG00000028544	ENSMUSG00000094520	0.0888	1.0309	0.0861383	0.7916
ENSSSCG00000028544	ENSMUSG00000094063	0.0943	1.1053	0.0853162	0.6451
ENSSSCG00000028596	ENSMUSG00000094080	0.2791	1.0063	0.277353	0.74265
ENSSSCG00000028596	ENSMUSG00000060205	0.251	0.7911	0.31728	0.6556
ENSSSCG00000028596	ENSMUSG00000048101	0.2103	0.7846	0.268035	0.3416
ENSSSCG00000028596	ENSMUSG00000046493	0.1921	0.9157	0.209785	0.624
ENSSSCG00000028596	ENSMUSG00000063216	0.2419	0.7839	0.308585	0.78445
ENSSSCG00000028596	ENSMUSG00000062873	0.2688	0.9597	0.280088	0.78805
ENSSSCG00000028596	ENSMUSG00000094673	0.2685	0.9589	0.280008	0.30625
ENSSSCG00000028596	ENSMUSG00000042774	0.2104	1.1133	0.188988	0.7858
ENSSSCG00000028648	ENSMUSG00000045341	0.1335	1.216	0.109786	0.6506
ENSSSCG00000028681	ENSMUSG00000028639	0.1797	0.4816	0.373131	0.3631
ENSSSCG00000028686	ENSMUSG00000031767	0.2567	0.8494	0.302213	0.62005
ENSSSCG00000028762	ENSMUSG00000048832	0.1008	0.8596	0.117264	0.68475
ENSSSCG00000028834	ENSMUSG00000073922	0.0911	0.8851	0.102926	0.36535
ENSSSCG00000028865	ENSMUSG00000061104	0.0055	0.6545	0.00840336	0.7915
ENSSSCG00000028865	ENSMUSG00000021963	0.0055	0.6545	0.00840336	0.63275
ENSSSCG00000028895	ENSMUSG00000025145	0.4434	2.8519	0.155475	0.6325
ENSSSCG00000028998	ENSMUSG00000066107	0.1975	1.9296	0.102353	0.61445
ENSSSCG00000028998	ENSMUSG00000027968	0.1646	1.5198	0.108304	0.69285
ENSSSCG00000029032	ENSMUSG00000090816	2.1794	37.7013	0.057807	0.60955
ENSSSCG00000029032	ENSMUSG00000109516	9.1103	30.0846	0.302823	0.3261
ENSSSCG00000029032	ENSMUSG00000101436	3.6845	2.3206	1.58774	0.6329
ENSSSCG00000029032	ENSMUSG00000096283	3.6845	2.3206	1.58774	0.3438
ENSSSCG00000029032	ENSMUSG00000044624	1.7933	57.5108	0.031182	0.78435
ENSSSCG00000029032	ENSMUSG00000109396	3.8488	3.9869	0.965362	0.7363
ENSSSCG00000029032	ENSMUSG00000073458	6.4486	1.896	3.40116	0.3978
ENSSSCG00000029032	ENSMUSG00000073457	4.5645	1.0205	4.47281	0.78575
ENSSSCG00000029032	ENSMUSG00000079005	2.0309	52.3338	0.0388067	0.6457
ENSSSCG00000029032	ENSMUSG00000075598	8.1518	2.0975	3.88644	0.78425
ENSSSCG00000029032	ENSMUSG00000090308	2.358	25.2491	0.0933895	0.3549
ENSSSCG00000029032	ENSMUSG00000079006	2.0309	52.3338	0.0388067	0.75135
ENSSSCG00000029032	ENSMUSG00000044145	2.078	1.8788	1.10603	0.7922
ENSSSCG00000029032	ENSMUSG00000095976	15.9966	18.2959	0.874327	0.66
ENSSSCG00000029032	ENSMUSG00000067941	2.9259	63.831	0.0458382	0.30035
ENSSSCG00000029032	ENSMUSG00000075599	7.3443	2.0109	3.65225	0.723
ENSSSCG00000029032	ENSMUSG00000061525	1.9973	52.8611	0.0377839	0.6602
ENSSSCG00000029032	ENSMUSG00000091550	4.5902	2.1377	2.14726	0.6069
ENSSSCG00000029032	ENSMUSG00000079156	7.3443	2.0109	3.65225	0.60575
ENSSSCG00000029032	ENSMUSG00000095363	3.6845	2.3206	1.58774	0.71
ENSSSCG00000029032	ENSMUSG00000109060	3.8488	3.9869	0.965362	0.64605
ENSSSCG00000029032	ENSMUSG00000101361	7.3748	39.6175	0.18615	0.7805
ENSSSCG00000029032	ENSMUSG00000095190	3.6845	2.3206	1.58774	0.64985
ENSSSCG00000029032	ENSMUSG00000109166	8.3095	32.2527	0.257637	0.7458
ENSSSCG00000029032	ENSMUSG00000094682	3.6845	2.3206	1.58774	0.7295
ENSSSCG00000029032	ENSMUSG00000095683	18.7075	11.1653	1.6755	0.7561
ENSSSCG00000029049	ENSMUSG00000040389	0.0401	0.7212	0.0556018	0.7157
ENSSSCG00000029071	ENSMUSG00000048299	0.1351	0.8577	0.157514	0.6656
ENSSSCG00000029082	ENSMUSG00000029004	0.0581	0.4436	0.130974	0.65185
ENSSSCG00000029106	ENSMUSG00000037075	0.0314	0.3304	0.0950363	0.61135
ENSSSCG00000029122	ENSMUSG00000005410	0.0525	2.4334	0.0215748	0.6345
ENSSSCG00000029163	ENSMUSG00000030268	0.87	1.2519	0.694944	0.62285
ENSSSCG00000029234	ENSMUSG00000043456	0.0686	0.9583	0.0715851	0.62295
ENSSSCG00000029252	ENSMUSG00000022523	0.0724	0.3836	0.188738	0.3843
ENSSSCG00000029275	ENSMUSG00000029167	0.0488	0.2945	0.165705	0.7471
ENSSSCG00000029309	ENSMUSG00000022792	0.0796	0.5681	0.140116	0.7454
ENSSSCG00000029361	ENSMUSG00000096516	0.1267	0.8666	0.146204	0.3098
ENSSSCG00000029361	ENSMUSG00000094822	0.1244	0.929	0.133907	0.3943
ENSSSCG00000029392	ENSMUSG00000053414	0.0325	0.8944	0.0363372	0.785
ENSSSCG00000029397	ENSMUSG00000016541	0.1651	0.9347	0.176634	0.3708
ENSSSCG00000029440	ENSMUSG00000043241	0.0652	0.9015	0.0723239	0.62495
ENSSSCG00000029465	ENSMUSG00000040040	0.1083	0.895	0.121006	0.78815
ENSSSCG00000029496	ENSMUSG00000040407	0.1296	0.7922	0.163595	0.37755
ENSSSCG00000029511	ENSMUSG00000042345	0.1001	1.2547	0.07978	1.93109
ENSSSCG00000029556	ENSMUSG00000014426	0.0281	1.2479	0.0225178	0.3149
ENSSSCG00000029569	ENSMUSG00000044542	0.1772	0.6999	0.253179	0.3939
ENSSSCG00000029608	ENSMUSG00000027706	0.0314	0.2691	0.116685	0.75625
ENSSSCG00000029744	ENSMUSG00000029055	0.8142	1.0401	0.782809	0.6215
ENSSSCG00000029770	ENSMUSG00000055401	0.2303	2.0949	0.109934	0.3268
ENSSSCG00000029788	ENSMUSG00000032044	0.1706	0.6921	0.246496	0.72035
ENSSSCG00000029796	ENSMUSG00000055675	0.0992	1.2078	0.0821328	0.7257
ENSSSCG00000029810	ENSMUSG00000014550	0.1051	0.5937	0.177025	0.3391
ENSSSCG00000029821	ENSMUSG00000049583	0.017	0.7146	0.0237895	0.6936
ENSSSCG00000029827	ENSMUSG00000066383	0.3577	1.4367	0.248973	0.3704
ENSSSCG00000029830	ENSMUSG00000003970	0	0	0	0
ENSSSCG00000029885	ENSMUSG00000032293	0.0323	0.3415	0.0945827	0.7912
ENSSSCG00000029916	ENSMUSG00000037946	0.2036	1.0497	0.19396	0.62905
ENSSSCG00000029931	ENSMUSG00000047022	0.7451	1.0892	0.68408	0.75745
ENSSSCG00000029946	ENSMUSG00000067528	0.1084	0.6579	0.164767	0.3278
ENSSSCG00000029946	ENSMUSG00000044994	0.0835	0.7448	0.112111	0.63065
ENSSSCG00000029946	ENSMUSG00000067526	0.0867	0.5968	0.145275	0.3302
ENSSSCG00000029976	ENSMUSG00000030982	0.165	1.676	0.0984487	0.3512
ENSSSCG00000029987	ENSMUSG00000110970	0.0521	0.8082	0.0644642	0.66855
ENSSSCG00000030023	ENSMUSG00000091230	0.1777	5.2924	0.0335764	1.93197
ENSSSCG00000030023	ENSMUSG00000058773	0.0613	3.7877	0.016184	0.686
ENSSSCG00000030026	ENSMUSG00000043531	0	1.1716	0	0.6431
ENSSSCG00000030117	ENSMUSG00000042349	0.2782	0.7946	0.350113	0.74455
ENSSSCG00000030158	ENSMUSG00000044025	0.0765	0.6457	0.118476	0.6954
ENSSSCG00000030198	ENSMUSG00000090486	0.6919	63.3559	0.0109208	0.62845
ENSSSCG00000030229	ENSMUSG00000042210	0.1083	0.6407	0.169034	0.6013
ENSSSCG00000030262	ENSMUSG00000061666	0.0493	0.5711	0.0863246	0.6264
ENSSSCG00000030346	ENSMUSG00000031105	0.0485	0.5529	0.0877193	0.6438
ENSSSCG00000030347	ENSMUSG00000059623	0.1632	0.7391	0.220809	0.6586
ENSSSCG00000030347	ENSMUSG00000044454	0.1901	0.9105	0.208786	0.3865
ENSSSCG00000030347	ENSMUSG00000051118	0.224	0.8963	0.249916	0.78675
ENSSSCG00000030357	ENSMUSG00000018554	0.0152	0.3593	0.0423045	0.682
ENSSSCG00000030451	ENSMUSG00000033728	0.0302	1.6088	0.0187718	0.34845
ENSSSCG00000030461	ENSMUSG00000031936	0.0626	0.5789	0.108136	0.66435
ENSSSCG00000030463	ENSMUSG00000035765	0.8107	0.6323	1.28214	0.72075
ENSSSCG00000030660	ENSMUSG00000050890	0.0014	0.3569	0.00392267	0.3365
ENSSSCG00000030781	ENSMUSG00000072553	0.1053	1.3361	0.0788115	0.7308
ENSSSCG00000030827	ENSMUSG00000054252	0.1239	1.3773	0.0899586	1.96486
ENSSSCG00000030845	ENSMUSG00000054932	0.2473	0.8238	0.300194	0.3127
ENSSSCG00000030857	ENSMUSG00000035545	0.0389	0.9057	0.0429502	0.73915
ENSSSCG00000030908	ENSMUSG00000036013	0.708	1.0024	0.706305	0.6221
ENSSSCG00000030920	ENSMUSG00000024327	0.0735	0.5138	0.143052	0.39525
ENSSSCG00000030970	ENSMUSG00000031231	0.1356	0.1953	0.694316	0.3604
ENSSSCG00000031019	ENSMUSG00000031278	0.0463	0.5971	0.0775415	0.668
ENSSSCG00000013174	ENSMUSG00000034101	0.0137	0.4688	0.0292235	0.6308
ENSSSCG00000013174	ENSMUSG00000101645	0.0137	0.4688	0.0292235	0.61715
ENSSSCG00000013237	ENSMUSG00000002111	0.0548	0.8776	0.062443	0.6065
ENSSSCG00000013242	ENSMUSG00000002103	0.0557	0.4151	0.134185	0.35845
ENSSSCG00000013287	ENSMUSG00000032864	0.0614	0.5317	0.115479	0.6369
ENSSSCG00000013297	ENSMUSG00000005087	0.2335	0.5879	0.397176	0.74495
ENSSSCG00000013327	ENSMUSG00000016386	0.0015	0.1999	0.00750375	0.66255
ENSSSCG00000013351	ENSMUSG00000052512	0.0169	0.6522	0.0259123	0.6079
ENSSSCG00000013572	ENSMUSG00000004565	0.0298	0.8547	0.034866	0.65995
ENSSSCG00000013578	ENSMUSG00000074491	0.2665	1.1353	0.23474	0.78045
ENSSSCG00000013612	ENSMUSG00000001348	0.8105	0.9208	0.880213	1.99754
ENSSSCG00000013639	ENSMUSG00000057193	0.0629	1.0375	0.0606265	0.7974
ENSSSCG00000013655	ENSMUSG00000037405	0.4085	1.7692	0.230895	0.3988
ENSSSCG00000013696	ENSMUSG00000066897	0.2652	0.7393	0.358718	7.7989
ENSSSCG00000013696	ENSMUSG00000050803	0.2519	0.7706	0.326888	0.7811
ENSSSCG00000013696	ENSMUSG00000044106	0.2454	0.7257	0.338156	0.65155
ENSSSCG00000013696	ENSMUSG00000058491	0.8733	0.7398	1.18045	0.714
ENSSSCG00000013696	ENSMUSG00000049028	0.194	0.6548	0.296274	0.7722
ENSSSCG00000013766	ENSMUSG00000005465	0.8702	0.8602	1.01163	0.66205
ENSSSCG00000013775	ENSMUSG00000002885	0.8792	1.0108	0.869806	0.64435
ENSSSCG00000013813	ENSMUSG00000094080	0.2941	1.0572	0.278188	0.74265
ENSSSCG00000013813	ENSMUSG00000060205	0.2066	0.7096	0.29115	0.74895
ENSSSCG00000013813	ENSMUSG00000048101	0.2001	0.7089	0.282268	1.90842
ENSSSCG00000013813	ENSMUSG00000046493	0.2013	0.8588	0.234397	0.74025
ENSSSCG00000013813	ENSMUSG00000063216	0.213	0.6994	0.304547	0.62015
ENSSSCG00000013813	ENSMUSG00000062873	0.8778	1.06	0.828113	0.6095
ENSSSCG00000013813	ENSMUSG00000094673	0.8724	1.0169	0.857901	0.67055
ENSSSCG00000013813	ENSMUSG00000042774	0.2264	0.9274	0.244123	0.7856
ENSSSCG00000013829	ENSMUSG00000032714	0.0727	0.724	0.100414	0.78145
ENSSSCG00000013836	ENSMUSG00000024050	0.088	0.6136	0.143416	0.68115
ENSSSCG00000013841	ENSMUSG00000094891	0.0738	0.6967	0.105928	0.72595
ENSSSCG00000013841	ENSMUSG00000093884	0.0704	0.7368	0.0955483	0.6592
ENSSSCG00000013841	ENSMUSG00000096169	0.0824	0.8092	0.101829	0.62105
ENSSSCG00000013842	ENSMUSG00000073424	0.1358	0.7241	0.187543	0.72405
ENSSSCG00000013842	ENSMUSG00000003484	0.1573	0.8767	0.179423	0.3078
ENSSSCG00000013842	ENSMUSG00000090700	0.1404	0.818	0.171638	0.69835
ENSSSCG00000013842	ENSMUSG00000024292	0.1306	0.7085	0.184333	0.65885
ENSSSCG00000013853	ENSMUSG00000062007	0.4076	1.5637	0.260664	0.626
ENSSSCG00000013888	ENSMUSG00000031805	0.0867	1.2578	0.0689299	0.6598
ENSSSCG00000013978	ENSMUSG00000049755	0.1724	1.4937	0.115418	0.74905
ENSSSCG00000014010	ENSMUSG00000020366	0.0206	0.5273	0.0390669	0.33355
ENSSSCG00000014028	ENSMUSG00000020385	0.0149	0.4534	0.0328628	0.71525
ENSSSCG00000014047	ENSMUSG00000005320	0.051	0.6392	0.0797872	0.7899
ENSSSCG00000014048	ENSMUSG00000025877	0.1044	0.6547	0.159462	0.3535
ENSSSCG00000014070	ENSMUSG00000021661	0.0197	0.5235	0.0376313	0.6038
ENSSSCG00000014131	ENSMUSG00000003992	0.0299	0.301	0.0993355	0.72855
ENSSSCG00000014143	ENSMUSG00000065947	0.2321	10.4822	0.0221423	0.73835
ENSSSCG00000014177	ENSMUSG00000023852	0.0256	0.7727	0.0331306	0.64625
ENSSSCG00000014184	ENSMUSG00000026335	0.0543	0.483	0.112422	0.38375
ENSSSCG00000014223	ENSMUSG00000042705	0.0653	0.7187	0.0908585	0.3921
ENSSSCG00000014232	ENSMUSG00000024529	0.0709	0.7454	0.0951167	0.3738
ENSSSCG00000014320	ENSMUSG00000056222	0.0078	0.8117	0.00960946	0.6812
ENSSSCG00000014351	ENSMUSG00000073599	0.4326	0.9156	0.472477	0.6447
ENSSSCG00000014414	ENSMUSG00000024491	0.0177	0.4056	0.0436391	0.78715
ENSSSCG00000014416	ENSMUSG00000024498	0.0324	0.4908	0.0660147	0.36175
ENSSSCG00000014421	ENSMUSG00000071858	0.3516	0.9623	0.365375	0.35425
ENSSSCG00000014424	ENSMUSG00000055095	0.0853	1.3095	0.0651394	0.74505
ENSSSCG00000014427	ENSMUSG00000042211	0.0517	0.7803	0.0662566	0.63385
ENSSSCG00000014460	ENSMUSG00000075145	0.1053	0.6725	0.15658	1.99461
ENSSSCG00000014538	ENSMUSG00000020346	0.0508	0.7127	0.0712782	1.93177
ENSSSCG00000014564	ENSMUSG00000025491	0.8736	1.0992	0.79476	0.3746
ENSSSCG00000014564	ENSMUSG00000060591	0.4114	78.4131	0.00524657	0.6058
ENSSSCG00000014564	ENSMUSG00000065968	0.4465	61.1871	0.00729729	8.5763
ENSSSCG00000014564	ENSMUSG00000059108	0.3893	3.1671	0.12292	0.6869
ENSSSCG00000014564	ENSMUSG00000110104	0.4815	82.5504	0.0058328	0.61525
ENSSSCG00000014564	ENSMUSG00000025492	0.3716	8.0153	0.0463613	0.3975
ENSSSCG00000014608	ENSMUSG00000036647	0.0847	0.6152	0.137679	0.35675
ENSSSCG00000014614	ENSMUSG00000109354	0.1314	0.9434	0.139283	0.7492
ENSSSCG00000014614	ENSMUSG00000036744	0.1323	1.0739	0.123196	0.78635
ENSSSCG00000014618	ENSMUSG00000078606	0.2215	0.7137	0.310354	1.90704
ENSSSCG00000014618	ENSMUSG00000045868	0.2212	0.7136	0.309978	0.66995
ENSSSCG00000014632	ENSMUSG00000044465	0.0921	0.6673	0.138019	0.3807
ENSSSCG00000014643	ENSMUSG00000096029	0.0712	1.1913	0.0597666	0.65205
ENSSSCG00000014643	ENSMUSG00000095248	0.0745	1.1803	0.0631195	0.68845
ENSSSCG00000014648	ENSMUSG00000047794	0.0832	0.6015	0.138321	1.90117
ENSSSCG00000014672	ENSMUSG00000056144	0.3034	0.8952	0.338919	0.7816
ENSSSCG00000014672	ENSMUSG00000090215	0.3055	0.9096	0.335862	0.38235
ENSSSCG00000014681	ENSMUSG00000073932	0.0756	0.6725	0.112416	0.76815
ENSSSCG00000014708	ENSMUSG00000073946	0.1029	0.7838	0.131283	0.65355
ENSSSCG00000014708	ENSMUSG00000073945	0.1428	1.0043	0.142189	0.7473
ENSSSCG00000014708	ENSMUSG00000073944	0.1329	1.0055	0.132173	0.68115
ENSSSCG00000014708	ENSMUSG00000073943	0.1095	0.8666	0.126356	0.7331
ENSSSCG00000014725	ENSMUSG00000052305	0.133	0.7665	0.173516	0.67325
ENSSSCG00000014725	ENSMUSG00000078621	0.3442	0.958	0.35929	0.79945
ENSSSCG00000014725	ENSMUSG00000073940	0.1334	0.7906	0.168733	0.74645
ENSSSCG00000014726	ENSMUSG00000052187	0.104	1.1411	0.0911401	0.6879
ENSSSCG00000014764	ENSMUSG00000043366	0.0479	0.74	0.0647297	0.69605
ENSSSCG00000014875	ENSMUSG00000035547	0.0379	1.2816	0.0295724	0.32625
ENSSSCG00000014927	ENSMUSG00000030562	0.0545	0.5397	0.100982	0.75695
ENSSSCG00000014933	ENSMUSG00000043943	0.1002	0.6791	0.147548	0.08865
ENSSSCG00000014955	ENSMUSG00000031928	0.0851	0.8363	0.101758	1.93151
ENSSSCG00000014984	ENSMUSG00000070323	0.1539	0.6543	0.235213	0.74715
ENSSSCG00000014996	ENSMUSG00000025887	0.2491	0.6772	0.367838	0.74465
ENSSSCG00000015037	ENSMUSG00000039217	0.2744	0.6628	0.414001	0.74565
ENSSSCG00000015063	ENSMUSG00000032076	0.0119	0.2037	0.0584192	0.745
ENSSSCG00000015085	ENSMUSG00000032089	0.3663	0.7846	0.466862	0.6204
ENSSSCG00000015150	ENSMUSG00000049073	0.0919	0.6507	0.141233	0.68255
ENSSSCG00000015173	ENSMUSG00000064110	0.131	0.8107	0.161589	0.62865
ENSSSCG00000015173	ENSMUSG00000059106	0.1508	0.9138	0.165025	0.7874
ENSSSCG00000015173	ENSMUSG00000059867	0.1643	0.9216	0.178277	0.65615
ENSSSCG00000015195	ENSMUSG00000011114	0.1042	0.3625	0.287448	0.633
ENSSSCG00000015227	ENSMUSG00000032042	0.0185	0.3974	0.0465526	0.36605
ENSSSCG00000015279	ENSMUSG00000103421	0.1707	0.771	0.221401	0.3326
ENSSSCG00000015281	ENSMUSG00000041757	0.0537	0.6119	0.0877594	0.6252
ENSSSCG00000015362	ENSMUSG00000020577	0.3212	1.3835	0.232165	0.78925
ENSSSCG00000015364	ENSMUSG00000019256	0.0951	0.808	0.117698	0.6043
ENSSSCG00000015368	ENSMUSG00000004698	0.0403	0.3605	0.111789	0.3095
ENSSSCG00000015378	ENSMUSG00000025323	0.0181	0.2159	0.0838351	0.6486
ENSSSCG00000015405	ENSMUSG00000002944	0.0946	0.6244	0.151505	0.6442
ENSSSCG00000015430	ENSMUSG00000028999	0.0755	0.6064	0.124505	0.72165
ENSSSCG00000015537	ENSMUSG00000026469	0.0267	0.32	0.0834375	0.3526
ENSSSCG00000015563	ENSMUSG00000026482	0.0284	0.6641	0.0427646	0.6968
ENSSSCG00000015592	ENSMUSG00000026632	0.0894	0.4842	0.184634	0.6691
ENSSSCG00000015595	ENSMUSG00000026628	0.0181	0.5135	0.0352483	0.3069
ENSSSCG00000015597	ENSMUSG00000037499	0.2061	1.0191	0.202237	0.6278
ENSSSCG00000015629	ENSMUSG00000018654	0.074	2.077	0.0356283	0.6171
ENSSSCG00000015644	ENSMUSG00000042349	0.0766	0.9939	0.0770701	0.37045
ENSSSCG00000015688	ENSMUSG00000045382	0.0511	0.8945	0.0571269	1.92548
ENSSSCG00000015732	ENSMUSG00000026380	0.0343	0.8135	0.0421635	0.6045
ENSSSCG00000015775	ENSMUSG00000031562	0.0533	0.7279	0.0732243	0.62525
ENSSSCG00000015782	ENSMUSG00000031627	0.0278	0.4101	0.0677883	0.38965
ENSSSCG00000015807	ENSMUSG00000037437	0.3082	1.0226	0.301389	1.90353
ENSSSCG00000015808	ENSMUSG00000031555	0.089	0.7527	0.118241	0.7423
ENSSSCG00000015815	ENSMUSG00000031565	0.0307	0.8409	0.0365085	0.74985
ENSSSCG00000015926	ENSMUSG00000027048	0.1391	0.6383	0.217923	0.6199
ENSSSCG00000015951	ENSMUSG00000041921	0.1074	0.4686	0.229193	0.6533
ENSSSCG00000015979	ENSMUSG00000001819	0.0231	0.6049	0.0381881	0.7863
ENSSSCG00000015980	ENSMUSG00000001823	0.0877	0.7303	0.120088	0.64775
ENSSSCG00000015996	ENSMUSG00000042369	0.0557	0.6132	0.090835	0.70705
ENSSSCG00000016067	ENSMUSG00000026094	0.0396	0.6388	0.0619912	0.65595
ENSSSCG00000016122	ENSMUSG00000026011	0.1564	0.4663	0.335406	0.36485
ENSSSCG00000016138	ENSMUSG00000025958	0	0	0	0
ENSSSCG00000016153	ENSMUSG00000055567	0.0179	0.5039	0.0355229	0.7752
ENSSSCG00000016164	ENSMUSG00000025997	0.008	0.2141	0.0373657	34.5438
ENSSSCG00000016173	ENSMUSG00000026192	0.0505	0.6297	0.0801969	0.3444
ENSSSCG00000016230	ENSMUSG00000026235	0.0061	0.623	0.00979133	0.62305
ENSSSCG00000016233	ENSMUSG00000026249	0.0712	0.684	0.104094	0.69855
ENSSSCG00000016254	ENSMUSG00000026166	0.2746	0.4771	0.575561	0.64425
ENSSSCG00000016255	ENSMUSG00000053161	0.0771	0.8523	0.0904611	0.73195
ENSSSCG00000016270	ENSMUSG00000026227	0.22	0.6097	0.360833	0.661
ENSSSCG00000016284	ENSMUSG00000036500	0.1735	1.1648	0.148953	0.6991
ENSSSCG00000016284	ENSMUSG00000026246	0.2005	1.1886	0.168686	0.66625
ENSSSCG00000016284	ENSMUSG00000079440	0.1713	1.0899	0.15717	0.7857
ENSSSCG00000016288	ENSMUSG00000026253	0.0501	0.9099	0.055061	0.34145
ENSSSCG00000016289	ENSMUSG00000026254	0.0055	0.4418	0.0124491	0.65035
ENSSSCG00000016345	ENSMUSG00000067150	0.1282	0.5802	0.220958	0.30865
ENSSSCG00000016391	ENSMUSG00000045174	0.2625	0.9011	0.291311	0.7013
ENSSSCG00000016458	ENSMUSG00000056203	0.341	0.8321	0.409807	0.7769
ENSSSCG00000016459	ENSMUSG00000029859	0.0759	0.7305	0.103901	1.9223
ENSSSCG00000016472	ENSMUSG00000029866	0.1863	0.6503	0.286483	0.7152
ENSSSCG00000016504	ENSMUSG00000029925	0.1373	0.6516	0.210712	0.35965
ENSSSCG00000016561	ENSMUSG00000029775	0.0074	0.4009	0.0184585	0.66085
ENSSSCG00000016581	ENSMUSG00000029767	0.0086	0.3783	0.0227333	0.546
ENSSSCG00000016589	ENSMUSG00000049939	0.0146	0.4085	0.0357405	0.6465
ENSSSCG00000016613	ENSMUSG00000029695	0.0661	0.6831	0.0967647	0.71635
ENSSSCG00000016732	ENSMUSG00000000384	0.1521	1.0456	0.145467	0.60735
ENSSSCG00000016850	ENSMUSG00000054263	0.1598	0.8081	0.197748	1.9379
ENSSSCG00000016885	ENSMUSG00000042284	0.1385	0.8645	0.160208	0.78265
ENSSSCG00000016907	ENSMUSG00000042426	0.0609	0.7128	0.0854377	0.72685
ENSSSCG00000016979	ENSMUSG00000020297	0.0347	0.4231	0.0820137	0.357
ENSSSCG00000016996	ENSMUSG00000020272	0.1332	0.7545	0.176541	0.6902
ENSSSCG00000017008	ENSMUSG00000020143	0.0302	0.608	0.0496711	1.93162
ENSSSCG00000017022	ENSMUSG00000020330	0.1541	0.7218	0.213494	0.66085
ENSSSCG00000017167	ENSMUSG00000017132	0.0236	1.0018	0.0235576	0.6974
ENSSSCG00000017186	ENSMUSG00000052949	0.0432	0.8206	0.0526444	0.697
ENSSSCG00000017204	ENSMUSG00000020758	0.0613	0.9844	0.0622714	0.74095
ENSSSCG00000017236	ENSMUSG00000058728	0.5374	1.0273	0.523119	0.7642
ENSSSCG00000017236	ENSMUSG00000034652	0.7479	1.251	0.597842	0.69365
ENSSSCG00000017236	ENSMUSG00000044811	0.5828	0.9229	0.631488	0.6823
ENSSSCG00000017277	ENSMUSG00000020717	0.2475	0.8146	0.30383	0.748
ENSSSCG00000017414	ENSMUSG00000020918	0.0083	0.6831	0.0121505	0.35285
ENSSSCG00000017437	ENSMUSG00000020916	0.0612	0.76	0.0805263	0.72885
ENSSSCG00000017455	ENSMUSG00000057674	0.1467	4.9415	0.0296873	0.77065
ENSSSCG00000017455	ENSMUSG00000058725	0.1449	5.4538	0.0265686	0.6885
ENSSSCG00000017455	ENSMUSG00000060756	0.1442	5.051	0.0285488	0.31365
ENSSSCG00000017455	ENSMUSG00000062278	0.1446	4.8213	0.0299919	0.6659
ENSSSCG00000017461	ENSMUSG00000055937	0.1039	0.8753	0.118702	0.3709
ENSSSCG00000017475	ENSMUSG00000037992	0.0081	0.6195	0.0130751	0.64185
ENSSSCG00000017496	ENSMUSG00000002580	0.0496	0.4964	0.0999194	0.62075
ENSSSCG00000017498	ENSMUSG00000061718	0.0792	0.8105	0.0977175	0.6685
ENSSSCG00000017543	ENSMUSG00000006056	0.6878	1.9749	0.348271	0.7989
ENSSSCG00000017555	ENSMUSG00000020863	0.0151	0.4546	0.033216	0.32105
ENSSSCG00000017578	ENSMUSG00000001507	0.8148	0.7085	1.15004	0.6381
ENSSSCG00000017636	ENSMUSG00000009356	0.2039	0.9857	0.206858	0.64575
ENSSSCG00000017637	ENSMUSG00000009350	0.0876	0.8398	0.104311	0.379
ENSSSCG00000017645	ENSMUSG00000010342	0.2316	0.5088	0.455189	0.7085
ENSSSCG00000017702	ENSMUSG00000018927	0.6202	1.1904	0.521001	0.69765
ENSSSCG00000017702	ENSMUSG00000019122	0.6916	1.0911	0.633856	0.7212
ENSSSCG00000017705	ENSMUSG00000035042	0.1261	0.7891	0.159802	0.37875
ENSSSCG00000017775	ENSMUSG00000017386	0.0134	0.6507	0.0205932	0.33725
ENSSSCG00000017884	ENSMUSG00000020799	0.1321	1.3296	0.0993532	0.66315
ENSSSCG00000017983	ENSMUSG00000020893	0.0556	0.6236	0.0891597	0.771
ENSSSCG00000020688	ENSMUSG00000020069	0.0108	0.1759	0.0613985	0.6924
ENSSSCG00000020702	ENSMUSG00000034252	0.1083	0.5777	0.187468	0.6273
ENSSSCG00000020756	ENSMUSG00000037962	0.1596	0.875	0.1824	0.7959
ENSSSCG00000020828	ENSMUSG00000001942	0.87	0.6638	1.31064	0.77565
ENSSSCG00000020903	ENSMUSG00000020029	0.0257	0.4663	0.0551147	0.7108
ENSSSCG00000020961	ENSMUSG00000041147	0.2485	0.7935	0.31317	0.3275
ENSSSCG00000020985	ENSMUSG00000050526	0.3761	1.1274	0.333599	0.7192
ENSSSCG00000021000	ENSMUSG00000020544	0.0923	0.5145	0.179397	0.6814
ENSSSCG00000021127	ENSMUSG00000050742	0.1652	0.8047	0.205294	0.6921
ENSSSCG00000021127	ENSMUSG00000050158	0.1869	0.8611	0.217048	0.7075
ENSSSCG00000021130	ENSMUSG00000024446	0.1017	1.1988	0.0848348	0.792
ENSSSCG00000021143	ENSMUSG00000032207	0.153	0.667	0.229385	0.74745
ENSSSCG00000021204	ENSMUSG00000000938	0.0262	0.2525	0.103762	0.34345
ENSSSCG00000021226	ENSMUSG00000094747	0.8117	0.614	1.32199	0.3389
ENSSSCG00000021226	ENSMUSG00000096566	0.1048	0.5824	0.179945	0.31445
ENSSSCG00000021226	ENSMUSG00000074946	0.1874	0.6152	0.304616	0.33145
ENSSSCG00000021226	ENSMUSG00000074947	0.1466	0.5299	0.276656	0.7612
ENSSSCG00000021226	ENSMUSG00000109801	0.122	0.5581	0.218599	0.7145
ENSSSCG00000021226	ENSMUSG00000109033	0.1258	0.56	0.224643	0.62475
ENSSSCG00000021226	ENSMUSG00000074945	0.1478	0.7456	0.19823	0.7819
ENSSSCG00000021226	ENSMUSG00000074952	0.1559	0.6503	0.239736	0.69405
ENSSSCG00000021278	ENSMUSG00000058655	0.0707	1.1585	0.0610272	0.7353
ENSSSCG00000021285	ENSMUSG00000045078	0.0174	0.6208	0.0280284	0.63875
ENSSSCG00000021334	ENSMUSG00000071356	0.2487	0.6807	0.365359	0.32635
ENSSSCG00000021334	ENSMUSG00000030017	0.2329	0.7036	0.331012	0.30695
ENSSSCG00000021334	ENSMUSG00000079516	0.2664	0.6183	0.430859	0.6526
ENSSSCG00000021413	ENSMUSG00000091972	0.3204	0.8847	0.362157	0.6464
ENSSSCG00000021415	ENSMUSG00000001739	0.1717	1.2114	0.141737	0.721
ENSSSCG00000021458	ENSMUSG00000026798	0.0635	0.6272	0.101244	0.6684
ENSSSCG00000021475	ENSMUSG00000028962	0.1357	1.1119	0.122043	0.78085
ENSSSCG00000021507	ENSMUSG00000048153	0.1049	0.6701	0.156544	0.798
ENSSSCG00000021612	ENSMUSG00000024043	0.1444	1.1138	0.129646	0.78845
ENSSSCG00000021647	ENSMUSG00000059327	0.0325	0.3713	0.0875303	0.6201
ENSSSCG00000021655	ENSMUSG00000052155	0.0021	0.3974	0.00528435	0.7306
ENSSSCG00000021661	ENSMUSG00000041654	0.0653	0.6638	0.098373	0.33785
ENSSSCG00000021698	ENSMUSG00000058392	0.3525	1.1674	0.301953	0.7245
ENSSSCG00000021777	ENSMUSG00000038244	0.0371	1.073	0.034576	0.32775
ENSSSCG00000021803	ENSMUSG00000037415	0.0102	0.4523	0.0225514	0.6205
ENSSSCG00000021818	ENSMUSG00000022012	0.1026	0.9375	0.10944	0.739
ENSSSCG00000021822	ENSMUSG00000058761	0.1506	0.7454	0.202039	0.60045
ENSSSCG00000021866	ENSMUSG00000072575	0.4647	1.1234	0.413655	0.3707
ENSSSCG00000021872	ENSMUSG00000044292	0.1061	0.8346	0.127127	0.3349
ENSSSCG00000021872	ENSMUSG00000060254	0.0994	0.7615	0.130532	0.3493
ENSSSCG00000021872	ENSMUSG00000059473	0.0883	0.7499	0.117749	0.74875
ENSSSCG00000021911	ENSMUSG00000036564	0.0306	0.5647	0.0541881	0.6562
ENSSSCG00000021938	ENSMUSG00000026839	0.1744	0.8223	0.212088	0.6655
ENSSSCG00000021941	ENSMUSG00000037017	0.1076	0.8236	0.130646	0.3852
ENSSSCG00000021987	ENSMUSG00000086545	0.1749	0.8187	0.213631	0.60955
ENSSSCG00000022035	ENSMUSG00000060201	0.216	0.4918	0.439203	0.68845
ENSSSCG00000022080	ENSMUSG00000036463	0.092	0.8276	0.111165	0.6696
ENSSSCG00000022093	ENSMUSG00000030657	0.0079	0.6041	0.0130773	0.629
ENSSSCG00000022107	ENSMUSG00000001017	0.002	0.1057	0.0189215	0.3033
ENSSSCG00000022143	ENSMUSG00000020660	0.1837	2.0764	0.0884704	0.6608
ENSSSCG00000022177	ENSMUSG00000053333	0.1211	0.5066	0.239045	0.32105
ENSSSCG00000022230	ENSMUSG00000030342	0.0808	0.8254	0.0978919	1.9375
ENSSSCG00000022254	ENSMUSG00000030498	0.0183	0.7486	0.0244456	0.6445
ENSSSCG00000022262	ENSMUSG00000029174	0.1327	0.7582	0.17502	0.6782
ENSSSCG00000022276	ENSMUSG00000058662	0.1386	1.1012	0.125863	0.68915
ENSSSCG00000022276	ENSMUSG00000061626	0.1254	1.0156	0.123474	0.3608
ENSSSCG00000022309	ENSMUSG00000040229	0.0642	0.6449	0.0995503	0.38365
ENSSSCG00000022372	ENSMUSG00000031089	0.0601	0.4755	0.126393	0.238
ENSSSCG00000022409	ENSMUSG00000019088	0.3199	1.6024	0.199638	0.19805
ENSSSCG00000022410	ENSMUSG00000035569	0.0542	1.8444	0.0293863	0.2871
ENSSSCG00000022420	ENSMUSG00000030036	0.0745	0.5825	0.127897	0.16685
ENSSSCG00000022426	ENSMUSG00000078355	0.3211	0.9299	0.345306	3.57555
ENSSSCG00000022426	ENSMUSG00000078354	0.3318	0.8496	0.390537	0.22145
ENSSSCG00000022426	ENSMUSG00000101252	0.2927	0.7749	0.377726	0.13015
ENSSSCG00000022426	ENSMUSG00000100713	0.3049	0.7391	0.412529	0.19635
ENSSSCG00000022426	ENSMUSG00000100079	0.3083	0.8081	0.381512	0.3902
ENSSSCG00000022426	ENSMUSG00000096011	0.2943	0.7022	0.419111	0.2562
ENSSSCG00000022426	ENSMUSG00000063376	0.8749	0.8313	1.05245	0.17345
ENSSSCG00000022426	ENSMUSG00000095270	0.3072	0.7476	0.410915	0.21235
ENSSSCG00000022426	ENSMUSG00000096682	0.8774	0.7206	1.2176	0.0613
ENSSSCG00000022426	ENSMUSG00000070904	0.316	0.8652	0.365233	0.34505
ENSSSCG00000022426	ENSMUSG00000073811	0.3062	0.663	0.46184	0.30515
ENSSSCG00000022426	ENSMUSG00000100549	0.3264	0.8494	0.384271	0.2123
ENSSSCG00000022426	ENSMUSG00000095498	0.3012	0.7612	0.395691	0.37895
ENSSSCG00000022426	ENSMUSG00000095896	0.3192	0.7972	0.400401	0.32295
ENSSSCG00000022459	ENSMUSG00000054717	0.021	0.7683	0.0273331	0.30185
ENSSSCG00000022493	ENSMUSG00000014361	0.812	0.915	0.887432	0.24715
ENSSSCG00000022594	ENSMUSG00000062797	0.031	0.2016	0.15377	1.90315
ENSSSCG00000022597	ENSMUSG00000063683	0.2053	0.6984	0.293958	0.19775
ENSSSCG00000022692	ENSMUSG00000051735	0.3012	0.7354	0.409573	0.27725
ENSSSCG00000022722	ENSMUSG00000050357	0.1566	0.626	0.25016	0.6055
ENSSSCG00000022725	ENSMUSG00000059714	0.0074	0.714	0.0103641	0.64785
ENSSSCG00000022816	ENSMUSG00000046180	0.4414	0.8647	0.510466	0.6932
ENSSSCG00000022823	ENSMUSG00000005410	0.1846	1.606	0.114944	0.6856
ENSSSCG00000022928	ENSMUSG00000109354	0.1493	0.962	0.155198	0.3121
ENSSSCG00000022928	ENSMUSG00000036744	0.1438	1.0337	0.139112	0.71625
ENSSSCG00000022930	ENSMUSG00000044715	0.0592	0.7637	0.0775173	0.3651
ENSSSCG00000022940	ENSMUSG00000029405	0.0148	0.4151	0.0356541	0.6093
ENSSSCG00000022966	ENSMUSG00000030048	0.1646	0.6036	0.272697	0.6606
ENSSSCG00000022997	ENSMUSG00000061367	0.0883	0.5585	0.158102	0.7814
ENSSSCG00000023029	ENSMUSG00000073998	0.0967	1.0394	0.0930344	0.3115
ENSSSCG00000023029	ENSMUSG00000073997	0.0756	0.8677	0.0871269	0.66555
ENSSSCG00000023036	ENSMUSG00000032481	0.0551	0.7098	0.0776275	0.63875
ENSSSCG00000023038	ENSMUSG00000090486	0.6724	62.8744	0.0106943	0.62635
ENSSSCG00000023042	ENSMUSG00000050105	0.192	1.2484	0.153797	0.74185
ENSSSCG00000023066	ENSMUSG00000031513	0.0075	0.6464	0.0116027	0.13545
ENSSSCG00000023091	ENSMUSG00000003464	0.0501	0.6057	0.0827142	0.14515
ENSSSCG00000023099	ENSMUSG00000014763	0.2237	2.4212	0.0923922	0.3615
ENSSSCG00000023102	ENSMUSG00000020723	0.0112	0.7491	0.0149513	0.1007
ENSSSCG00000023121	ENSMUSG00000035722	0.1508	1.1805	0.127742	0.3999
ENSSSCG00000023151	ENSMUSG00000020734	0.0829	1.8282	0.0453451	0.103
ENSSSCG00000023165	ENSMUSG00000038264	0.08	0.7098	0.112708	0.288
ENSSSCG00000023180	ENSMUSG00000058297	0.0508	0.9769	0.0520012	0.15565
ENSSSCG00000023189	ENSMUSG00000015879	0.4319	2.3734	0.181975	0.12655
ENSSSCG00000023215	ENSMUSG00000040147	0.0691	0.6202	0.111416	0.18425
ENSSSCG00000023293	ENSMUSG00000001376	0.0455	0.533	0.0853659	0.37005
ENSSSCG00000023316	ENSMUSG00000071890	0.2477	0.6352	0.389956	0.10205
ENSSSCG00000023352	ENSMUSG00000078624	0.8184	0.9026	0.906714	0.2187
ENSSSCG00000023429	ENSMUSG00000020867	0.0869	1.1093	0.0783377	0.26985
ENSSSCG00000023433	ENSMUSG00000000149	0.0063	6.1925	0.00101736	0.1291
ENSSSCG00000023443	ENSMUSG00000071356	0.2509	0.6478	0.387311	0.2586
ENSSSCG00000023443	ENSMUSG00000030017	0.2317	0.6489	0.357066	0.1256
ENSSSCG00000023443	ENSMUSG00000079516	0.2778	0.6334	0.438585	0.1062
ENSSSCG00000023454	ENSMUSG00000032743	0.028	0.7534	0.0371649	0.274
ENSSSCG00000023483	ENSMUSG00000031398	0.0399	1.4449	0.0276144	0.2824
ENSSSCG00000023500	ENSMUSG00000025043	0.2035	1.2288	0.165609	0.17295
ENSSSCG00000023512	ENSMUSG00000020261	0.0996	0.7194	0.138449	0.3018
ENSSSCG00000023522	ENSMUSG00000037820	0.0842	1.3401	0.0628311	0.78905
ENSSSCG00000023545	ENSMUSG00000053815	0.1229	0.5486	0.224025	0.77755
ENSSSCG00000023556	ENSMUSG00000003435	0.0087	0.8421	0.0103313	0.78195
ENSSSCG00000023570	ENSMUSG00000038151	0.0788	0.7038	0.111964	0.64265
ENSSSCG00000023578	ENSMUSG00000053961	0.252	0.625	0.4032	0.66765
ENSSSCG00000023578	ENSMUSG00000060615	0.259	0.6092	0.425148	0.78675
ENSSSCG00000023578	ENSMUSG00000072598	0.3157	0.5643	0.559454	0.7424
ENSSSCG00000023578	ENSMUSG00000047894	0.2549	0.5723	0.445396	0.6246
ENSSSCG00000023578	ENSMUSG00000072115	0.2311	0.4971	0.464896	0.30735
ENSSSCG00000023612	ENSMUSG00000101605	0.2063	1.0268	0.200915	0.78435
ENSSSCG00000023679	ENSMUSG00000027703	0.2441	0.9421	0.259102	0.65265
ENSSSCG00000023731	ENSMUSG00000029234	0.013	0.5845	0.0222412	0.70045
ENSSSCG00000023732	ENSMUSG00000078234	0.1986	0.8404	0.236316	0.68115
ENSSSCG00000023748	ENSMUSG00000031879	0.8187	1.2374	0.661629	0.60875
ENSSSCG00000023796	ENSMUSG00000070427	0.3096	0.7157	0.432583	0.3217
ENSSSCG00000023801	ENSMUSG00000062190	0.1086	1.0625	0.102212	0.78075
ENSSSCG00000023804	ENSMUSG00000031133	0.1236	0.8521	0.145053	0.6565
ENSSSCG00000023839	ENSMUSG00000040782	0.0921	0.5277	0.174531	0.34125
ENSSSCG00000023877	ENSMUSG00000052395	0.8148	0.5134	1.58707	0.19805
ENSSSCG00000023897	ENSMUSG00000062866	0.1751	1.434	0.122106	0.1636
ENSSSCG00000023926	ENSMUSG00000041135	0.0548	0.698	0.07851	0.2239
ENSSSCG00000023937	ENSMUSG00000006390	0.0624	0.728	0.0857143	0.2035
ENSSSCG00000023958	ENSMUSG00000038240	0.0542	0.4936	0.109806	0.18845
ENSSSCG00000023960	ENSMUSG00000023977	0.1315	0.7984	0.164704	0.1309
ENSSSCG00000023999	ENSMUSG00000010461	0.0162	0.4528	0.0357774	0.35085
ENSSSCG00000024064	ENSMUSG00000029634	0.5756	3.2227	0.178608	0.1603
ENSSSCG00000024091	ENSMUSG00000070369	0.1994	0.7534	0.264667	0.34715
ENSSSCG00000024126	ENSMUSG00000022234	0.0663	1.1636	0.0569783	0.141
ENSSSCG00000024289	ENSMUSG00000021478	0.04	0.6767	0.0591104	0.12875
ENSSSCG00000024296	ENSMUSG00000021772	0.0261	0.9253	0.0282071	0.16705
ENSSSCG00000024310	ENSMUSG00000039109	0.0867	1.0612	0.0817	0.26045
ENSSSCG00000024315	ENSMUSG00000036860	0.2127	1.3701	0.155244	0.19785
ENSSSCG00000024423	ENSMUSG00000020673	0.1858	1.9008	0.0977483	1.91586
ENSSSCG00000024435	ENSMUSG00000023247	0.2656	1.087	0.244342	0.21435
ENSSSCG00000024458	ENSMUSG00000032788	0.1017	1.4844	0.0685125	0.13415
ENSSSCG00000024483	ENSMUSG00000035372	0.5869	0.8819	0.665495	0.26965
ENSSSCG00000024514	ENSMUSG00000042655	0.0913	0.5206	0.175375	0.31705
